# Supplementary material
Source: PubMed Central journal article supplement (PMC2720709)
Supplement: djp038_1.pdf [file djp038_1.pdf]

Supplemental Table 1: Summary of identified manuscripts (n=515)

| <u>First author, year</u>                                                                              | <u>Assayed Samples</u> |                     |                   | <u>Proteins assayed</u>                                                                                                                                                                                                                                                                                                      | <u>Citation</u>                                                 | <u>Ref.</u> |
|--------------------------------------------------------------------------------------------------------|------------------------|---------------------|-------------------|------------------------------------------------------------------------------------------------------------------------------------------------------------------------------------------------------------------------------------------------------------------------------------------------------------------------------|-----------------------------------------------------------------|-------------|
|                                                                                                        | <u>nevi</u>            | <u>1° melanomas</u> | <u>metastases</u> |                                                                                                                                                                                                                                                                                                                              |                                                                 |             |
| Included studies: Retrospective/prospective cohort studies meeting all eligibility requirements (n=37) |                        |                     |                   |                                                                                                                                                                                                                                                                                                                              |                                                                 |             |
| Rangel J, 2008                                                                                         | -                      | 345                 | -                 | Osteopontin                                                                                                                                                                                                                                                                                                                  | <i>Cancer</i> <b>112</b> : 144-150 (2008)                       | (1)         |
| Pearl RA, 2008                                                                                         | -                      | 76                  | 92                | MCAM                                                                                                                                                                                                                                                                                                                         | <i>J Plast Reconstr Aesthet Surg</i> <b>61</b> : 265-271 (2008) | (2)         |
| Vaisanen AH, 2008                                                                                      | -                      | 157                 | -                 | MMP-2, MMP-9                                                                                                                                                                                                                                                                                                                 | <i>Hum Pathol</i> <b>39</b> : 377-385 (2008) (epub Jan. 2008)   | (3)         |
| Alonso SR, 2007                                                                                        | -                      | 127                 | -                 | Glypican-3, N-cadherin, osteonectin, osteopontin, protein kinase C- $\alpha$                                                                                                                                                                                                                                                 | <i>Cancer Res</i> <b>67</b> : 3450-3460 (2007)                  | (4)         |
| Piras F, 2007                                                                                          | -                      | 50                  | -                 | Survivin                                                                                                                                                                                                                                                                                                                     | <i>Histopathology</i> <b>50</b> : 835-842 (2007)                | (5)         |
| Weinlich G, 2007                                                                                       | -                      | 158                 | -                 | Metallothionein                                                                                                                                                                                                                                                                                                              | <i>J Eur Acad Dermatol Venerol</i> <b>21</b> : 669-677 (2007)   | (6)         |
| Ekmekcioglu S, 2006                                                                                    | -                      | 132                 | -                 | iNOS                                                                                                                                                                                                                                                                                                                         | <i>Int J Cancer</i> <b>119</b> : 861-866 (2006)                 | (7)         |
| Pacifico MD, 2006                                                                                      | -                      | 84                  | -                 | CD44v3                                                                                                                                                                                                                                                                                                                       | <i>Int J Cancer</i> <b>118</b> : 1460-1464 (2006)               | (8)         |
| Rangel J, 2006                                                                                         | -                      | 343                 | -                 | NCOA3/AIB-1                                                                                                                                                                                                                                                                                                                  | <i>J Clin Oncol</i> <b>24</b> : 4565-4569 (2006)                | (9)         |
| Weinlich G, 2006                                                                                       | -                      | 1270                | -                 | Metallothionein                                                                                                                                                                                                                                                                                                              | <i>Br J Cancer</i> <b>94</b> : 835-841 (2006)                   | (10)        |
| Berger AJ, 2005                                                                                        | 62                     | 236                 | 324               | AP-2 $\alpha$                                                                                                                                                                                                                                                                                                                | <i>Cancer Res</i> <b>65</b> : 11185-11192 (2005)                | (11)        |
| Pacifico MD, 2005a                                                                                     | -                      | 76                  | -                 | P-cadherin                                                                                                                                                                                                                                                                                                                   | <i>Ann Plast Surg</i> <b>55</b> : 316-320 (2005)                | (12)        |
| Pacifico MD, 2005b                                                                                     | -                      | 76                  | -                 | nm23                                                                                                                                                                                                                                                                                                                         | <i>Melanoma Res</i> <b>15</b> : 435-440 (2005)                  | (13)        |
| Pacifico MD, 2005c                                                                                     | -                      | 76                  | -                 | MCAM                                                                                                                                                                                                                                                                                                                         | <i>Plast Reconstr Surg</i> <b>115</b> : 367-375 (2005)          | (14)        |
| Scala S, 2005                                                                                          | -                      | 71                  | -                 | CXCR4                                                                                                                                                                                                                                                                                                                        | <i>Clin Cancer Res</i> <b>11</b> : 1835-1841 (2005)             | (15)        |
| Soltani MH, 2005                                                                                       | -                      | 37                  | -                 | Microtubule-associated protein-2                                                                                                                                                                                                                                                                                             | <i>Am J Pathol</i> <b>166</b> : 1841-1850 (2005)                | (16)        |
| Straume O, 2005                                                                                        | -                      | 125                 | -                 | Ets-1, Id1                                                                                                                                                                                                                                                                                                                   | <i>Br J Cancer</i> <b>93</b> : 933-938 (2005)                   | (17)        |
| Alonso SR, 2004                                                                                        | -                      | 60                  | -                 | Bcl-2, bcl-6, bcl-xL, BMI-1, caveolin, cdk-1, cdk-2, cdk-6, c-Kit, cyclin A, cyclin B1, cyclin D1, cyclin D3, cyclin E, gp100, HDM2, IRF4/mum-1, Ki-67, Mel-18, MelanA, MHC Class II, MLH-1, p16/INK4A, p21/WAF1, p27/KIP1, p53, PH1, protein kinase C $\beta$ , Rb, RING-1B, RYBP, Skp2, STAT-1, survivin, topoisomerase II | <i>Am J Pathol</i> <b>164</b> : 193-203 (2004)                  | (18)        |
| Berger AJ, 2004                                                                                        | -                      | 203                 | 190               | HDM2                                                                                                                                                                                                                                                                                                                         | <i>Cancer Res</i> <b>64</b> : 8767-8772 (2004)                  | (19)        |
| Divito KA, 2004                                                                                        | -                      | 269                 | 233               | Bcl-2                                                                                                                                                                                                                                                                                                                        | <i>Cancer Res</i> <b>64</b> : 8773-8777 (2004)                  | (20)        |
| Hofbauer GF, 2004                                                                                      | -                      | 91                  | -                 | gp100, MAGE-3, MelanA, MHC Class I, tyrosinase                                                                                                                                                                                                                                                                               | <i>J Immunother</i> <b>27</b> : 73-78 (2004)                    | (21)        |
| Ilmonen S, 2004                                                                                        | -                      | 98                  | -                 | Tenascin-C                                                                                                                                                                                                                                                                                                                   | <i>Histopathology</i> <b>45</b> : 405-411 (2004)                | (22)        |
| Li Q, 2004                                                                                             | 22                     | 119                 | 35                | p27/KIP1, Skp2                                                                                                                                                                                                                                                                                                               | <i>J Cutan Pathol</i> <b>31</b> : 633-642 (2004)                | (23)        |
| Berger AJ, 2003                                                                                        | -                      | 269                 | 273               | ATF-2                                                                                                                                                                                                                                                                                                                        | <i>Cancer Res</i> <b>63</b> : 8103-8107 (2003)                  | (24)        |
| Korabiowska M, 2002a                                                                                   | 19                     | 76                  | 31                | Ku70, Ku80                                                                                                                                                                                                                                                                                                                   | <i>Mod Pathol</i> <b>15</b> : 426-433 (2002)                    | (25)        |
| Thies A, 2002a                                                                                         | 12                     | 100                 | 14                | LI-CAM                                                                                                                                                                                                                                                                                                                       | <i>Eur J Cancer</i> <b>38</b> : 1708-1716 (2002)                | (26)        |
| Thies A, 2002b                                                                                         | -                      | 100                 | 18                | CEACAM                                                                                                                                                                                                                                                                                                                       | <i>J Clin Oncol</i> <b>20</b> : 2530-2536 (2002)                | (27)        |
| Florenes VA, 2001                                                                                      | 10                     | 172                 | 73                | Cyclin A, Ki-67                                                                                                                                                                                                                                                                                                              | <i>J Pathol</i> <b>195</b> : 530-536 (2001)                     | (28)        |
| Ferrier CM, 2000                                                                                       | -                      | 214                 | -                 | PAI-1, PAI-2, tPA, uPA, uPAR                                                                                                                                                                                                                                                                                                 | <i>Br J Cancer</i> <b>83</b> : 1351-1359 (2000)                 | (29)        |
| Florenes VA, 2000                                                                                      | 10                     | 172                 | 73                | Cyclin D1, cyclin D3                                                                                                                                                                                                                                                                                                         | <i>Clin Cancer Res</i> <b>6</b> : 3614-3620 (2000)              | (30)        |

Supplemental Table 1: Summary of identified manuscripts (n=515), cont'd

| <b>First author, year</b>                                                                                                                     | <b>Assayed samples</b> |                     |                   | <b>Proteins assayed</b>                                            | <b>Citation</b>                                              | <b>Ref.</b> |
|-----------------------------------------------------------------------------------------------------------------------------------------------|------------------------|---------------------|-------------------|--------------------------------------------------------------------|--------------------------------------------------------------|-------------|
|                                                                                                                                               | <b>nevi</b>            | <b>1° melanomas</b> | <b>metastases</b> |                                                                    |                                                              |             |
| <b>Included studies: Retrospective/prospective cohort studies meeting all eligibility requirements (n=37), cont'd</b>                         |                        |                     |                   |                                                                    |                                                              |             |
| Karjalainen JM, 2000                                                                                                                          | -                      | 282                 | -                 | CD44                                                               | <i>Am J Pathol</i> <b>157</b> : 957-965 (2000)               | (31)        |
| McDermott NC, 2000                                                                                                                            | -                      | 157                 | -                 | nm23                                                               | <i>J Pathol</i> <b>190</b> : 157-162 (2000)                  | (32)        |
| Straume O, 2000                                                                                                                               | -                      | 187                 | 68                | Ki-67, p16/INK4a, p53                                              | <i>Clin Cancer Res</i> <b>6</b> : 1845-1853 (2000)           | (33)        |
| Niezabitowski A, 1999                                                                                                                         | -                      | 93                  | -                 | gp100, Ki-67, p53, PCNA, S100B, vimentin                           | <i>J Surg Oncol</i> <b>70</b> : 150-160 (1999)               | (34)        |
| Karjalainen JM, 1998                                                                                                                          | -                      | 273                 | -                 | AP-2 $\alpha$                                                      | <i>J Clin Oncol</i> <b>16</b> : 3584-3591 (1998)             | (35)        |
| Tran TA, 1998                                                                                                                                 | 60                     | 66                  | -                 | Cyclin A, cyclin B, cdk-1, Ki-67                                   | <i>Hum Pathol</i> <b>29</b> : 1085-1090 (1998)               | (36)        |
| Vaisanen AH, 1998                                                                                                                             | -                      | 50                  | 0                 | MMP-2                                                              | <i>J Pathol</i> <b>186</b> : 51-58 (1998)                    | (37)        |
| <b>Excluded studies: Retrospective/prospective cohort studies with data redundant with another cohort study study (n=4)</b>                   |                        |                     |                   |                                                                    |                                                              |             |
| Potti A, 2003b                                                                                                                                | -                      | 202                 | -                 | VEGF                                                               | <i>Anticancer Res</i> <b>23</b> : 4023-4026 (2003)           | (38)        |
| Potti A, 2003c                                                                                                                                | -                      | 202                 | -                 | c-Kit, Her2/neu                                                    | <i>J Carcinog</i> <b>2</b> : 8 (2003)                        | (39)        |
| Weinlich G, 2003                                                                                                                              | -                      | 520                 | -                 | Metallothionein                                                    | <i>Br J Dermatol</i> <b>149</b> : 535-541 (2003)             | (40)        |
| Straume O, 1997                                                                                                                               | -                      | 187                 | -                 | Ki-67, p53                                                         | <i>Int J Cancer</i> <b>74</b> : 535-539 (1997)               | (41)        |
| <b>Excluded studies: Retrospective/prospective cohort studies that did not sample primary melanomas (n=1)</b>                                 |                        |                     |                   |                                                                    |                                                              |             |
| Vlaykova T, 2002                                                                                                                              | -                      | -                   | 60                | Bcl-2                                                              | <i>Oncology</i> <b>62</b> : 259-268 (2002)                   | (42)        |
| <b>Excluded studies: Retrospective/prospective cohort studies that did not report risk estimate or associated confidence intervals (n=12)</b> |                        |                     |                   |                                                                    |                                                              |             |
| Pearl RA, 2007                                                                                                                                | -                      | 79                  | 82                | Ki-67                                                              | <i>J Exp Clin Cancer Res</i> <b>26</b> : 109-115 (2007)      | (43)        |
| Mihic-Probst D, 2006                                                                                                                          | 34                     | 64                  | -                 | p16/INK4A                                                          | <i>Int J Cancer</i> <b>118</b> : 2262-2268 (2006)            | (44)        |
| Potti A, 2004                                                                                                                                 | -                      | 202                 | -                 | c-Kit, Her2/neu, VEGF                                              | <i>J Cancer Res Clin Oncol</i> <b>130</b> : 80-86 (2004)     | (45)        |
| Giatromanolaki A, 2003                                                                                                                        | -                      | 46                  | -                 | HIF-1 $\alpha$ , HIF-2 $\alpha$ , thymidine phosphorylase, VEGF    | <i>Melanoma Res</i> <b>13</b> : 493-501 (2003)               | (46)        |
| Maelandsmo GM, 2003                                                                                                                           | 7                      | 164                 | 66                | $\beta$ -catenin                                                   | <i>Clin Cancer Res</i> <b>9</b> : 3383-3388 (2003)           | (47)        |
| Mu XC, 2000                                                                                                                                   | 63                     | 117                 | 46                | Topoisomerase II                                                   | <i>J Cutan Pathol</i> <b>27</b> : 242-248 (2000)             | (48)        |
| Hieken TJ, 1999                                                                                                                               | -                      | 111                 | -                 | Integrin $\beta$ 1, integrin $\beta$ 3, p53                        | <i>Cancer</i> <b>85</b> : 375-382 (1999)                     | (49)        |
| Karjalainen JM, 1999                                                                                                                          | -                      | 284                 | -                 | p21/WAF1, p53, PCNA                                                | <i>Br J Cancer</i> <b>79</b> : 895-902 (1999)                | (50)        |
| Ostmeier H, 1999                                                                                                                              | -                      | 691                 | -                 | Integrin $\alpha$ 2, ICAM-1, L-selectin, MHC Class I, MHC Class II | <i>Cancer</i> <b>85</b> : 2391-2399                          | (51)        |
| Talve LA, 1996a                                                                                                                               | -                      | 76                  | -                 | Ki-67                                                              | <i>J Cutan Pathol</i> <b>23</b> : 335-343 (1996)             | (52)        |
| Talve LA, 1996b                                                                                                                               | -                      | 80                  | -                 | p53                                                                | <i>Pathol Res Pract</i> <b>192</b> : 825-833 (1996)          | (53)        |
| Ramsay JA, 1995a                                                                                                                              | -                      | 64                  | -                 | Ki-67                                                              | <i>J Invest Dermatol</i> <b>105</b> : 22-26 (1995)           | (54)        |
| <b>Excluded studies: Retrospective/prospective cohort studies reporting only univariate risk estimates (n=21)</b>                             |                        |                     |                   |                                                                    |                                                              |             |
| McCarthy MM, 2008                                                                                                                             | 540                    | 230                 | 293               | HSP90                                                              | <i>Ann Oncol</i> <b>19</b> : 590-594 (2008) (epub Nov. 2007) | (55)        |
| Jorgensen K, 2006                                                                                                                             | 27                     | 154                 | 73                | JNK, p38 MAPK                                                      | <i>Mod Pathol</i> <b>19</b> : 1446-1455 (2006)               | (56)        |
| Lu F, 2006                                                                                                                                    | 68                     | 79                  | 43                | ING2                                                               | <i>Br J Cancer</i> <b>95</b> : 80-86 (2006)                  | (57)        |
| McCarthy MM, 2006                                                                                                                             | 540                    | 203                 | 314               | TRAIL-R1, TRAIL-R2                                                 | <i>Clin Cancer Res</i> <b>12</b> : 3856-3863 (2006)          | (58)        |
| Sirigu P, 2006                                                                                                                                | -                      | 82                  | -                 | p16/INK4A, p53                                                     | <i>Eur J Histochem</i> <b>50</b> : 191-198 (2006)            | (59)        |
| Slipicevic A, 2005                                                                                                                            | 41                     | 162                 | 71                | Akt, PTEN                                                          | <i>Am J Clin Pathol</i> <b>124</b> : 528-536 (2005)          | (60)        |
| Zhuang L, 2005                                                                                                                                | 20                     | 42                  | 38                | ERK 1/2                                                            | <i>J Clin Pathol</i> <b>58</b> : 1163-1169 (2005)            | (61)        |
| Andersen K, 2004                                                                                                                              | 8                      | 159                 | 62                | E-cadherin, S100A4                                                 | <i>Mod Pathol</i> <b>17</b> : 990-997 (2004)                 | (62)        |
| Bachmann IM, 2004                                                                                                                             | -                      | 160                 | 59                | Cyclin D1, cdk4, p14/ARF, Rb                                       | <i>Int J Oncol</i> <b>25</b> : 1559-1565 (2004)              | (63)        |
| Dai DL, 2004                                                                                                                                  | 13                     | 70                  | -                 | APAF-1                                                             | <i>Br J Cancer</i> <b>91</b> : 1089-1095 (2004)              | (64)        |
| Florenes VA, 2004                                                                                                                             | 8                      | 152                 | 64                | p75 <sup>NTR</sup> , Trk-A                                         | <i>Am J Clin Pathol</i> <b>122</b> : 412-420 (2004)          | (65)        |

Supplemental Table 1: Summary of identified manuscripts (n=515), cont'd

| <b>First author, year</b>                                                                                                  | <b>Assayed samples</b> |                     |                   | <b>Proteins assayed</b>                                         | <b>Citation</b>                                                       | <b>Ref.</b> |
|----------------------------------------------------------------------------------------------------------------------------|------------------------|---------------------|-------------------|-----------------------------------------------------------------|-----------------------------------------------------------------------|-------------|
|                                                                                                                            | <b>nevi</b>            | <b>1° melanomas</b> | <b>metastases</b> |                                                                 |                                                                       |             |
| <b>Excluded studies: Retrospective/prospective cohort studies reporting only univariate risk estimates (n=21), cont'd</b>  |                        |                     |                   |                                                                 |                                                                       |             |
| Korabiowska M, 2004a                                                                                                       | 36                     | 88                  | 28                | APC                                                             | <i>Mod Pathol</i> <b>17</b> : 1539-1544 (2004)                        | (66)        |
| Torlakovic EE, 2004                                                                                                        | 23                     | 69                  | 28                | Ets-1                                                           | <i>Mod Pathol</i> <b>17</b> : 1400-1406 (2004)                        | (67)        |
| Cruz J, 2003                                                                                                               | -                      | 59                  | -                 | c-Met                                                           | <i>Oncology</i> <b>65</b> : 72-82 (2003)                              | (68)        |
| Jorgensen K, 2003                                                                                                          | 41                     | 172                 | 67                | ERK 1/2                                                         | <i>Clin Cancer Res</i> <b>9</b> : 5325-5331 (2003)                    | (69)        |
| Korabiowska M, 2002                                                                                                        | -                      | 106                 | -                 | GADD34, GADD45, GADD153                                         | <i>Histol Histopathol</i> <b>17</b> : 805-811 (2002)                  | (70)        |
| Nikkola J, 2002                                                                                                            | -                      | -                   | 56                | MMP-1, MMP-3, MMP-13                                            | <i>Int J Cancer</i> <b>97</b> : 432-438 (2002)                        | (71)        |
| Straume O, 2002                                                                                                            | -                      | 176                 | 56                | EphA2, Ephrin A1, FGFR1, FGF-2, IL-8, VEGF-type C, FLT-4        | <i>Am J Pathol</i> <b>160</b> : 1009-1019 (2002)                      | (72)        |
| Straume O, 2001                                                                                                            | -                      | 187                 | 68                | Thrombospondin-1, VEGF, FLT-1, FLK                              | <i>Am J Pathol</i> <b>159</b> : 223-235 (2001)                        | (73)        |
| Ekmekcioglu S, 2000                                                                                                        | -                      | -                   | 20                | iNOS                                                            | <i>Clin Cancer Res</i> <b>6</b> : 4768-4775 (2000)                    | (74)        |
| Henrique R, 2000                                                                                                           | -                      | 82                  | -                 | Ki-67                                                           | <i>J Am Acad Dermatol</i> <b>43</b> : 991-1000 (2000)                 | (75)        |
| <b>Excluded studies: Retrospective/prospective cohort studies reporting incomplete immunohistochemistry methods (n=27)</b> |                        |                     |                   |                                                                 |                                                                       |             |
| Dai DL, 2008                                                                                                               | 52                     | 159                 | 52                | Bim                                                             | <i>J Invest Dermatol</i> <b>128</b> : 403-407 (2008) (epub July 2007) | (76)        |
| Tucci MG, 2007                                                                                                             | -                      | 30                  | -                 | β-catenin, CXCR4, E-cadherin, cdc42                             | <i>Br J Dermatol</i> <b>157</b> : 1212-1216 (2007)                    | (77)        |
| Wang Y, 2007                                                                                                               | 58                     | 114                 | 50                | ING3                                                            | <i>Clin Cancer Res</i> <b>13</b> : 4111-4115 (2007)                   | (78)        |
| Bachmann IM, 2006                                                                                                          | -                      | 202                 | 58                | EZH2                                                            | <i>J Clin Oncol</i> <b>24</b> : 268-273 (2006)                        | (79)        |
| Streit S, 2006                                                                                                             | -                      | 137                 | -                 | FGFR4                                                           | <i>Br J Cancer</i> <b>94</b> : 1879-1886 (2006)                       | (80)        |
| Bachmann IM, 2005                                                                                                          | 31                     | 149                 | 58                | β-catenin, E-cadherin, Frizzled, N-cadherin, P-cadherin, wnt-5α | <i>Clin Cancer Res</i> <b>11</b> : 8606-8614 (2005)                   | (81)        |
| Dai DL, 2005                                                                                                               | 70                     | 170                 | 52                | Akt                                                             | <i>J Clin Oncol</i> <b>23</b> : 1473-1482 (2005)                      | (82)        |
| Gimotty PA, 2005                                                                                                           | -                      | 396                 | -                 | Ki-67                                                           | <i>J Clin Oncol</i> <b>23</b> : 8048-8056 (2005)                      | (83)        |
| Ilmonen S, 2005a                                                                                                           | -                      | 113                 | -                 | Bcl-2, Ki-67, p53                                               | <i>Melanoma Res</i> <b>15</b> : 375-381 (2005)                        | (84)        |
| Ilmonen S, 2005b                                                                                                           | -                      | 95                  | 12                | Ezrin                                                           | <i>Mod Pathol</i> <b>18</b> : 503-510 (2005)                          | (85)        |
| Karst AM, 2005                                                                                                             | 64                     | 107                 | 51                | PUMA                                                            | <i>Oncogene</i> <b>24</b> : 1111-1116 (2005)                          | (86)        |
| Staibano S, 2005                                                                                                           | 15                     | 80                  | -                 | PARP-1                                                          | <i>Hum Pathol</i> <b>36</b> : 724-731 (2005)                          | (87)        |
| Zhou Y, 2005                                                                                                               | 35                     | 85                  | 18                | Osteopontin                                                     | <i>J Invest Dermatol</i> <b>124</b> : 1044-1052 (2005)                | (88)        |
| Korabiowska, 2004b                                                                                                         | -                      | 109                 | -                 | Cytokeratin 8                                                   | <i>Anticancer Res</i> <b>24</b> : 3203-3207 (2004)                    | (89)        |
| Nikkola J, 2004                                                                                                            | -                      | -                   | 68                | Integrin αv, Integrin β1                                        | <i>Melanoma Res</i> <b>14</b> : 29-37 (2004)                          | (90)        |
| Dai DL, 2003                                                                                                               | 12                     | 76                  | -                 | Integrin-linked kinase                                          | <i>Clin Cancer Res</i> <b>9</b> : 4409-4414 (2003)                    | (91)        |
| Kielhorn E, 2003                                                                                                           | -                      | 75                  | 80                | β-catenin                                                       | <i>Int J Cancer</i> <b>103</b> : 652-656 (2003)                       | (92)        |
| Gutman M, 2002                                                                                                             | -                      | 49                  | 57                | IL-8                                                            | <i>Anticancer Res</i> <b>22</b> : 3395-3398 (2002)                    | (93)        |
| Hazan C, 2002                                                                                                              | -                      | 137                 | -                 | Ki-67                                                           | <i>Cancer</i> <b>95</b> : 634-640 (2002)                              | (94)        |
| Polisky D, 2002                                                                                                            | -                      | 134                 | -                 | HDM2, p53                                                       | <i>J Natl Cancer Inst</i> <b>94</b> : 1803-1806 (2002)                | (95)        |
| Korabiowska M, 2001                                                                                                        | 61                     | 106                 | 42                | Rb                                                              | <i>Pathobiology</i> <b>69</b> : 274-280 (2001)                        | (96)        |
| Moretti S, 2001                                                                                                            | -                      | 55                  | -                 | Ki-67                                                           | <i>J Am Acad Dermatol</i> <b>44</b> : 188-192 (2001)                  | (97)        |
| Ostmeier H, 2001                                                                                                           | -                      | 688                 | -                 | Ki-67, MCAM, MHC Class II, CD68, Muc54, transferring receptor   | <i>Br J Dermatol</i> <b>145</b> : 203-209 (2001)                      | (98)        |
| Ricaniadis N, 2001                                                                                                         | -                      | 40                  | -                 | c-myc, HSP70, MHC Class II                                      | <i>Eur J Surg Oncol</i> <b>27</b> : 88-93 (2001)                      | (99)        |
| Korabiowska M, 2000b                                                                                                       | -                      | 106                 | -                 | MLH1, MSH2, PMS1, PMS2                                          | <i>Anticancer Res</i> <b>20</b> : 4499-4505 (2000)                    | (100)       |

Supplemental Table 1: Summary of identified manuscripts (n=515), cont'd

| <b>First author, year</b>                                                                                                          | <b>Assayed samples</b> |                     |                   | <b>Proteins assayed</b>                                                  | <b>Citation</b>                                                       | <b>Ref.</b> |
|------------------------------------------------------------------------------------------------------------------------------------|------------------------|---------------------|-------------------|--------------------------------------------------------------------------|-----------------------------------------------------------------------|-------------|
|                                                                                                                                    | <b>nevi</b>            | <b>1° melanomas</b> | <b>metastases</b> |                                                                          |                                                                       |             |
| <b>Excluded studies: Retrospective/prospective cohort studies reporting incomplete immunohistochemistry methods (n=27), cont'd</b> |                        |                     |                   |                                                                          |                                                                       |             |
| Sauroja I, 2000                                                                                                                    | -                      | 59                  | -                 | Ki-67, HDM2, p21/WAF1, p27/KIP1, p53, Rb                                 | <i>Genes Chromosomes Cancer</i> <b>28</b> : 404-414 (2000)            | (101)       |
| van Duinen SG, 1988                                                                                                                | -                      | -                   | 48                | MHC Class I, MHC Class II                                                | <i>Cancer Res</i> <b>48</b> : 1019-1025 (1988)                        | (102)       |
| <b>Excluded studies: Case-control study design (n=16)</b>                                                                          |                        |                     |                   |                                                                          |                                                                       |             |
| Fearfield LA, 2007                                                                                                                 | -                      | 43                  | 17                | Fas ligand, Fas, p16/INK4A                                               | <i>Br J Dermatol</i> <b>156</b> : 440-447 (2007)                      | (103)       |
| Bauer R, 2006                                                                                                                      | 161                    | 88                  | 101               | P-cadherin                                                               | <i>J Clin Pathol</i> <b>59</b> : 699-705 (2006)                       | (104)       |
| Demirkesen C, 2006                                                                                                                 | -                      | 50                  | -                 | FGF-2, VEGF                                                              | <i>Pathology</i> <b>38</b> : 132-137 (2006)                           | (105)       |
| Fecker LF, 2006                                                                                                                    | -                      | 60                  | 12                | Bak, bax, bcl-2, bok, mcl-1, HDM2, p21/WAF1, p53, Rb, TRAIL-R1, TRAIL-R2 | <i>J Invest Dermatol</i> <b>126</b> : 1366-1371 (2006)                | (106)       |
| Ivan D, 2006                                                                                                                       | -                      | -                   | 26                | abl-related gene, c-abl, c-Kit, PDGFR $\alpha$ , PDGFR $\beta$           | <i>J Cutan Pathol</i> <b>33</b> : 280-285 (2006)                      | (107)       |
| Kashani-Sabet M, 2004                                                                                                              | -                      | 48                  | -                 | NF- $\kappa$ B                                                           | <i>J Clin Oncol</i> <b>22</b> : 617-623 (2004)                        | (108)       |
| Sarris M, 2004                                                                                                                     | -                      | 55                  | 24                | nm23                                                                     | <i>Melanoma Res</i> <b>14</b> : 23-27 (2004)                          | (109)       |
| Massi D, 1999                                                                                                                      | -                      | 36                  | -                 | Osteonectin                                                              | <i>Hum Pathol</i> <b>30</b> : 339-344 (1999)                          | (110)       |
| Otto FJ, 1999                                                                                                                      | -                      | 182                 | -                 | Cathepsin B, cathepsin D, MMP-2                                          | <i>Oncology</i> <b>56</b> : 208-214 (1999)                            | (111)       |
| Hernberg M, 1999                                                                                                                   | -                      | 36                  | -                 | Bcl-2, Ki-67, HDM2, p53                                                  | <i>Melanoma Res</i> <b>8</b> : 283-291 (1998)                         | (112)       |
| Sparrow LE, 1998a                                                                                                                  | 25                     | 69                  | 23                | Ki-67                                                                    | <i>Am J Dermatopathol</i> <b>20</b> : 12-16 (1998)                    | (113)       |
| Holmes SC, 1996                                                                                                                    | -                      | 22                  | -                 | nm23                                                                     | <i>J Cutan Pathol</i> <b>23</b> : 344-349 (1996)                      | (114)       |
| Hieken TJ, 1995                                                                                                                    | -                      | 76                  | -                 | Integrin $\beta$ 1                                                       | <i>Surgery</i> <b>118</b> : 669-673 (1995)                            | (115)       |
| Reddy VB, 1995                                                                                                                     | -                      | 14                  | -                 | Ki-67, p53, PCNA                                                         | <i>J Cutan Pathol</i> <b>22</b> : 248-251 (1995)                      | (116)       |
| Sparrow LE, 1995a                                                                                                                  | -                      | 40                  | -                 | p53                                                                      | <i>Melanoma Res</i> <b>5</b> : 387-392 (1995)                         | (117)       |
| Kernohan NM, 1987                                                                                                                  | -                      | 27                  | -                 | S100B                                                                    | <i>Histopathology</i> <b>11</b> : 1285-1293 (1987)                    | (118)       |
| <b>Excluded studies: Cross-sectional study design (n=284)</b>                                                                      |                        |                     |                   |                                                                          |                                                                       |             |
| Karbowiczek M, 2008                                                                                                                | 67                     | 40                  | 67                | mTOR                                                                     | <i>J Invest Dermatol</i> <b>128</b> : 980-987 (2008) (epub Oct. 2007) | (119)       |
| Batinac T, 2007                                                                                                                    | 25                     | 45                  | -                 | Bcl-2, Ki-67, p53, telomerase                                            | <i>Coll Antropol</i> <b>31 Suppl 1</b> : 17-22 (2007)                 | (120)       |
| Bertucci F, 2007                                                                                                                   | -                      | 54                  | 21                | Neutral endopeptidase                                                    | <i>Anticancer Res</i> <b>27</b> : 3441-3449 (2007)                    | (121)       |
| Chwirot BW, 2007                                                                                                                   | 58                     | 33                  | -                 | Cyclooxygenase-2                                                         | <i>Melanoma Res</i> <b>17</b> : 139-145 (2007)                        | (122)       |
| Demirkan NC, 2007                                                                                                                  | 28                     | 24                  | -                 | $\beta$ -catenin, cyclin D1, p16/INK4A                                   | <i>Clin Exp Dermatol</i> <b>32</b> : 733-739 (2007)                   | (123)       |
| Denicourt C, 2007                                                                                                                  | -                      | 42                  | 11                | p27/KIP1                                                                 | <i>Cancer Res</i> <b>67</b> : 9238-9243 (2007)                        | (124)       |
| Denk AE, 2007                                                                                                                      | 161                    | 88                  | 101               | Maspin                                                                   | <i>Pigment Cell Res</i> <b>20</b> : 112-119 (2007)                    | (125)       |
| Einspahr JG, 2007                                                                                                                  | 49                     | 16                  | -                 | VEGF                                                                     | <i>Cancer</i> <b>110</b> : 2519-2527 (2007)                           | (126)       |
| Ferrari D, 2007                                                                                                                    | -                      | 30                  | -                 | nm23                                                                     | <i>J Cutan Pathol</i> <b>34</b> : 705-712 (2007)                      | (127)       |
| Giehl KA, 2007                                                                                                                     | 44                     | 50                  | -                 | c-Kit, FGFR1, FGF-2, steel ligand                                        | <i>J Cutan Pathol</i> <b>34</b> : 7-14 (2007)                         | (128)       |
| Gilaberte Y, 2007                                                                                                                  | 86                     | 38                  | 6                 | Galanin, $\alpha$ -MSH                                                   | <i>Actas Dermosifiliogr</i> <b>98</b> : 24-34 (2007)                  | (129)       |
| Klein WM, 2007                                                                                                                     | 71                     | 71                  | 84                | ALCAM/CD166, nestin, CD133                                               | <i>Mod Pathol</i> <b>20</b> : 102-107 (2007)                          | (130)       |
| Lebe B, 2007                                                                                                                       | 63                     | 17                  | -                 | Cyclin D1, Ki-67                                                         | <i>Appl Immunohistochem Mol Morphol</i> <b>15</b> : 160-164 (2007)    | (131)       |
| Leotlela PD, 2007                                                                                                                  | 30                     | 28                  | 158               | Claudin-1                                                                | <i>Oncogene</i> <b>26</b> : 3846-3856 (2007)                          | (132)       |
| McHugh JB, 2007                                                                                                                    | 37                     | 19                  | 19                | EZH2                                                                     | <i>J Cutan Pathol</i> <b>34</b> : 597-600 (2007)                      | (133)       |
| Neto DS, 2007                                                                                                                      | 19                     | 111                 | 29                | Integrin $\alpha$ v, integrin $\beta$ 3                                  | <i>J Cutan Pathol</i> <b>34</b> : 851-856 (2007)                      | (134)       |
| Pecina-Slaus N, 2007                                                                                                               | -                      | 70                  | -                 | $\beta$ -catenin, E-cadherin                                             | <i>J Cutan Pathol</i> <b>34</b> : 239-246 (2007)                      | (135)       |
| Pisacane AM, 2007                                                                                                                  | 10                     | 45                  | 15                | CD31, CD34                                                               | <i>Cell Oncol</i> <b>29</b> : 59-66 (2007)                            | (136)       |

Supplemental Table 1: Summary of identified manuscripts (n=515), cont'd

| <b>First author, year</b>                                      | <b>Assayed samples</b> |                     |                   | <b>Proteins assayed</b>                                    | <b>Citation</b>                                        | <b>Ref.</b> |
|----------------------------------------------------------------|------------------------|---------------------|-------------------|------------------------------------------------------------|--------------------------------------------------------|-------------|
|                                                                | <b>nevi</b>            | <b>1° melanomas</b> | <b>metastases</b> |                                                            |                                                        |             |
| Excluded studies: Cross-sectional study design (n=284), cont'd |                        |                     |                   |                                                            |                                                        |             |
| Polak ME, 2007                                                 | -                      | 15                  | 41                | TGFβ-R, TGFβ2                                              | <i>Br J Cancer</i> <b>96</b> : 1879-1887 (2007)        | (137)       |
| Pritchard-Jones RO, 2007                                       | -                      | 16                  | -                 | VEGF, VEGF-xxx isoforms                                    | <i>Br J Cancer</i> <b>97</b> : 223-230 (2007)          | (138)       |
| Puri N, 2007                                                   | 20                     | 16                  | 24                | c-Met                                                      | <i>Clin Cancer Res</i> <b>13</b> : 2246-2253 (2007)    | (139)       |
| Rakosy Z, 2007                                                 | -                      | 9                   | -                 | EGFR                                                       | <i>Int J Cancer</i> <b>121</b> : 1729-1737 (2007)      | (140)       |
| Rothhammer T, 2007                                             | 161                    | 88                  | 101               | BMP-7                                                      | <i>Cancer Biomark</i> <b>3</b> : 111-117 (2007)        | (141)       |
| Sanki A, 2007                                                  | 19                     | 39                  | 34                | p16/INK4A, p27/KIP1                                        | <i>Pathology</i> <b>39</b> : 551-557 (2007)            | (142)       |
| Seidl H, 2007                                                  | 5                      | 12                  | 34                | CCR9, CCXR1, CXCR6                                         | <i>Hum Pathol</i> <b>38</b> : 768-780 (2007)           | (143)       |
| Singh RS, 2007                                                 | 35                     | 23                  | 31                | PTEN, PI3K p110 subunit, PI3K p85 subunit                  | <i>J Cutan Pathol</i> <b>34</b> : 220-225 (2007)       | (144)       |
| Thies A, 2007                                                  | 12                     | 67                  | 75                | CEACAM-1, L1-CAM                                           | <i>Cancer Lett</i> <b>248</b> : 68-80 (2007)           | (145)       |
| Weishaupt C, 2007                                              | -                      | -                   | 65                | E-selectin, ICAM-1, P-selectin                             | <i>Clin Cancer Res</i> <b>13</b> : 2549-2556 (2007)    | (146)       |
| Wilsher M, 2007                                                | 42                     | 91                  | 20                | WT-1                                                       | <i>Histopathology</i> <b>51</b> : 605-610 (2007)       | (147)       |
| Zygouris P, 2007                                               | -                      | 25                  | -                 | Bcl-2, caspase-3, caspase-8, telomerase                    | <i>J BUON</i> <b>12</b> : 513-519 (2007)               | (148)       |
| Arndt S, 2006                                                  | 2                      | 2                   | 3                 | TANGO                                                      | <i>Int J Cancer</i> <b>119</b> : 2812-2820 (2006)      | (149)       |
| Barrow C, 2006                                                 | -                      | 251                 | 335               | NY-ESO-1, gp100, MAGE-1, MAGE-4, MelanA, tyrosinase        | <i>Clin Cancer Res</i> <b>12</b> : 764-771 (2006)      | (150)       |
| Ding Y, 2006                                                   | 37                     | 24                  | 31                | Survivin                                                   | <i>Cancer</i> <b>106</b> : 1123-1129 (2006)            | (151)       |
| Honig A, 2006                                                  | -                      | 6                   | -                 | Tartrate-resistant acid phosphatase                        | <i>BMC Cancer</i> <b>6</b> : 199 (2006)                | (152)       |
| Kaariainen E, 2006                                             | 32                     | 101                 | 34                | Fibronectin, procollagen-1, tenascin-C                     | <i>J Pathol</i> <b>210</b> : 181-191 (2006)            | (153)       |
| Kalogeraki A, 2006                                             | -                      | -                   | 30                | c-myc, HSP-70, MHC Class II                                | <i>Anticancer Res</i> <b>26</b> : 3551-3554 (2006)     | (154)       |
| Kuphal S, 2006a                                                | 5                      | 5                   | 5                 | Human lethal giant larvae                                  | <i>Oncogene</i> <b>25</b> : 103-110 (2006)             | (155)       |
| Kuphal S, 2006b                                                | -                      | 3                   | 3                 | Dickkopf-3                                                 | <i>Oncogene</i> <b>25</b> : 5027-5036 (2006)           | (156)       |
| Kuzbicki L, 2006a                                              | 27                     | 42                  | 15                | Lysosome-associated membrane protein-1                     | <i>Melanoma Res</i> <b>16</b> : 235-243 (2006)         | (157)       |
| Kuzbicki L, 2006b                                              | 17                     | 36                  | 11                | Cyclooxygenase-2                                           | <i>Melanoma Res</i> <b>16</b> : 29-36 (2006)           | (158)       |
| Kuzbicki L, 2006c                                              | 17                     | 41                  | 18                | Cdk-2                                                      | <i>Melanoma Res</i> <b>16</b> : 435-444 (2006)         | (159)       |
| Massi D, 2006                                                  | 10                     | 15                  | 5                 | Delta-like protein-1, jagged-1, jagged-2, notch-1, notch-2 | <i>Mod Pathol</i> <b>19</b> : 246-254 (2006)           | (160)       |
| Miracco C, 2006                                                | 60                     | 54                  | 12                | Macrophage migration inhibitory factor                     | <i>Int J Oncol</i> <b>28</b> : 345-352 (2006)          | (161)       |
| Mirmohammadsadegh A, 2006                                      | -                      | 4                   | 19                | STAT-5                                                     | <i>J Invest Dermatol</i> <b>126</b> : 2272-2280 (2006) | (162)       |
| Niedojadlo K, 2006                                             | 75                     | 53                  | 24                | APAF-1                                                     | <i>Pigment Cell Res</i> <b>19</b> : 43-50 (2006)       | (163)       |
| Packer L, 2006                                                 | 29                     | 67                  | 19                | Osteopontin, PTEN                                          | <i>Carcinogenesis</i> <b>27</b> : 1778-1786 (2006)     | (164)       |
| Prieto VG, 2006                                                | 35                     | 23                  | 31                | Galectin-3                                                 | <i>Clin Cancer Res</i> <b>12</b> : 6709-6715 (2006)    | (165)       |
| Scala S, 2006                                                  | -                      | -                   | 63                | CXCR4                                                      | <i>Clin Cancer Res</i> <b>12</b> : 2427-2433 (2006)    | (166)       |
| Schmidt AN, 2006                                               | 49                     | 39                  | 6                 | Estrogen receptor-α, estrogen receptor-β                   | <i>Exp Dermatol</i> <b>15</b> : 971-980 (2006)         | (167)       |
| Shannan B, 2006                                                | 30                     | 18                  | 25                | Clusterin                                                  | <i>Anticancer Res</i> <b>26</b> : 2707-2716 (2006)     | (168)       |
| Simonetti O, 2006                                              | 19                     | 40                  | -                 | CCL27, CCR10                                               | <i>Eur J Cancer</i> <b>42</b> : 1181-1187 (2006)       | (169)       |
| Topczewska JM, 2006                                            | -                      | 5                   | 10                | Nodal                                                      | <i>Nat Med</i> <b>12</b> : 925-932 (2006)              | (170)       |

Supplemental Table 1: Summary of identified manuscripts (n=515), cont'd

| <u>First author, year</u>                                      | <u>Assayed samples</u> |                     |                   | <u>Proteins assayed</u>                                              | <u>Citation</u>                                      | <u>Ref.</u> |
|----------------------------------------------------------------|------------------------|---------------------|-------------------|----------------------------------------------------------------------|------------------------------------------------------|-------------|
|                                                                | <u>nevi</u>            | <u>1° melanomas</u> | <u>metastases</u> |                                                                      |                                                      |             |
| Excluded studies: Cross-sectional study design (n=284), cont'd |                        |                     |                   |                                                                      |                                                      |             |
| Varney ML, 2006                                                | -                      | 82                  | 16                | CXCR1, CXCR2                                                         | <i>Am J Clin Pathol</i> <b>125</b> : 209-216 (2006)  | (171)       |
| Vereecken P, 2006                                              | 13                     | 76                  | 10                | Maspin                                                               | <i>J Int Med Res</i> <b>34</b> : 52-57 (2006)        | (172)       |
| Winnepeninckx V, 2006                                          | 14                     | 54                  | 11                | Securin                                                              | <i>Mod Pathol</i> <b>19</b> : 1170-1180 (2006)       | (173)       |
| Xi Y, 2006                                                     | -                      | 18                  | 23                | IGFBP-3                                                              | <i>Mol Cancer Ther</i> <b>5</b> : 3078-3084 (2006)   | (174)       |
| Zhang H, 2006                                                  | -                      | 7                   | 7                 | Bcl-2, bcl-xL                                                        | <i>Int J Oncol</i> <b>28</b> : 661-666 (2006)        | (175)       |
| Zubieta MR, 2006                                               | -                      | 8                   | 25                | Galectin-1, galectin-3                                               | <i>Am J Pathol</i> <b>168</b> : 1666-1675 (2006)     | (176)       |
| Al-Batran SE, 2005                                             | -                      | -                   | 125               | NY-ESO-1, gp100, MelanA, MHC Class I, MHC Class II, tyrosinase       | <i>Cancer Res</i> <b>65</b> : 3937-3941 (2005)       | (177)       |
| Baldi A, 2005                                                  | -                      | 61                  | 11                | Ferritin light chain                                                 | <i>Clin Cancer Res</i> <b>11</b> : 3175-3183 (2005)  | (178)       |
| Brychtova S, 2005                                              | 53                     | 74                  | -                 | Nestin                                                               | <i>Cesk Patol</i> <b>41</b> : 143-145 (2005)         | (179)       |
| Busam KJ, 2005                                                 | 32                     | 31                  | 38                | PNL2                                                                 | <i>Am J Surg Pathol</i> <b>29</b> : 400-406 (2005)   | (180)       |
| Cohn ML, 2005                                                  | 40                     | 25                  | 31                | Claudin-1                                                            | <i>J Cutan Pathol</i> <b>32</b> : 533-536 (2005)     | (181)       |
| Ehrmann J, 2005                                                | 16                     | 9                   | -                 | Nestin                                                               | <i>J Clin Pathol</i> <b>58</b> : 222-223 (2005)      | (182)       |
| Fiuraskova M, 2005                                             | 53                     | 78                  | -                 | FGF-2, PDGF                                                          | <i>Anticancer Res</i> <b>25</b> : 4299-4303 (2005)   | (183)       |
| Hess AR, 2005                                                  | -                      | 14                  | -                 | Focal adhesion kinase                                                | <i>Cancer Res</i> <b>65</b> : 9851-9860 (2005)       | (184)       |
| Kuivanen T, 2005                                               | 5                      | 63                  | -                 | MMP-13, MMP-21, MMP-26, MMP-28                                       | <i>Virchows Arch</i> <b>447</b> : 954-960 (2005)     | (185)       |
| Kumar SM, 2005                                                 | 14                     | 9                   | -                 | Erythropoietin, erythropoietin receptor                              | <i>Am J Pathol</i> <b>166</b> : 823-830 (2005)       | (186)       |
| Longo-Imedio MI, 2005                                          | 7                      | 40                  | -                 | CXCR3, CXCR4                                                         | <i>Int J Cancer</i> <b>117</b> : 861-865 (2005)      | (187)       |
| Massi D, 2005                                                  | 20                     | 40                  | 10                | Protease-activated receptor-1, protease-activated receptor-2         | <i>Hum Pathol</i> <b>36</b> : 676-685 (2005)         | (188)       |
| Murry BP, 2005                                                 | -                      | 10                  | 35                | Heparanase                                                           | <i>Int J Oncol</i> <b>26</b> : 345-352 (2005)        | (189)       |
| Pisacane AM, 2005                                              | 12                     | 24                  | -                 | VEGF-C1, VEGF-R2/FLK                                                 | <i>Melanoma Res</i> <b>15</b> : 39-43 (2005)         | (190)       |
| Quatresooz P, 2005                                             | 48                     | 35                  | -                 | Type IV collagen $\alpha$ 1 chain, type IV collagen $\alpha$ 5 chain | <i>Melanoma Res</i> <b>15</b> : 161-168 (2005)       | (191)       |
| Ramirez JA, 2005                                               | 39                     | 58                  | 29                | Cyclin D1                                                            | <i>Ann Diagn Pathol</i> <b>9</b> : 185-188 (2005)    | (192)       |
| Redondo P, 2005                                                | -                      | 56                  | 7                 | MMP-2, MMP-9                                                         | <i>Clin Exp Dermatol</i> <b>30</b> : 541-545 (2005)  | (193)       |
| Roesch A, 2005                                                 | 52                     | 60                  | 60                | Retinoblastoma-binding protein-2 homolog-1                           | <i>Mod Pathol</i> <b>18</b> : 1249-1257 (2005)       | (194)       |
| Rothhammer T, 2005                                             | 11                     | 5                   | 4                 | BMP-4, BMP-7                                                         | <i>Cancer Res</i> <b>65</b> : 448-456 (2005)         | (195)       |
| Sedghizadeh PP, 2005                                           | 8                      | 14                  | -                 | CITED-1                                                              | <i>Med Sci Monit</i> <b>11</b> : BR189-194 (2005)    | (196)       |
| Varney ML, 2005                                                | -                      | 82                  | 16                | MCP-1                                                                | <i>Melanoma Res</i> <b>15</b> : 417-425 (2005)       | (197)       |
| Vereecken P, 2005                                              | 15                     | 89                  | 11                | Galectin-3                                                           | <i>Arch Dermatol Res</i> <b>296</b> : 353-358 (2005) | (198)       |
| Vetter CS, 2005                                                | 77                     | 16                  | 19                | Survivin                                                             | <i>Arch Dermatol Res</i> <b>297</b> : 26-30 (2005)   | (199)       |
| Woenckhaus C, 2005                                             | 10                     | 25                  | 14                | p27/KIP1, skp2                                                       | <i>Histol Histopathol</i> <b>20</b> : 501-508 (2005) | (200)       |
| Zhang H, 2005                                                  | -                      | 7                   | 7                 | Survivin                                                             | <i>Oncol Rep</i> <b>13</b> : 1121-1126 (2005)        | (201)       |
| Baldi A, 2004                                                  | 30                     | 61                  | 15                | APAF-1                                                               | <i>Exp Dermatol</i> <b>13</b> : 93-97 (2004)         | (202)       |
| Becker B, 2004                                                 | 9                      | 9                   | 14                | HSP-90                                                               | <i>Exp Dermatol</i> <b>13</b> : 27-32 (2004)         | (203)       |
| Bilalovic N, 2004                                              | -                      | 70                  | 28                | Neutral endopeptidase                                                | <i>Mod Pathol</i> <b>17</b> : 1251-1258 (2004)       | (204)       |
| Dissemond J, 2004                                              | -                      | 92                  | 19                | Calnexin, calreticulin                                               | <i>Cancer Lett</i> <b>203</b> : 225-231 (2004)       | (205)       |
| Ellerhorst JA, 2004                                            | 60                     | 19                  | -                 | Thyrotropin-releasing hormone                                        | <i>Clin Cancer Res</i> <b>10</b> : 5531-5536 (2004)  | (206)       |

Supplemental Table 1: Summary of identified manuscripts (n=515), cont'd

| <u>First author, year</u>                                      | <u>Assayed samples</u> |                     |                   | <u>Proteins assayed</u>                                                                                                 | <u>Citation</u>                                         | <u>Ref.</u> |
|----------------------------------------------------------------|------------------------|---------------------|-------------------|-------------------------------------------------------------------------------------------------------------------------|---------------------------------------------------------|-------------|
|                                                                | <u>nevi</u>            | <u>1° melanomas</u> | <u>metastases</u> |                                                                                                                         |                                                         |             |
| Excluded studies: Cross-sectional study design (n=284), cont'd |                        |                     |                   |                                                                                                                         |                                                         |             |
| Hazarika P, 2004                                               | 40                     | 25                  | 31                | Flotillin-2                                                                                                             | <i>Cancer Res</i> <b>64</b> : 7361-7369 (2004)          | (207)       |
| Ivan D, 2004                                                   | 40                     | 23                  | 31                | Jab1, p27/KIP1                                                                                                          | <i>Mod Pathol</i> <b>17</b> : 811-818 (2004)            | (208)       |
| Kang SH, 2004                                                  | 15                     | 15                  | -                 | HSP-27                                                                                                                  | <i>J Cutan Pathol</i> <b>31</b> : 665-671 (2004)        | (209)       |
| Kluger HM, 2004                                                | -                      | 269                 | 331               | Her2/neu                                                                                                                | <i>Melanoma Res</i> <b>14</b> : 207-210 (2004)          | (210)       |
| Krengel S, 2004                                                | 37                     | 17                  | -                 | $\alpha$ -catenin, $\beta$ -catenin, E-cadherin, $\gamma$ -catenin, N-cadherin, P-cadherin                              | <i>J Cutan Pathol</i> <b>31</b> : 1-7 (2004)            | (211)       |
| Li Z, 2004                                                     | 25                     | 56                  | 11                | SOCS-1                                                                                                                  | <i>J Invest Dermatol</i> <b>123</b> : 737-745 (2004)    | (212)       |
| McNulty SE, 2004                                               | 20                     | -                   | 20                | c-Rel, I $\kappa$ B- $\alpha$ , I $\kappa$ B- $\beta$ , I $\kappa$ B- $\epsilon$ , NF $\kappa$ B p105/p50 subunit, RelA | <i>Pigment Cell Res</i> <b>17</b> : 173-180 (2004)      | (213)       |
| Ng KC, 2004                                                    | 46                     | 87                  | -                 | XIAP-associated factor                                                                                                  | <i>J Invest Dermatol</i> <b>123</b> : 1127-1134 (2004)  | (214)       |
| Poyraz A, 2004                                                 | -                      | 48                  | -                 | Bax, p21/WAF1                                                                                                           | <i>J Exp Clin Cancer Res</i> <b>23</b> : 625-631 (2004) | (215)       |
| Schuijter MM, 2004                                             | 5                      | 5                   | 5                 | Raf-1 kinase inhibitor protein                                                                                          | <i>Cancer Res</i> <b>64</b> : 5186-5192 (2004)          | (216)       |
| Stefanou D, 2004                                               | 23                     | 18                  | -                 | c-Kit, VEGF                                                                                                             | <i>Int J Surg Pathol</i> <b>12</b> : 133-138 (2004)     | (217)       |
| Weeraratna AT, 2004                                            | 77                     | 5                   | 60                | Calpain-3, CD74                                                                                                         | <i>Oncogene</i> <b>23</b> : 2264-2274 (2004)            | (218)       |
| Woenckhaus C, 2004                                             | 15                     | 38                  | 19                | p27/KIP1                                                                                                                | <i>Virchows Arch</i> <b>445</b> : 491-497 (2004)        | (219)       |
| Banfalvi T, 2003                                               | -                      | 37                  | 22                | S100B                                                                                                                   | <i>Oncology</i> <b>64</b> : 374-379 (2003)              | (220)       |
| Behrmann I, 2003                                               | 9                      | 15                  | 14                | Methyladenosine phosphorylase                                                                                           | <i>Am J Pathol</i> <b>163</b> : 683-690 (2003)          | (221)       |
| Bernard K, 2003                                                | 14                     | 10                  | -                 | Hepatoma-derived growth factor                                                                                          | <i>Cancer Res</i> <b>63</b> : 6716-6725 (2003)          | (222)       |
| Dissemond J, 2003                                              | -                      | 85                  | 19                | Tapasin                                                                                                                 | <i>Arch Dermatol Res</i> <b>295</b> : 43-49 (2003)      | (223)       |
| Ekmekcioglu S, 2003                                            | -                      | 38                  | 43                | iNOS, IL-24                                                                                                             | <i>Mol Cancer Ther</i> <b>2</b> : 9-17 (2003)           | (224)       |
| Fogel M, 2003                                                  | 26                     | 24                  | 24                | L1-CAM                                                                                                                  | <i>Cancer Lett</i> <b>189</b> : 237-247 (2003)          | (225)       |
| Goulet AC, 2003                                                | 10                     | 23                  | 16                | Cyclooxygenase-2                                                                                                        | <i>Cancer Biol Ther</i> <b>2</b> : 713-718 (2003)       | (226)       |
| Hafnet C, 2003                                                 | 8                      | 7                   | 9                 | EphB6                                                                                                                   | <i>Int J Oncol</i> <b>23</b> : 1553-1559 (2003)         | (227)       |
| Haritopoulos KN, 2003                                          | -                      | 57                  | 9                 | Integrin $\beta$ 3, ICAM-1                                                                                              | <i>APMIS</i> <b>111</b> : 421-429 (2003)                | (228)       |
| Keehn CA, 2003                                                 | 21                     | 8                   | 2                 | Ets-1                                                                                                                   | <i>Mod Pathol</i> <b>16</b> : 772-777 (2003)            | (229)       |
| Miranda E, 2003                                                | 10                     | 32                  | -                 | Apolipoprotein D                                                                                                        | <i>J Surg Oncol</i> <b>83</b> : 99-105 (2003)           | (230)       |
| Potti A, 2003a                                                 | -                      | 202                 | -                 | Her2/neu                                                                                                                | <i>Anticancer Res</i> <b>23</b> : 4067-4069 (2003)      | (231)       |
| Redondo P, 2003                                                | -                      | 42                  | 9                 | FGF-2, VEGF                                                                                                             | <i>J Am Acad Dermatol</i> <b>49</b> : 255-263 (2003)    | (232)       |
| Ribatti D, 2003                                                | 25                     | 46                  | 21                | FGF-2                                                                                                                   | <i>Eur J Cancer</i> <b>39</b> : 666-674 (2003)          | (233)       |
| Rosenwald IB, 2003                                             | 6                      | 9                   | -                 | Cyclin D1, eIF-2 $\alpha$ , eIF-4E                                                                                      | <i>Cancer</i> <b>98</b> : 1080-1088 (2003)              | (234)       |
| Sander CS, 2003                                                | 18                     | 18                  | -                 | Catalase, SOD-cu/zn, SOD-mn                                                                                             | <i>Br J Dermatol</i> <b>148</b> : 913-922 (2003)        | (235)       |
| Shen SS, 2003                                                  | 35                     | 23                  | 31                | abl-related gene, c-abl, c-Kit, PDGFR- $\alpha$ , PDGFR- $\beta$                                                        | <i>J Cutan Pathol</i> <b>30</b> : 539-547 (2003)        | (236)       |
| Slater M, 2003                                                 | -                      | 80                  | -                 | Calcium channel receptors P2X-1, P2X-2, P2X-3, P2X-4, P2X-5, P2X-6, P2X-7, P2Y-2, Caspase-3, E-cadherin, telomerase     | <i>Melanoma Res</i> <b>13</b> : 137-145 (2003)          | (237)       |
| Sundram U, 2003                                                | 15                     | 30                  | 14                | IRF4, S100B, gp100, MelanA                                                                                              | <i>Mod Pathol</i> <b>16</b> : 802-810 (2003)            | (238)       |
| Wang H, 2003                                                   | 40                     | 23                  | 31                | IGFBP-2                                                                                                                 | <i>J Cutan Pathol</i> <b>30</b> : 599-605 (2003)        | (239)       |
| Xu X, 2003                                                     | 10                     | 47                  | 16                | Trk-C                                                                                                                   | <i>J Cutan Pathol</i> <b>30</b> : 318-322 (2003)        | (240)       |
| Baldi A, 2002                                                  | -                      | total n=50          |                   | HtrA1                                                                                                                   | <i>Oncogene</i> <b>21</b> : 6684-6688 (2002)            | (241)       |
| Demunter A, 2002                                               | 0                      | 48                  | 32                | $\beta$ -catenin                                                                                                        | <i>Mod Pathol</i> <b>15</b> : 454-461 (2002)            | (242)       |

Supplemental Table 1: Summary of identified manuscripts (n=515), cont'd

| <b>First author, year</b>                                      | <b>Assayed samples</b> |                     |                   | <b>Proteins assayed</b>                                                             | <b>Citation</b>                                       | <b>Ref.</b> |
|----------------------------------------------------------------|------------------------|---------------------|-------------------|-------------------------------------------------------------------------------------|-------------------------------------------------------|-------------|
|                                                                | <b>nevi</b>            | <b>1° melanomas</b> | <b>metastases</b> |                                                                                     |                                                       |             |
| Excluded studies: Cross-sectional study design (n=284), cont'd |                        |                     |                   |                                                                                     |                                                       |             |
| Dhawan P, 2002                                                 | 17                     | -                   | 12                | Akt, NF-κB                                                                          | <i>Cancer Res</i> <b>62</b> : 7335-7342 (2002)        | (243)       |
| Dobrowolski R, 2002                                            | 14                     | 12                  | 6                 | p14/ARF                                                                             | <i>Arch Dermatol Res</i> <b>293</b> : 545-551 (2002)  | (244)       |
| Ellerhorst JA, 2002                                            | -                      | 41                  | 41                | IL-24                                                                               | <i>J Clin Oncol</i> <b>20</b> : 1069-1074 (2002)      | (245)       |
| Goncharuk VN, 2002                                             | 19                     | 16                  | -                 | Fascin                                                                              | <i>J Cutan Pathol</i> <b>29</b> : 430-438 (2002)      | (246)       |
| Kanitakis J, 2002                                              | -                      | 28                  | 44                | Neutral endopeptidase                                                               | <i>Melanoma Res</i> <b>12</b> : 241-244 (2002)        | (247)       |
| Kim SH, 2002                                                   | -                      | 6                   | 3                 | Interferon-inducible protein kinase                                                 | <i>Oncogene</i> <b>21</b> : 8741-8748 (2002)          | (248)       |
| Kneisel L, 2002                                                | -                      | 36                  | -                 | Polo-like kinase                                                                    | <i>J Cutan Pathol</i> <b>29</b> : 354-358 (2002)      | (249)       |
| Kurschat P, 2002                                               | -                      | 41                  | 6                 | MT1-MMP, MMP-2, TIMP-2                                                              | <i>J Pathol</i> <b>197</b> : 179-187 (2002)           | (250)       |
| Nouman GS, 2002                                                | 27                     | 50                  | -                 | ING1b/p33                                                                           | <i>Histopathology</i> <b>40</b> : 360-366 (2002)      | (251)       |
| Pavey SJ, 2002                                                 | -                      | 108                 | -                 | p16/INK4A                                                                           | <i>Melanoma Res</i> <b>12</b> : 539-547 (2002)        | (252)       |
| Redondo P, 2002                                                | -                      | 42                  | 9                 | Fas ligand, Fas/CD95                                                                | <i>Br J Dermatol</i> <b>147</b> : 80-86 (2002)        | (253)       |
| Simonetti O, 2002                                              | 25                     | 28                  | -                 | MMP-2, MMP-9, VEGF                                                                  | <i>Cancer</i> <b>95</b> : 1963-1970 (2002)            | (254)       |
| Timar J, 2002                                                  | -                      | 54                  | -                 | Autocrine motility factor receptor                                                  | <i>Clin Exp Metastasis</i> <b>19</b> : 225-232 (2002) | (255)       |
| Touab M, 2002                                                  | 20                     | 11                  | 8                 | Versican                                                                            | <i>Am J Pathol</i> <b>160</b> : 549-557 (2002)        | (256)       |
| Winer I, 2002                                                  | 12                     | 12                  | -                 | 12-lipoxygenase                                                                     | <i>Melanoma Res</i> <b>12</b> : 429-434 (2002)        | (257)       |
| Ahrens T, 2001                                                 | 7                      | 6                   | 5                 | CD44, hyaluronan-mediated motility receptor, ICAM-1                                 | <i>J Invest Dermatol</i> <b>116</b> : 93-101 (2001)   | (258)       |
| Baldi A, 2001                                                  | 36                     | 53                  | 10                | AP-2, c-Kit, E-cadherin, p21/WAF1                                                   | <i>J Cell Biochem</i> <b>83</b> : 364-372 (2001)      | (259)       |
| Bodey B, 2001                                                  | -                      | 17                  | -                 | MMP-2, MMP-3, MMP-9, MMP-10, MMP-13                                                 | <i>In Vivo</i> <b>15</b> : 57-64 (2001)               | (260)       |
| de Vries TJ, 2001                                              | -                      | 44                  | 86                | gp100, MelanA, S100B, tyrosinase                                                    | <i>J Pathol</i> <b>193</b> : 13-20 (2001)             | (261)       |
| Demunter A, 2001                                               | 76                     | 66                  | 17                | Endothelin-B receptor                                                               | <i>Virchows Arch</i> <b>438</b> : 485-491 (2001)      | (262)       |
| Denkert C, 2001                                                | 4                      | 28                  | -                 | Cyclooxygenase-2                                                                    | <i>Cancer Res</i> <b>61</b> : 303-308 (2001)          | (263)       |
| Fang D, 2001                                                   | 10                     | 9                   | 42                | Microtubule-associated protein-2                                                    | <i>Am J Pathol</i> <b>158</b> : 2107-2115 (2001)      | (264)       |
| Fink-Puches R, 2001                                            | -                      | 20                  | 10                | Her2/neu                                                                            | <i>Anticancer Res</i> <b>21</b> : 2793-2795 (2001)    | (265)       |
| Frahm SO, 2001                                                 | -                      | 167                 | -                 | Ki-67                                                                               | <i>Hum Pathol</i> <b>32</b> : 1376-1381 (2001)        | (266)       |
| Georgieva J, 2001                                              | 12                     | 49                  | 18                | Cyclin A, cyclin B1, cyclin D1, cyclin D2, cyclin D3, cyclin E, cdk-1, cdk-2, cdk-4 | <i>J Clin Pathol</i> <b>54</b> : 229-235 (2001)       | (267)       |
| Gilhooly EM, 2001                                              | 5                      | -                   | 10                | Protein kinase C-β                                                                  | <i>Melanoma Res</i> <b>11</b> : 355-369 (2001)        | (268)       |
| Hussein MR, 2001                                               | 41                     | 9                   | -                 | MLH1, MSH2, MSH6                                                                    | <i>Am J Dermatopathol</i> <b>23</b> : 308-314 (2001)  | (269)       |
| Innominato PF, 2001                                            | 16                     | 15                  | 12                | BDNF, NGF, NT-3, NT-4/5, p75 <sup>NTR</sup> , Trk-A, Trk-B, Trk-C                   | <i>J Pathol</i> <b>194</b> : 95-100 (2001)            | (270)       |
| King R, 2001                                                   | 62                     | 58                  | -                 | MITF                                                                                | <i>Am J Surg Pathol</i> <b>25</b> : 51-57 (2001)      | (271)       |
| Loggini B, 2001                                                | -                      | 49                  | -                 | Bcl-2, p-glycoprotein, p53, PCNA                                                    | <i>Tumori</i> <b>87</b> : 179-186 (2001)              | (272)       |
| Massi D, 2001                                                  | 34                     | 50                  | 8                 | iNOS                                                                                | <i>J Pathol</i> <b>194</b> : 194-200 (2001)           | (273)       |
| Polisky D, 2001a                                               | 10                     | 6                   | 5                 | p16/INK4A                                                                           | <i>Cancer Res</i> <b>61</b> : 6008-6011 (2001)        | (274)       |
| Polisky D, 2001b                                               | 16                     | 118                 | 38                | HDM2                                                                                | <i>Cancer Res</i> <b>61</b> : 7642-7646 (2001)        | (275)       |
| Quintela I, 2001                                               | 10                     | 35                  | -                 | Pepsinogen C                                                                        | <i>Int J Biol Markers</i> <b>16</b> : 240-244 (2001)  | (276)       |
| Ahmed B, 2000                                                  | 41                     | 52                  | 13                | iNOS                                                                                | <i>Br J Dermatol</i> <b>142</b> : 432-440 (2000)      | (277)       |
| Aroni K, 2000                                                  | -                      | 57                  | 9                 | Vasopressin                                                                         | <i>Melanoma Res</i> <b>10</b> : 535 (2000)            | (278)       |
| Bergman R, 2000                                                | 10                     | 9                   | 29                | MelanA                                                                              | <i>J Am Acad Dermatol</i> <b>42</b> : 496-500 (2000)  | (279)       |

Supplemental Table 1: Summary of identified manuscripts (n=515), cont'd

| <u>First author, year</u>                                      | <u>Assayed samples</u> |                     |                   | <u>Proteins assayed</u>                                                                                                                                                                                      | <u>Citation</u>                                         | <u>Ref.</u> |
|----------------------------------------------------------------|------------------------|---------------------|-------------------|--------------------------------------------------------------------------------------------------------------------------------------------------------------------------------------------------------------|---------------------------------------------------------|-------------|
|                                                                | <u>nevi</u>            | <u>1° melanomas</u> | <u>metastases</u> |                                                                                                                                                                                                              |                                                         |             |
| Excluded studies: Cross-sectional study design (n=284), cont'd |                        |                     |                   |                                                                                                                                                                                                              |                                                         |             |
| Busam KJ, 2000                                                 | 132                    | 85                  | 120               | MAGE-3                                                                                                                                                                                                       | <i>Mod Pathol</i> <b>13</b> : 459-465 (2000)            | (280)       |
| Hofman UB, 2000a                                               | -                      | 26                  | 20                | MMP-2                                                                                                                                                                                                        | <i>J Invest Dermatol</i> <b>115</b> : 625-632 (2000)    | (281)       |
| Hofman UB, 2000b                                               | 15                     | 25                  | 20                | MT1-MMP, MMP-2, TIMP-2                                                                                                                                                                                       | <i>J Pathol</i> <b>191</b> : 245-256 (2000)             | (282)       |
| Kanter-Lewensohn L, 2000                                       | 62                     | 73                  | 29                | IGFR-1, p27/KIP1                                                                                                                                                                                             | <i>Growth Factors</i> <b>17</b> : 193-202 (2000)        | (283)       |
| Leiter U, 2000                                                 | 10                     | 9                   | 29                | Bax, bcl-2, bcl-xL/xS                                                                                                                                                                                        | <i>Arch Dermatol Res</i> <b>292</b> : 225-232 (2000)    | (284)       |
| Persons DL, 2000                                               | -                      | 40                  | -                 | Her2/neu                                                                                                                                                                                                     | <i>Anticancer Res</i> <b>20</b> : 1965-1968 (2000)      | (285)       |
| van Klempen LC, 2000                                           | 38                     | 55                  | 28                | ALCAM/CD166                                                                                                                                                                                                  | <i>Am J Pathol</i> <b>156</b> : 769-774 (2000)          | (286)       |
| Ahmed B, 1999                                                  | 100                    | 59                  | 18                | nNOS, protein inhibitor of NOS                                                                                                                                                                               | <i>Br J Dermatol</i> <b>141</b> : 12-19 (1999)          | (287)       |
| Bayer-Garner IB, 1999                                          | 34                     | 50                  | 8                 | VEGF                                                                                                                                                                                                         | <i>Mod Pathol</i> <b>12</b> : 770-774 (1999)            | (288)       |
| Birck A, 1999                                                  | 10                     | 19                  | 20                | FGF-2, VEGF                                                                                                                                                                                                  | <i>Melanoma Res</i> <b>9</b> : 375-381 (1999)           | (289)       |
| Boni R, 1999                                                   | 27                     | 32                  | 23                | Cellular apoptosis susceptibility gene                                                                                                                                                                       | <i>Am J Dermatopathol</i> <b>21</b> : 125-128 (1999)    | (290)       |
| Chiodino C, 1999                                               | 8                      | 11                  | 2                 | GM-CSF                                                                                                                                                                                                       | <i>J Invest Dermatol</i> <b>113</b> : 415-418 (1999)    | (291)       |
| Easty DJ, 1999                                                 | 13                     | 22                  | 6                 | EphA2, Ephrin-A1                                                                                                                                                                                             | <i>Int J Cancer</i> <b>84</b> : 494-501 (1999)          | (292)       |
| Goldmann T, 1999                                               | -                      | 147                 | -                 | Cathepsin B, cathepsin D, MMP-2                                                                                                                                                                              | <i>Pathol Res Pract</i> <b>195</b> : 171-175 (1999)     | (293)       |
| Grossman D, 1999                                               | -                      | 15                  | 15                | Survivin                                                                                                                                                                                                     | <i>J Invest Dermatol</i> <b>113</b> : 1076-1081 (1999)  | (294)       |
| Hartmann A, 1999                                               | 8                      | 10                  | 15                | Angiogenin                                                                                                                                                                                                   | <i>Cancer Res</i> <b>59</b> : 1578-1583 (1999)          | (295)       |
| Korabiowska M, 1999                                            | 25                     | 53                  | 36                | Bax, bcl-2                                                                                                                                                                                                   | <i>Pol J Pathol</i> <b>50</b> : 17-21 (1999)            | (296)       |
| Lowney JK, 1999                                                | -                      | 30                  | 10                | IRF-1, IRF-2                                                                                                                                                                                                 | <i>Ann Surg Oncol</i> <b>6</b> : 604-608 (1999)         | (297)       |
| Moretti S, 1999                                                | 10                     | 20                  | 10                | c-Kit, GM-CSF, GM-CSFR, IL-1 $\alpha$ , IL-1 $\beta$ , IL-1R, IL-2, IL-2R, IL-6, IL-6R, IL-8, IL-8R, steel ligand, TGF- $\beta$ , type III TGF- $\beta$ R, TNF- $\alpha$ , TNF- $\beta$ , p55 TNFR, p75 TNFR | <i>Int J Cancer</i> <b>84</b> : 160-168 (1999)          | (298)       |
| Ozer E, 1999                                                   | 24                     | 28                  | 8                 | Ki-67                                                                                                                                                                                                        | <i>Anal Quant Cytol Histol</i> <b>21</b> : 42-46 (1999) | (299)       |
| Reed JA, 1999                                                  | 25                     | 40                  | 10                | GAP-43, NCAM, p75 <sup>NTR</sup>                                                                                                                                                                             | <i>Am J Pathol</i> <b>155</b> : 549-555 (1999)          | (300)       |
| Sanders DS, 1999                                               | 30                     | 30                  | 10                | $\beta$ -catenin, desmoglein, E-cadherin, $\gamma$ -catenin, N-cadherin, P-cadherin                                                                                                                          | <i>Mol Pathol</i> <b>52</b> : 151-157 (1999)            | (301)       |
| Singh RK, 1999                                                 | -                      | 36                  | 10                | IL-8                                                                                                                                                                                                         | <i>Melanoma Res</i> <b>9</b> : 383-387 (1999)           | (302)       |
| Sparrow LE, 1999                                               | 33                     | 47                  | 30                | EGFR                                                                                                                                                                                                         | <i>Australas J Dermatol</i> <b>40</b> : 19-24 (1999)    | (303)       |
| Tschugguel W, 1999                                             | -                      | -                   | 25                | iNOS                                                                                                                                                                                                         | <i>Br J Cancer</i> <b>79</b> : 1609-1612 (1999)         | (304)       |
| Van Belle PA, 1999                                             | 41                     | 56                  | 26                | Integrin $\beta$ 3                                                                                                                                                                                           | <i>Hum Pathol</i> <b>30</b> : 562-567 (1999)            | (305)       |
| Vlaykova T, 1999a                                              | -                      | -                   | 70                | VEGF                                                                                                                                                                                                         | <i>Melanoma Res</i> <b>9</b> : 59-68 (1999)             | (306)       |
| Zhang XD, 1999                                                 | 13                     | 34                  | 20                | $\alpha$ -catenin, $\beta$ -catenin, $\gamma$ -catenin, p120-catenin                                                                                                                                         | <i>Pathology</i> <b>31</b> : 239-246 (1999)             | (307)       |
| Bergman R, 1998                                                | 27                     | 17                  | -                 | c-fos                                                                                                                                                                                                        | <i>Am J Dermatopathol</i> <b>20</b> : 262-265 (1998)    | (308)       |
| Betke H, 1998                                                  | 29                     | 59                  | 32                | nm23                                                                                                                                                                                                         | <i>Pol J Pathol</i> <b>49</b> : 93-96 (1998)            | (309)       |
| Busam KJ, 1998                                                 | 50                     | 40                  | -                 | MelanA                                                                                                                                                                                                       | <i>Am J Surg Pathol</i> <b>22</b> : 976-982 (1998)      | (310)       |
| Cormier JN, 1998                                               | -                      | 78                  | 139               | gp100, melanA, MHC Class I                                                                                                                                                                                   | <i>Int J Cancer</i> <b>75</b> : 517-524 (1998)          | (311)       |
| Goldmann T, 1998                                               | -                      | 147                 | -                 | Cathepsin B, cathepsin D, MMP-2, metallothionein, PCNA                                                                                                                                                       | <i>J Exp Clin Cancer Res</i> <b>17</b> : 483-489 (1998) | (312)       |
| Grant SW, 1998                                                 | -                      | 41                  | 58                | Thrombospondin-1                                                                                                                                                                                             | <i>Cancer Detect Prev</i> <b>22</b> : 185-194 (1998)    | (313)       |

Supplemental Table 1: Summary of identified manuscripts (n=515), cont'd

| <b>First author, year</b>                                      | <b>Assayed samples</b> |                     |                   | <b>Proteins assayed</b>                                                                             | <b>Citation</b>                                                       | <b>Ref.</b> |
|----------------------------------------------------------------|------------------------|---------------------|-------------------|-----------------------------------------------------------------------------------------------------|-----------------------------------------------------------------------|-------------|
|                                                                | <b>nevi</b>            | <b>1° melanomas</b> | <b>metastases</b> |                                                                                                     |                                                                       |             |
| Excluded studies: Cross-sectional study design (n=284), cont'd |                        |                     |                   |                                                                                                     |                                                                       |             |
| Hensley C, 1998                                                | 9                      | 27                  | 9                 | GM-CSF, IL-8                                                                                        | <i>Exp Dermatol</i> <b>7</b> : 335-341 (1998)                         | (314)       |
| Hofbauer GF, 1998a                                             | 41                     | 31                  | 19                | Tyrosinase                                                                                          | <i>J Cutan Pathol</i> <b>25</b> : 204-209 (1998)                      | (315)       |
| Hofbauer GF, 1998b                                             | 39                     | 34                  | 23                | MelanA                                                                                              | <i>Melanoma Res</i> <b>8</b> : 337-343 (1998)                         | (316)       |
| Keller-Melchior R, 1998                                        | 51                     | 24                  | 33                | p16/INK4A, Rb                                                                                       | <i>J Invest Dermatol</i> <b>110</b> : 932-938 (1998)                  | (317)       |
| Khare VK, 1998                                                 | 33                     | 35                  | 5                 | Substance P                                                                                         | <i>J Cutan Pathol</i> <b>25</b> : 2-10 (1998)                         | (318)       |
| Silye R, 1998                                                  | 20                     | 59                  | 11                | $\alpha$ -catenin, $\beta$ -catenin, E-cadherin, $\gamma$ -catenin                                  | <i>J Pathol</i> <b>186</b> : 350-355 (1998)                           | (319)       |
| Sparrow LE, 1998b                                              | 36                     | 50                  | 25                | p16/INK4A, p21/WAF1                                                                                 | <i>Am J Dermatopathol</i> <b>20</b> : 255-261 (1998)                  | (320)       |
| Tang L, 1998                                                   | 5                      | 10                  | 5                 | Bax, bcl-2, bcl-xL, bcl-xS, mcl-1                                                                   | <i>Clin Cancer Res</i> <b>4</b> : 1865-1871 (1998)                    | (321)       |
| van den Oord JJ, 1998                                          | 44                     | 60                  | 6                 | Dipeptidyl peptidase IV/CD26                                                                        | <i>Br J Dermatol</i> <b>138</b> : 615-621 (1998)                      | (322)       |
| Boni R, 1997                                                   | -                      | 39                  | -                 | S100A1, S100A2, S100A4, S100A6, S100B                                                               | <i>J Cutan Pathol</i> <b>24</b> : 76-80 (1997)                        | (323)       |
| de Vries TJ, 1997                                              | 26                     | 38                  | 41                | gp100, MelanA, tyrosinase                                                                           | <i>Cancer Res</i> <b>57</b> : 3223-3229 (1997)                        | (324)       |
| Erhard H, 1997                                                 | -                      | 24                  | -                 | VEGF                                                                                                | <i>Melanoma Res</i> <b>7 Suppl 2</b> : S19-S26 (1997)                 | (325)       |
| Jager E, 1997                                                  | -                      | -                   | 20                | MelanA, MHC Class I, tyrosinase                                                                     | <i>Int J Cancer</i> <b>71</b> : 142-147 (1997)                        | (326)       |
| Korabiowska M, 1997                                            | 29                     | 59                  | -                 | GADD34, GADD45, GADD153, p53                                                                        | <i>Anticancer Res</i> <b>17</b> : 3697-3700 (1997)                    | (327)       |
| Ledda F, 1997                                                  | 25                     | 7                   | 29                | Osteonectin                                                                                         | <i>J Invest Dermatol</i> <b>108</b> : 210-214 (1997)                  | (328)       |
| Marcovai J, 1997                                               | -                      | 46                  | -                 | VEGF                                                                                                | <i>J Cutan Pathol</i> <b>24</b> : 212-218 (1997)                      | (329)       |
| Montone KT, 1997                                               | 34                     | 31                  | 20                | c-Kit                                                                                               | <i>Mod Pathol</i> <b>10</b> : 939-944 (1997)                          | (330)       |
| Moretti S, 1997                                                | 12                     | 30                  | 11                | TGF- $\beta$ , TGF- $\beta$ 3                                                                       | <i>Melanoma Res</i> <b>7</b> : 313-321 (1997)                         | (331)       |
| Nicotra MR, 1997                                               | 30                     | 46                  | 32                | MelanA                                                                                              | <i>J Immunother</i> <b>20</b> : 466-469 (1997)                        | (332)       |
| Reichrath J, 1997                                              | 38                     | 22                  | 47                | nm23                                                                                                | <i>Dermatology</i> <b>194</b> : 136-139 (1997)                        | (333)       |
| Rudolph P, 1997                                                | 292                    | 92                  | -                 | Ki-67                                                                                               | <i>J Am Acad Dermatol</i> <b>37</b> : 169-178 (1997)                  | (334)       |
| Salven P, 1997                                                 | 6                      | 22                  | 33                | VEGF                                                                                                | <i>Br J Cancer</i> <b>76</b> : 930-934 (1997)                         | (335)       |
| Seelentag WK, 1997                                             | -                      | 28                  | 9                 | CD44, CD44v3, CD44v4, CD44v5, CD44v6, CD44v9                                                        | <i>J Cutan Pathol</i> <b>24</b> : 206-211 (1997)                      | (336)       |
| Trotter MJ, 1997                                               | 25                     | 23                  | 12                | p21/WAF1                                                                                            | <i>J Cutan Pathol</i> <b>24</b> : 265-271 (1997)                      | (337)       |
| van den Oord JJ, 1997a                                         | 33                     | 41                  | -                 | EMMPRIN, MMP-9                                                                                      | <i>Am J Pathol</i> <b>151</b> : 665-670 (1997)                        | (338)       |
| Weiss J, 1997                                                  | 60                     | 86                  | 17                | Rap1-GAP                                                                                            | <i>Arch Dermatol Res</i> <b>289</b> : 573-577 (1997)                  | (339)       |
| Brasoveanu LI, 1996                                            | 6                      | 12                  | 20                | Protectin/CD59                                                                                      | <i>Lab Invest</i> <b>74</b> : 33-42 (1996)                            | (340)       |
| Danen EH, 1996                                                 | 36                     | 27                  | 35                | E-cadherin                                                                                          | <i>Melanoma Res</i> <b>6</b> : 127-131 (1996)                         | (341)       |
| de Vries TJ, 1996a                                             | 38                     | 32                  | 35                | Plasminogen, tetranectin                                                                            | <i>J Pathol</i> <b>179</b> : 260-265 (1996)                           | (342)       |
| de Vries TJ, 1996                                              | 34                     | 36                  | 37                | Lipoprotein receptor-related protein receptor-associated protein, $\alpha$ 2-macroglobulin receptor | <i>Cancer Res</i> <b>56</b> : 1432-1439 (1996)                        | (343)       |
| Easty DJ, 1996                                                 | 10                     | 16                  | 5                 | nm23                                                                                                | <i>Br J Cancer</i> <b>74</b> : 109-114 (1996)                         | (344)       |
| Francia G, 1996                                                | 11                     | 8                   | 1                 | Annexin VI                                                                                          | <i>Cancer Res</i> <b>56</b> : 3855-3858 (1996)                        | (345)       |
| Harwood CA, 1996                                               | 19                     | 81                  | 6                 | CD44, CD44v3, CD44v4/5, CD44v6, CD44v8/9                                                            | <i>Br J Dermatol</i> <b>135</b> : 876-882 (1996)                      | (346)       |
| Lee CS, 1996                                                   | 9                      | 40                  | 2                 | nm23                                                                                                | <i>Pathology</i> <b>28</b> : 220-224 (1996)                           | (347)       |
| Marincola FM, 1996                                             | -                      | -                   | 14                | gp100, MelanA                                                                                       | <i>J Immunother Emphasis Tumor Immunol</i> <b>19</b> : 192-205 (1996) | (348)       |

Supplemental Table 1: Summary of identified manuscripts (n=515), cont'd

| <b>First author, year</b>                                      | <b>Assayed samples</b> |                     |                   | <b>Proteins assayed</b>                                                                                                                                                                                                               | <b>Citation</b>                                        | <b>Ref.</b> |
|----------------------------------------------------------------|------------------------|---------------------|-------------------|---------------------------------------------------------------------------------------------------------------------------------------------------------------------------------------------------------------------------------------|--------------------------------------------------------|-------------|
|                                                                | <b>nevi</b>            | <b>1° melanomas</b> | <b>metastases</b> |                                                                                                                                                                                                                                       |                                                        |             |
| Excluded studies: Cross-sectional study design (n=284), cont'd |                        |                     |                   |                                                                                                                                                                                                                                       |                                                        |             |
| Reed JA, 1996                                                  | 27                     | 58                  | -                 | IL-3                                                                                                                                                                                                                                  | <i>J Cutan Pathol</i> <b>23</b> : 495-505 (1996)       | (349)       |
| Simon JC, 1996                                                 | 13                     | 16                  | 18                | CD44                                                                                                                                                                                                                                  | <i>Eur J Cancer</i> <b>32A</b> : 1394-1400 (1996)      | (350)       |
| Van Belle P, 1996                                              | 8                      | 26                  | 17                | TGF- $\beta$ 1, TGF- $\beta$ 2, TGF- $\beta$ 3                                                                                                                                                                                        | <i>Am J Pathol</i> <b>148</b> : 1887-1894 (1996)       | (351)       |
| Xerri L, 1996                                                  | -                      | 10                  | -                 | FGFR1                                                                                                                                                                                                                                 | <i>Melanoma Res</i> <b>6</b> : 223-230 (1996)          | (352)       |
| Brasoveanu LI, 1995                                            | -                      | -                   | 54                | Protectin/CD59                                                                                                                                                                                                                        | <i>Int J Cancer</i> <b>61</b> : 548-556 (1995)         | (353)       |
| Cerroni L, 1995                                                | 35                     | 29                  | -                 | Bcl-2                                                                                                                                                                                                                                 | <i>Am J Dermatopathol</i> <b>17</b> : 7-11 (1995)      | (354)       |
| Chetty R, 1995                                                 | -                      | 32                  | -                 | T-cell acute leukemia gene (TAL1)                                                                                                                                                                                                     | <i>Melanoma Res</i> <b>5</b> : 251-254 (1995)          | (355)       |
| Danen EH, 1995                                                 | 28                     | 29                  | 24                | Integrin $\alpha$ v, integrin $\beta$ 3, integrin $\beta$ 5                                                                                                                                                                           | <i>Int J Cancer</i> <b>61</b> : 491-496 (1995)         | (356)       |
| Gelsleichter L, 1995                                           | 22                     | 38                  | 42                | HDM2, p53                                                                                                                                                                                                                             | <i>Mod Pathol</i> <b>8</b> : 530-535 (1995)            | (357)       |
| Korabiowska M, 1995                                            | 62                     | 121                 | 82                | c-myc, Ki-67                                                                                                                                                                                                                          | <i>In Vivo</i> <b>9</b> : 433-438 (1995)               | (358)       |
| Lee CS, 1995                                                   | 7                      | 27                  | -                 | p53                                                                                                                                                                                                                                   | <i>Australas J Dermatol</i> <b>36</b> : 192-195 (1995) | (359)       |
| Mirecka J, 1995                                                | 63                     | 97                  | -                 | gp100, S100B                                                                                                                                                                                                                          | <i>Pol J Pathol</i> <b>46</b> : 167-172 (1995)         | (360)       |
| Natali PG, 1995                                                | 9                      | 15                  | 26                | Fibronectin, integrin $\alpha$ 3, integrin $\alpha$ 4, integrin $\alpha$ 5, integrin $\alpha$ v, integrin $\beta$ 1, integrin $\beta$ 3                                                                                               | <i>Br J Cancer</i> <b>71</b> : 1243-1247 (1995)        | (361)       |
| Platz A, 1995                                                  | 20                     | 33                  | 52                | p53, N-ras                                                                                                                                                                                                                            | <i>Melanoma Res</i> <b>5</b> : 101-106 (1995)          | (362)       |
| Podhajcer OL, 1995                                             | 37                     | 11                  | 10                | Cathepsin D                                                                                                                                                                                                                           | <i>J Invest Dermatol</i> <b>104</b> : 340-344 (1995)   | (363)       |
| Poremba C, 1995                                                | -                      | 58                  | 5                 | HDM2, p53                                                                                                                                                                                                                             | <i>Oncol Res</i> <b>7</b> : 331-339 (1995)             | (364)       |
| Ramsay JA, 1995b                                               | 39                     | 39                  | 21                | Bcl-2                                                                                                                                                                                                                                 | <i>Mod Pathol</i> <b>8</b> : 150-154 (1995)            | (365)       |
| Reed JA, 1995                                                  | 38                     | 51                  | 14                | p16/INK4A                                                                                                                                                                                                                             | <i>Cancer Res</i> <b>55</b> : 2713-2718 (1995)         | (366)       |
| Rudolph P, 1995                                                | 211                    | 85                  | 18                | gp100, Ki-67, topoisomerase-II $\alpha$                                                                                                                                                                                               | <i>Am J Pathol</i> <b>147</b> : 1615-1625 (1995)       | (367)       |
| Schadendorf D, 1995b                                           | 10                     | 29                  | 39                | Gamma glutamyl transferase, glutathione-S-reductase, glutathione-S-transferase                                                                                                                                                        | <i>J Invest Dermatol</i> <b>105</b> : 109-112 (1995)   | (368)       |
| Sparrow LE, 1995b                                              | 61                     | 58                  | 21                | p53                                                                                                                                                                                                                                   | <i>Melanoma Res</i> <b>5</b> : 93-100 (1995)           | (369)       |
| Weiss J, 1995                                                  | -                      | 113                 | 43                | p53                                                                                                                                                                                                                                   | <i>Br J Dermatol</i> <b>133</b> : 23-31 (1995)         | (370)       |
| Danen EH, 1994                                                 | 38                     | 52                  | 25                | Integrin $\alpha$ 1, integrin $\alpha$ 2, integrin $\alpha$ 3, integrin $\alpha$ 4, integrin $\alpha$ 5, integrin $\alpha$ 6, integrin $\alpha$ -IIb, integrin $\alpha$ v, integrin $\beta$ 1, integrin $\beta$ 3, integrin $\beta$ 4 | <i>Histopathology</i> <b>24</b> : 249-256 (1994)       | (371)       |
| de Vries TJ, 1994                                              | 31                     | 19                  | 17                | PAI-1, PAI-2, tPA, uPA, uPAR                                                                                                                                                                                                          | <i>Am J Pathol</i> <b>144</b> : 70-81 (1994)           | (372)       |
| Saenz-Santamaria MC, 1994                                      | 10                     | 10                  | 4                 | Bcl-2, Ki-67                                                                                                                                                                                                                          | <i>J Cutan Pathol</i> <b>21</b> : 393-397 (1994)       | (373)       |
| Si Z, 1994                                                     | -                      | 34                  | 21                | CD44, cutaneous lymphocyte-associated antigen, integrin $\alpha$ v, integrin $\beta$ 2, integrin $\beta$ 3, ICAM-1, LeCAM-1, thrombospondin receptor, thrombospondin-1, vitronectin                                                   | <i>Pathology</i> <b>26</b> : 6-15 (1994)               | (374)       |
| van den Oord JJ, 1994                                          | 15                     | 13                  | 11                | Bcl-2                                                                                                                                                                                                                                 | <i>Am J Pathol</i> <b>145</b> : 294-300 (1994)         | (375)       |
| von Schoultz E, 1994                                           | -                      | 11                  | 12                | Estramustine binding protein                                                                                                                                                                                                          | <i>Melanoma Res</i> <b>4</b> : 401-405 (1994)          | (376)       |
| Bishop PW, 1993                                                | -                      | 55                  | 35                | $\alpha$ -smooth muscle actin, CAM 5.2, gp100, granulophysin/CD63, S100B                                                                                                                                                              | <i>Histopathology</i> <b>23</b> : 159-166 (1993)       | (377)       |

Supplemental Table 1: Summary of identified manuscripts (n=515), cont'd

| <b>First author, year</b>                                             | <b>Assayed samples</b> |                     |                   | <b>Proteins assayed</b>                                                                                                                                                                   | <b>Citation</b>                                          | <b>Ref.</b> |
|-----------------------------------------------------------------------|------------------------|---------------------|-------------------|-------------------------------------------------------------------------------------------------------------------------------------------------------------------------------------------|----------------------------------------------------------|-------------|
|                                                                       | <b>nevi</b>            | <b>1° melanomas</b> | <b>metastases</b> |                                                                                                                                                                                           |                                                          |             |
| <b>Excluded studies: Cross-sectional study design (n=284), cont'd</b> |                        |                     |                   |                                                                                                                                                                                           |                                                          |             |
| Carrel S, 1993                                                        | -                      | 61                  | 96                | Neutral endopeptidase                                                                                                                                                                     | <i>Melanoma Res</i> <b>3</b> : 319-323 (1993)            | (378)       |
| Lassam NJ, 1993                                                       | 82                     | 61                  | 10                | p53                                                                                                                                                                                       | <i>Cancer Res</i> <b>53</b> : 2235-2238 (1993)           | (379)       |
| McGregor JM, 1993                                                     | 46                     | 24                  | 12                | p53                                                                                                                                                                                       | <i>Br J Dermatol</i> <b>128</b> : 606-611 (1993)         | (380)       |
| Natali PG, 1993                                                       | 20                     | 23                  | 44                | c-Met                                                                                                                                                                                     | <i>Br J Cancer</i> <b>68</b> : 746-750 (1993)            | (381)       |
| Rieger E, 1993                                                        | 16                     | 43                  | 18                | Ki-67, PCNA                                                                                                                                                                               | <i>J Cutan Pathol</i> <b>20</b> : 229-236 (1993)         | (382)       |
| Schadendorf D, 1993                                                   | 10                     | 40                  | 11                | Integrin $\alpha$ 1, integrin $\alpha$ 2, integrin $\alpha$ 3, integrin $\alpha$ 4, integrin $\alpha$ 5, integrin $\alpha$ 6, integrin $\alpha$ v, integrin $\beta$ 2, integrin $\beta$ 3 | <i>J Pathol</i> <b>170</b> : 429-434 (1993)              | (383)       |
| Vacca A, 1993                                                         | 29                     | 52                  | 16                | 67 kDa laminin receptor                                                                                                                                                                   | <i>Cancer</i> <b>72</b> : 455-461 (1993)                 | (384)       |
| de Wit PE, 1992                                                       | 29                     | 48                  | 22                | EGFR                                                                                                                                                                                      | <i>J Invest Dermatol</i> <b>99</b> : 168-173 (1992)      | (385)       |
| Denton KJ, 1992                                                       | 18                     | 32                  | 37                | E-selectin, ICAM-1, MCAM, NCAM, VCAM-1                                                                                                                                                    | <i>J Pathol</i> <b>167</b> : 187-191 (1992)              | (386)       |
| Jonjic N, 1992                                                        | 26                     | 26                  | 31                | VCAM-1                                                                                                                                                                                    | <i>Am J Pathol</i> <b>141</b> : 1323-1330 (1992)         | (387)       |
| Natali PG, 1991                                                       | 16                     | 32                  | 29                | Integrin $\alpha$ 6, integrin $\beta$ 1                                                                                                                                                   | <i>Int J Cancer</i> <b>49</b> : 168-172 (1991)           | (388)       |
| Stretch JR, 1991                                                      | 3                      | 20                  | 33                | p53                                                                                                                                                                                       | <i>Cancer Res</i> <b>51</b> : 5976-5979 (1991)           | (389)       |
| Takahashi H, 1991                                                     | 63                     | 46                  | 30                | PCNA                                                                                                                                                                                      | <i>Histopathology</i> <b>18</b> : 221-227 (1991)         | (390)       |
| Wollina U, 1991                                                       | 98                     | 28                  | 7                 | Calmodulin, fibronectin, gp100, ICAM-1, Ki-67, MHC Class II, granulophysin, S100B                                                                                                         | <i>Anticancer Res</i> <b>11</b> : 1405-1414 (1991)       | (391)       |
| Cho KH, 1990                                                          | 60                     | 52                  | 9                 | S100                                                                                                                                                                                      | <i>Cancer</i> <b>66</b> : 765-771 (1990)                 | (392)       |
| Cohen C, 1990                                                         | -                      | 5                   | 28                | Estrogen receptor- $\alpha$                                                                                                                                                               | <i>Am J Dermatopathol</i> <b>12</b> : 562-564 (1990)     | (393)       |
| Natali PG, 1990                                                       | 51                     | 95                  | 98                | ICAM-1                                                                                                                                                                                    | <i>Cancer Res</i> <b>50</b> : 1271-1278 (1990)           | (394)       |
| van Muijen GN, 1990                                                   | 88                     | 31                  | 34                | Transferrin receptor                                                                                                                                                                      | <i>J Invest Dermatol</i> <b>95</b> : 65-69 (1990)        | (395)       |
| Zarbo RJ, 1990                                                        | -                      | 64                  | -                 | Cytokeratin                                                                                                                                                                               | <i>Mod Pathol</i> <b>3</b> : 494-501 (1990)              | (396)       |
| Johnson PJ, 1989                                                      | 83                     | 93                  | 46                | ICAM-1                                                                                                                                                                                    | <i>Proc Natl Acad Sci USA</i> <b>86</b> : 641-644 (1989) | (397)       |
| Kaudewitz P, 1989                                                     | -                      | 72                  | -                 | Ki-67                                                                                                                                                                                     | <i>Am J Pathol</i> <b>134</b> : 1063-1068 (1989)         | (398)       |
| Smolle J, 1989                                                        | 8                      | 10                  | 7                 | Ki-67                                                                                                                                                                                     | <i>Am J Dermatopathol</i> <b>11</b> : 301-307 (1989)     | (399)       |
| Natali PG, 1987                                                       | 44                     | 39                  | 52                | Melanoma-associated antigen p97                                                                                                                                                           | <i>Cancer</i> <b>59</b> : 55-63 (1987)                   | (400)       |
| Hagen EC, 1986                                                        | -                      | 39                  | 21                | Granulophysin, S100B                                                                                                                                                                      | <i>Histopathology</i> <b>11</b> : 689-700 (1986)         | (401)       |
| Ruiter DJ, 1984                                                       | 25                     | 14                  | 24                | MHC Class I, MHC Class II, $\beta$ 2-microglobulin                                                                                                                                        | <i>Cancer Res</i> <b>44</b> : 3930-3935 (1984)           | (402)       |
| <b>Excluded studies: Case series study design (n=53)</b>              |                        |                     |                   |                                                                                                                                                                                           |                                                          |             |
| Chakravarti N, 2007                                                   | 49                     | 130                 | 47                | RAR $\alpha$ , RAR $\beta$ , RAR $\gamma$ , RXR $\alpha$ , RXR $\beta$ , RXR $\gamma$                                                                                                     | <i>Clin Cancer Res</i> <b>13</b> : 4817-4824 (2007)      | (403)       |
| Mihic-Probst D, 2007                                                  | 20                     | 64                  | 165               | Bmi-1                                                                                                                                                                                     | <i>Int J Cancer</i> <b>121</b> : 1764-1770 (2007)        | (404)       |
| Mnich CD, 2007                                                        | -                      | 60                  | -                 | SMAD-2                                                                                                                                                                                    | <i>Melanoma Res</i> <b>17</b> : 131-136 (2007)           | (405)       |
| Tchernev G, 2007                                                      | -                      | 31                  | 1                 | Bak, bax, bcl-2, cyclin E, Ki-67, HDM2, p16/INK4A, p21/WAF1, p27/KIP1, p53, Rb                                                                                                            | <i>J Cutan Pathol</i> <b>34</b> : 247-256 (2007)         | (406)       |
| Velazquez EF, 2007a                                                   | -                      | 61                  | 41                | NY-ESO-1                                                                                                                                                                                  | <i>Cancer Immun</i> <b>7</b> : 11 (2007)                 | (407)       |
| Velazquez EF, 2007b                                                   | -                      | 33                  | 60                | Neutral endopeptidase                                                                                                                                                                     | <i>J Transl Med</i> <b>5</b> : 2 (2007)                  | (408)       |

Supplemental Table 1: Summary of identified manuscripts (n=515), cont'd

| <u>First author, year</u>                                 | <u>Assayed samples</u> |                     |                   | <u>Proteins assayed</u>                                                                                | <u>Citation</u>                                                         | <u>Ref.</u> |
|-----------------------------------------------------------|------------------------|---------------------|-------------------|--------------------------------------------------------------------------------------------------------|-------------------------------------------------------------------------|-------------|
|                                                           | <u>nevi</u>            | <u>1° melanomas</u> | <u>metastases</u> |                                                                                                        |                                                                         |             |
| Excluded studies: Case series study design (n=53), cont'd |                        |                     |                   |                                                                                                        |                                                                         |             |
| Zhuang L, 2007                                            | 20                     | 42                  | 38                | AP-2 $\alpha$ , bcl-2, bcl-xL, mcl-1, MITF, STAT-3                                                     | <i>Mod Pathol</i> <b>20</b> : 416-426 (2007)                            | (409)       |
| Monteagudo C, 2006                                        | -                      | 82                  | -                 | CXCR3                                                                                                  | <i>J Clin Pathol</i> <b>epub</b> (2006)                                 | (410)       |
| Tang L, 2006                                              | 10                     | 154                 | 54                | Collagen-triple-helix-repeat-containing 1                                                              | <i>Clin Cancer Res</i> <b>12</b> : 3716-3722 (2006)                     | (411)       |
| Wild PJ, 2006                                             | 161                    | 88                  | 101               | Methyladenosine phosphorylase                                                                          | <i>Arch Dermatol</i> <b>142</b> : 471-476 (2006)                        | (412)       |
| Zhuang L, 2006                                            | 20                     | 42                  | 38                | TRAIL-R1, TRAIL-R2, TRAIL-R3/4                                                                         | <i>Hum Pathol</i> <b>37</b> : 1286-1294 (2006)                          | (413)       |
| Corte MD, 2005                                            | 8                      | 51                  | -                 | MMP-13                                                                                                 | <i>Int J Biol Markers</i> <b>20</b> : 242-248 (2005)                    | (414)       |
| Roesch A, 2005b                                           | 60                     | -                   | 60                | Rb                                                                                                     | <i>Mod Pathol</i> <b>18</b> : 565-572 (2005)                            | (415)       |
| Wu H, 2005                                                | 23                     | 34                  | 34                | Pleiotrophin                                                                                           | <i>J Cutan Pathol</i> <b>32</b> : 125-130 (2005)                        | (416)       |
| Bron LP, 2004                                             | -                      | 45                  | -                 | TRAIL ligand                                                                                           | <i>Pathology</i> <b>36</b> : 561-565 (2004)                             | (417)       |
| Forster-Horvath C, 2004                                   | -                      | 28                  | -                 | Vascular adhesion protein-1                                                                            | <i>Melanoma Res</i> <b>14</b> : 135-140 (2004)                          | (418)       |
| Innocenzi D, 2003                                         | 30                     | 77                  | 30                | Fatty acid synthase                                                                                    | <i>J Cutan Pathol</i> <b>30</b> : 23-28 (2003)                          | (419)       |
| Jonjic N, 2003                                            | -                      | 48                  | -                 | PCNA                                                                                                   | <i>Clin Exp Dermatol</i> <b>28</b> : 310-314 (2003)                     | (420)       |
| Woenckhaus C, 2003                                        | 16                     | 20                  | 30                | AP-2 $\alpha$ , caspase-3, caspase-6, c-Kit                                                            | <i>J Pathol</i> <b>201</b> : 278-287 (2003)                             | (421)       |
| Brinck U, 2002                                            | -                      | 59                  | -                 | p53, p63                                                                                               | <i>Int J Mol Med</i> <b>10</b> : 707-711 (2002)                         | (422)       |
| Dawn G, 2002                                              | 16                     | 24                  | -                 | Endoglin/CD105                                                                                         | <i>Clin Exp Dermatol</i> <b>27</b> : 153-156 (2002)                     | (423)       |
| Eliopoulos P, 2002                                        | -                      | 62                  | -                 | Her2/neu                                                                                               | <i>Melanoma Res</i> <b>12</b> : 139-145 (2002)                          | (424)       |
| Middleman BR, 2002                                        | 54                     | 37                  | -                 | GRO $\alpha$                                                                                           | <i>Mod Pathol</i> <b>15</b> : 532-537 (2002)                            | (425)       |
| Berset M, 2001                                            | -                      | 73                  | -                 | MelanA                                                                                                 | <i>Int J Cancer</i> <b>95</b> : 73-77 (2001)                            | (426)       |
| Kamarashev J, 2001                                        | -                      | 38                  | -                 | Proteasomal subunits LMP2 & LMP7, transporter associated with antigen processing-1 & -2                | <i>Int J Cancer</i> <b>95</b> : 23-28 (2001)                            | (427)       |
| Nikkola J, 2001                                           | -                      | -                   | 37                | MMP-1, MMP-13                                                                                          | <i>Melanoma Res</i> <b>11</b> : 157-166 (2001)                          | (428)       |
| Korabiowska M, 2000a                                      | 61                     | 106                 | 42                | Ki-67                                                                                                  | <i>AnticancerRes</i> <b>20</b> : 1781-1786 (2000)                       | (429)       |
| Salti GI, 2000                                            | -                      | 63                  | -                 | MITF                                                                                                   | <i>Cancer Res</i> <b>60</b> : 5012-5016 (2000)                          | (430)       |
| Strebhardt K, 2000                                        | -                      | 175                 | -                 | Polo-like kinase                                                                                       | <i>JAMA</i> <b>283</b> : 479-480 (2000)                                 | (431)       |
| Vihinen P, 2000                                           | -                      | -                   | 38                | Integrin $\alpha$ 1, integrin $\alpha$ 2, integrin $\alpha$ 6, integrin $\alpha$ v, integrin $\beta$ 1 | <i>Melanoma Res</i> <b>10</b> : 243-251 (2000)                          | (432)       |
| Ciotti P, 1999                                            | -                      | 16                  | 18                | GM-CSF, ICAM-1                                                                                         | <i>Melanoma Res</i> <b>9</b> : 253-260 (2000)                           | (433)       |
| Vlaykova T, 1999b                                         | -                      | -                   | 60                | Ki-67                                                                                                  | <i>Oncology</i> <b>57</b> : 242-252 (1999)                              | (434)       |
| Boni R, 1998                                              | 15                     | 62                  | -                 | c-myc                                                                                                  | <i>Dermatology</i> <b>196</b> : 288-291 (1998)                          | (435)       |
| Essner R, 1998                                            | -                      | 28                  | 35                | p53                                                                                                    | <i>Cancer</i> <b>82</b> : 309-316 (1998)                                | (436)       |
| Florenes VA, 1998                                         | 4                      | 113                 | 45                | p27/KIP1                                                                                               | <i>Am J Pathol</i> <b>153</b> : 305-312 (1998)                          | (437)       |
| Healy E, 1998                                             | 32                     | 39                  | -                 | Ki-67, p21/WAF1, p53                                                                                   | <i>Oncogene</i> <b>16</b> : 2213-2218 (1998)                            | (438)       |
| Konstadoulakis MM, 1998                                   | -                      | 40                  | 25                | c-myc, HSP-70, MHC Class II                                                                            | <i>Ann Surg Oncol</i> <b>5</b> : 253-260 (1998)                         | (439)       |
| Bjornhagen V, 1997                                        | -                      | 23                  | 39                | PCNA                                                                                                   | <i>Scand J Plast Reconstr Surg Hand Surg</i> <b>31</b> : 109-118 (1997) | (440)       |
| Dietrich A, 1997                                          | -                      | 92                  | -                 | CD44                                                                                                   | <i>Eur J Cancer</i> <b>33</b> : 926-930 (1997)                          | (441)       |
| Natali PG, 1997                                           | 20                     | 39                  | 34                | Integrin $\alpha$ v, integrin $\beta$ 3, ICAM-1                                                        | <i>Cancer Res</i> <b>57</b> : 1554-1560 (1997)                          | (442)       |
| van den Oord JJ, 1997                                     | 41                     | 71                  | -                 | nm23                                                                                                   | <i>Melanoma Res</i> <b>7</b> : 121-128 (1997)                           | (443)       |
| Vielkind JR, 1997                                         | -                      | 60                  | 22                | Xmrk-2                                                                                                 | <i>J Cutan Pathol</i> <b>24</b> : 620-627 (1997)                        | (444)       |

Supplemental Table 1: Summary of identified manuscripts (n=515), cont'd

| <b>First author, year</b>                                        | <b>Assayed samples</b>                                                     |                     |                   | <b>Proteins assayed</b>                                          | <b>Citation</b>                                                | <b>Ref.</b> |
|------------------------------------------------------------------|----------------------------------------------------------------------------|---------------------|-------------------|------------------------------------------------------------------|----------------------------------------------------------------|-------------|
|                                                                  | <b>nevi</b>                                                                | <b>1° melanomas</b> | <b>metastases</b> |                                                                  |                                                                |             |
| <b>Excluded studies: Case series study design (n=53), cont'd</b> |                                                                            |                     |                   |                                                                  |                                                                |             |
| Boni R, 1996                                                     | -                                                                          | 34                  | -                 | Ki-67                                                            | <i>J Am Acad Dermatol</i> <b>35</b> : 416-418 (1996)           | (445)       |
| Hieken TJ, 1996                                                  | -                                                                          | 160                 | -                 | Integrin β3                                                      | <i>J Surg Res</i> <b>63</b> : 169-173 (1996)                   | (446)       |
| Maelandsmo GM, 1996                                              | 4                                                                          | 126                 | 46                | p21/WAF1                                                         | <i>Am J Pathol</i> <b>149</b> : 1813-1822 (1996)               | (447)       |
| van den Oord JJ, 1996                                            | 71                                                                         | 71                  | 28                | CD40                                                             | <i>Am J Pathol</i> <b>149</b> : 1953-1961 (1996)               | (448)       |
| Lazaris AC, 1995                                                 | -                                                                          | 60                  | -                 | c-myc, HSP-70, MHC Class II                                      | <i>Virchows Arch</i> <b>426</b> : 461-467 (1995)               | (449)       |
| Schadendorf D, 1995a                                             | -                                                                          | 60                  | -                 | CD44v6, E-selectin, integrin α4, integrin α6, ICAM-1, P-selectin | <i>J Natl Cancer Inst</i> <b>87</b> : 366-371 (1995)           | (450)       |
| Casazza S, 1993                                                  | -                                                                          | 48                  | 10                | p53                                                              | <i>Pathologica</i> <b>85</b> : 335-342 (1993)                  | (451)       |
| Woosley JT, 1993                                                 | -                                                                          | 16                  | -                 | PCNA                                                             | <i>J Cutan Pathol</i> <b>20</b> : 498-503 (1993)               | (452)       |
| Zelger B, 1993                                                   | 22                                                                         | 59                  | 14                | Metallothionein                                                  | <i>Histopathology</i> <b>23</b> : 257-263 (1993)               | (453)       |
| Soyer HP, 1991                                                   | 38                                                                         | 72                  | 35                | Ki-67                                                            | <i>J Cutan Pathol</i> <b>18</b> : 264-272 (1991)               | (454)       |
| Natali PG, 1988                                                  | 54                                                                         | 85                  | 62                | Melanoma CEA-like antigen                                        | <i>Int J Biol Markers</i> <b>3</b> : 211-220 (1988)            | (455)       |
| <b>Excluded studies: Tumor compartment not assayed (n=6)</b>     |                                                                            |                     |                   |                                                                  |                                                                |             |
| Pocza P, 2008                                                    | Evaluated expression in stromal compartments                               |                     |                   |                                                                  | <i>Int J Cancer</i> <b>122</b> : 1972-1980 (2008)              | (456)       |
| Brezillon S, 2007                                                | Evaluated expression in stromal compartments                               |                     |                   |                                                                  | <i>Clin Exp Dermatol</i> <b>32</b> : 405-416 (2007)            | (457)       |
| Huszar M, 2006                                                   | Multi-tissue survey of L1-CAM expression                                   |                     |                   |                                                                  | <i>Hum Pathol</i> <b>37</b> : 1000-1008 (2006)                 | (458)       |
| Straume O, 2003                                                  | Evaluated expression in vascular compartment                               |                     |                   |                                                                  | <i>Angogenesis</i> <b>6</b> : 295-301 (2003)                   | (459)       |
| Hussein MR, 2002                                                 | Data redundant with another cross-sectional study (Hussein MR, 2001)       |                     |                   |                                                                  | <i>Mol Carcinog</i> <b>34</b> : 35-44 (2002)                   | (460)       |
| van Duinen CM, 1994                                              | Evaluated expression in stromal compartments                               |                     |                   |                                                                  | <i>Histopathology</i> <b>24</b> : 33-40 (1994)                 | (461)       |
| <b>Excluded studies: Non-Caucasian sample (n=30)</b>             |                                                                            |                     |                   |                                                                  |                                                                |             |
| Tao J, 2008                                                      | Study done on an Asian population from Tongji Hospital, China              |                     |                   |                                                                  | <i>Br J Dermatol</i> <b>158</b> : 88-94 (2008)                 | (462)       |
| Kawasaki K, 2007                                                 | Study done on an Asian population from Kanagawa, Japan                     |                     |                   |                                                                  | <i>Br J Dermatol</i> <b>156</b> : 613-619 (2007)               | (463)       |
| Liao Y-H, 2007                                                   | Study done on an Asian population from Taiwan, R.O.C.                      |                     |                   |                                                                  | <i>Cancer Res</i> <b>67</b> : 11547-11556 (2007)               | (464)       |
| Wu Y, 2007                                                       | Study done on an Asian population from Huazhong University, China          |                     |                   |                                                                  | <i>Zhonghua Bing Li Xue Za Zhi</i> <b>36</b> : 466-469 (2007)  | (465)       |
| Nishimura K, 2006                                                | Study done on an Asian population from Mie University, Japan               |                     |                   |                                                                  | <i>Anticancer Res</i> <b>26</b> : 4349-4356 (2006)             | (466)       |
| Mustika R, 2005                                                  | Study done on an Asian population from Kobe University, Japan              |                     |                   |                                                                  | <i>Pigment Cell Res</i> <b>18</b> : 59-62 (2005)               | (467)       |
| Nishizawa A, 2005                                                | Study done on an Asian population from Tokyo, Japan                        |                     |                   |                                                                  | <i>Cancer</i> <b>103</b> : 1693-1700 (2005)                    | (468)       |
| Kageshita T, 2003                                                | Study done on an Asian population from Kumamoto University, Japan          |                     |                   |                                                                  | <i>Br J Dermatol</i> <b>148</b> : 533-538 (2003)               | (469)       |
| Koganehira Y, 2003                                               | Study done on an Asian population from Shinshu University, Japan           |                     |                   |                                                                  | <i>Br J Dermatol</i> <b>148</b> : 971-980 (2003)               | (470)       |
| Sato H, 2002                                                     | Study done on an Asian population from Kobe University, Japan              |                     |                   |                                                                  | <i>Pigment Cell Res</i> <b>15</b> : 98-103 (2002)              | (471)       |
| Shukuwa T, 2002                                                  | Study done on an Asian population from Nagasaki University, Japan          |                     |                   |                                                                  | <i>Mod Pathol</i> <b>15</b> : 387-396 (2002)                   | (472)       |
| Kageshita T, 2001a                                               | Study done on an Asian population from Kumamoto University, Japan          |                     |                   |                                                                  | <i>J Dermatol Sci</i> <b>25</b> : 36-44 (2001)                 | (473)       |
| Kageshita T, 2001b                                               | Study done on an Asian population from Kumamoto University, Japan          |                     |                   |                                                                  | <i>Pigment Cell Res</i> <b>14</b> : 195-200 (2001)             | (474)       |
| Sugita K, 2001                                                   | Study done on an Asian population from Kitakyushu, Japan                   |                     |                   |                                                                  | <i>Am J Dermatopathol</i> <b>23</b> : 29-35 (2001)             | (475)       |
| Kageshita T, 2000                                                | Study done on an Asian population from Kumamoto University, Japan          |                     |                   |                                                                  | <i>Cancer Immunol Immunother</i> <b>49</b> : 314-318 (2000)    | (476)       |
| Torisu-Itakura H, 2000                                           | Study done on an Asian population from Fukuoka, Japan                      |                     |                   |                                                                  | <i>Jpn J Cancer Res</i> <b>91</b> : 906-910 (2000)             | (477)       |
| Funasaka Y, 1999                                                 | Study done on an Asian population from Kobe University, Japan              |                     |                   |                                                                  | <i>J Investig Dermatol Symp Proc</i> <b>4</b> : 105-109 (1999) | (478)       |
| Grover R, 1999                                                   | Study done on a predominantly Black sample; acral lentiginous lesions only |                     |                   |                                                                  | <i>Br J Plast Surg</i> <b>52</b> : 122-126 (1999)              | (479)       |
| Ichikawa T, 1998                                                 | Study done on an Asian population from Shinshu University, Japan           |                     |                   |                                                                  | <i>Br J Dermatol</i> <b>138</b> : 763-768 (1998)               | (480)       |
| Nagahama M, 1998                                                 | Study done on an Asian population from Kobe University, Japan              |                     |                   |                                                                  | <i>Br J Dermatol</i> <b>138</b> : 981-985 (1998)               | (481)       |
| Chang TG, 1997                                                   | Study done on an Asian population from Taiwan, R.O.C.                      |                     |                   |                                                                  | <i>Biochem Biophys Res Commun</i> <b>230</b> : 85-88 (1997)    | (482)       |
| Kanoko M, 1996                                                   | Study done on an Asian population from Kobe University, Japan              |                     |                   |                                                                  | <i>J Dermatol Sci</i> <b>12</b> : 97-103 (1996)                | (483)       |

Supplemental Table 1: Summary of identified manuscripts (n=515), cont'd

| <b>First author, year</b>                                          | <b>Assayed samples</b>                                                          |                     |                   | <b>Proteins assayed</b> | <b>Citation</b>                                                            | <b>Ref.</b> |
|--------------------------------------------------------------------|---------------------------------------------------------------------------------|---------------------|-------------------|-------------------------|----------------------------------------------------------------------------|-------------|
|                                                                    | <b>nevi</b>                                                                     | <b>1° melanomas</b> | <b>metastases</b> |                         |                                                                            |             |
| <b>Excluded studies: Non-Caucasian sample (n=30), cont'd</b>       |                                                                                 |                     |                   |                         |                                                                            |             |
| Ohashi A, 1996                                                     | Study done on an Asian population from Kobe University, Japan                   |                     |                   |                         | <i>Melanoma Res</i> <b>6</b> : 25-30 (1996)                                | (484)       |
| Saitoh K, 1996                                                     | Study done on an Asian population from Sapporo Medical School, Japan            |                     |                   |                         | <i>Histopathology</i> <b>29</b> : 497-505 (1996)                           | (485)       |
| Ueda M, 1994                                                       | Study done on an Asian population from Kobe University, Japan                   |                     |                   |                         | <i>Br J Dermatol</i> <b>130</b> : 320-324 (1994)                           | (486)       |
| Saitoh K, 1994                                                     | Study done on an Asian population from Sapporo Medical School, Japan            |                     |                   |                         | <i>J Pathol</i> <b>174</b> : 191-199 (1994)                                | (487)       |
| Kageshita T, 1993                                                  | Study done on an Asian population from Kumamoto University, Japan               |                     |                   |                         | <i>Cancer Res</i> <b>53</b> : 4927-4932 (1993)                             | (488)       |
| Kondoh M, 1993                                                     | Study done on an Asian population from Kobe University, Japan                   |                     |                   |                         | <i>Melanoma Res</i> <b>3</b> : 241-245 (1993)                              | (489)       |
| Yamamoto M, 1993                                                   | Study done on an Asian population from Sapporo Medical School, Japan            |                     |                   |                         | <i>Virchows Arch A Pathol Anat Histopathol</i> <b>422</b> : 127-131 (1993) | (490)       |
| Hirano T, 1986                                                     | Study done on an Asian population from Nippon, Japan                            |                     |                   |                         | <i>Acta Pathol Jpn</i> <b>36</b> : 733-743 (1986)                          | (491)       |
| <b>Excluded studies: Immunohistochemistry not performed (n=24)</b> |                                                                                 |                     |                   |                         |                                                                            |             |
| Webber BA, 2008                                                    | IHC not related to any progression or survival endpoints                        |                     |                   |                         | <i>Appl Immunohistochem Mol Morphol</i> <b>16</b> : 19-23 (2008)           | (492)       |
| Nambiar S, 2007                                                    | Protein expression not assayed; RNA expression assessed by RTQ-PCR              |                     |                   |                         | <i>Carcinogenesis</i> <b>28</b> : 2501-2510 (2007)                         | (493)       |
| Soikkeli J, 2007                                                   | Protein expression not assayed; RNA expression assessed by RTQ-PCR              |                     |                   |                         | <i>J Pathol</i> <b>213</b> : 180-189 (2007)                                | (494)       |
| Winnepeninckx V, 2007                                              | Although it appears as if new data are presented, any methods section is absent |                     |                   |                         | <i>Expert Rev Anticancer Ther</i> <b>7</b> : 1611-1631 (2007)              | (495)       |
| Carvalho L, 2006                                                   | Telomerase activity assessed by PCR-ELISA-based TRAP assay                      |                     |                   |                         | <i>J Plast Reconstr Aesthet Surg</i> <b>59</b> : 961-968 (2006)            | (496)       |
| Ellerhorst JA, 2006                                                | Cell-based basic science research only                                          |                     |                   |                         | <i>Oncogene epub</i> (2006)                                                | (497)       |
| Korabiowska M, 2006                                                | Protein expression not assayed; cDNA assessed for sequence variants             |                     |                   |                         | <i>Anticancer Res</i> <b>26</b> : 1231-1235 (2006)                         | (498)       |
| Stabuc B, 2006                                                     | Protein expression levels determined by ELISA method only                       |                     |                   |                         | <i>Neoplasma</i> <b>53</b> : 259-262 (2006)                                | (499)       |
| Bales E, 2005                                                      | Protein expression levels assessed in tissues using Western blots               |                     |                   |                         | <i>Cancer Res</i> <b>65</b> : 629-697 (2005)                               | (500)       |
| Thies A, 2004                                                      | Selected candidate was a glycolylation motif and not a protein                  |                     |                   |                         | <i>J Pathol</i> <b>203</b> : 933-939 (2004)                                | (501)       |
| Govindarajan B, 2003                                               | IHC was performed on a single melanoma specimen                                 |                     |                   |                         | <i>J Biol Chem</i> <b>278</b> : 9790-9795 (2003)                           | (502)       |
| Stabuc B, 2003                                                     | Protein expression levels determined by ELISA method only                       |                     |                   |                         | <i>Oncol Rep</i> <b>10</b> : 635-639 (2003)                                | (503)       |
| Chana JS, 2001                                                     | Protein expression levels assessed by dual-parameter flow cytometry             |                     |                   |                         | <i>Ann Plast Surg</i> <b>47</b> : 172-177 (2001)                           | (504)       |
| Duncan LM, 2001                                                    | Protein expression not assayed; RNA levels measured by ISH                      |                     |                   |                         | <i>J Clin Oncol</i> <b>19</b> : 568-576 (2001)                             | (505)       |
| Scholl FA, 2001                                                    | Protein expression not assayed; RNA levels measured by ISH                      |                     |                   |                         | <i>Cancer Res</i> <b>61</b> : 823-826 (2001)                               | (506)       |
| Bartenjev I, 2000                                                  | Protein expression levels determined by ELISA method only                       |                     |                   |                         | <i>Int J Dermatol</i> <b>39</b> : 599-602 (2000)                           | (507)       |
| Rudolph P, 2000                                                    | Telomerase activity assessed by PCR-ELISA-based TRAP assay                      |                     |                   |                         | <i>Am J Pathol</i> <b>156</b> : 1425-1432 (2000)                           | (508)       |
| Nurnberg W, 1999                                                   | Protein expression not assayed; RNA levels measured by ISH                      |                     |                   |                         | <i>J Pathol</i> <b>189</b> : 546-551 (1999)                                | (509)       |
| Ross DA, 1998                                                      | Protein expression levels assessed by flow cytometry                            |                     |                   |                         | <i>Br J Surg</i> <b>85</b> : 46-51 (1998)                                  | (510)       |
| Grover R, 1997                                                     | Protein expression levels assessed by flow cytometry                            |                     |                   |                         | <i>Br J Plast Surg</i> <b>50</b> : 478-482 (1997)                          | (511)       |
| Ross DA, 1997                                                      | Protein expression levels assessed by flow cytometry                            |                     |                   |                         | <i>Br J Surg</i> <b>84</b> : 803-807 (1997)                                | (512)       |
| Fleming MG, 1994                                                   | Protein levels not assessed; RNA levels measured by ISH                         |                     |                   |                         | <i>Am J Dermatopathol</i> <b>16</b> : 383-391 (1994)                       | (513)       |
| Walker MJ, 1991                                                    | Protein expression assessed by pharmacologic assay with radiolabeled ligand     |                     |                   |                         | <i>Cancer</i> <b>68</b> : 184-188 (1991)                                   | (514)       |
| Walker MJ, 1987                                                    | Protein expression assessed by pharmacologic assay with radiolabeled ligand     |                     |                   |                         | <i>J Clin Oncol</i> <b>5</b> : 1256-1261 (1987)                            | (515)       |

## **References**

1. Rangel J, Nosrati M, Torabian S, Shaikh L, Leong SP, Haqq C, et al. Osteopontin as a molecular prognostic marker for melanoma. *Cancer* 2008;112(1):144-50.
2. Pearl RA, Pacifico MD, Richman PI, Wilson GD, Grover R. Stratification of patients by melanoma cell adhesion molecule (MCAM) expression on the basis of risk: implications for sentinel lymph node biopsy. *J Plast Reconstr Aesthet Surg* 2008;61:265-271.
3. Vaisanen AH, Kallioinen M, Turpeenniemi-Hujanen T. Comparison of the prognostic value of matrix metalloproteinases 2 and 9 in cutaneous melanoma. *Hum Pathol* 2008;39:377-385.
4. Alonso SR, Tracey L, Ortiz P, Perez-Gomez B, Palacios J, Pollan M, et al. A high-throughput study in melanoma identifies epithelial-mesenchymal transition as a major determinant of metastasis. *Cancer Res* 2007;67(7):3450-60.
5. Piras F, Murtas D, Minerba L, Ugalde J, Floris C, Maxia C, et al. Nuclear survivin is associated with disease recurrence and poor survival in patients with cutaneous malignant melanoma. *Histopathology* 2007;50(7):835-42.
6. Weinlich G, Topar G, Eisendle K, Fritsch PO, Zelger B. Comparison of metallothionein-overexpression with sentinel lymph node biopsy as prognostic factors in melanoma. *J Eur Acad Dermatol Venereol* 2007;21(5):669-77.
7. Ekmekcioglu S, Ellerhorst JA, Prieto VG, Johnson MM, Broemeling LD, Grimm EA. Tumor iNOS predicts poor survival for stage III melanoma patients. *Int J Cancer* 2006;119(4):861-6.
8. Pacifico MD, Grover R, Richman PI, Daley FM, Buffa F, Wilson GD. CD44v3 levels in primary cutaneous melanoma are predictive of prognosis: Assessment by the use of tissue microarray. *Int J Cancer* 2006;118(6):1460-4.
9. Rangel J, Torabian S, Shaikh L, Nosrati M, Baehner FL, Haqq C, et al. Prognostic significance of nuclear receptor coactivator-3 overexpression in primary cutaneous melanoma. *J Clin Oncol* 2006;24(28):4565-9.
10. Weinlich G, Eisendle K, Hassler E, Baltaci M, Fritsch PO, Zelger B. Metallothionein - overexpression as a highly significant prognostic factor in melanoma: a prospective study on 1270 patients. *Br J Cancer* 2006;94(6):835-41.
11. Berger AJ, Davis DW, Tellez C, Prieto VG, Gershenwald JE, Johnson MM, et al. Automated quantitative analysis of activator protein-2alpha subcellular expression in melanoma tissue microarrays correlates with survival prediction. *Cancer Res* 2005;65(23):11185-92.
12. Pacifico MD, Grover R, Richman PI, Buffa F, Daley FM, Wilson GD. Identification of P-cadherin in primary melanoma using a tissue microarray: prognostic implications in a patient cohort with long-term follow up. *Ann Plast Surg* 2005;55(3):316-20.
13. Pacifico MD, Grover R, Richman PI, Buffa F, Daley FM, Wilson GD. nm23 as a prognostic marker in primary cutaneous melanoma: evaluation using tissue microarray in a patient group with long-term follow-up. *Melanoma Res* 2005;15(5):435-40.
14. Pacifico MD, Grover R, Richman PI, Daley FM, Buffa F, Wilson GD. Development of a tissue array for primary melanoma with long-term follow-up: discovering melanoma cell adhesion molecule as an important prognostic marker. *Plast Reconstr Surg* 2005;115(2):367-75.
15. Scala S, Ottaiano A, Ascierto PA, Cavalli M, Simeone E, Giuliano P, et al. Expression of CXCR4 predicts poor prognosis in patients with malignant melanoma. *Clin Cancer Res* 2005;11(5):1835-41.
16. Soltani MH, Pichardo R, Song Z, Sangha N, Camacho F, Satyamoorthy K, et al. Microtubule-associated protein 2, a marker of neuronal differentiation, induces mitotic defects, inhibits growth of melanoma cells, and predicts metastatic potential of cutaneous melanoma. *Am J Pathol* 2005;166(6):1841-50.

17. Straume O, Akslen LA. Strong expression of ID1 protein is associated with decreased survival, increased expression of ephrin-A1/EPHA2, and reduced thrombospondin-1 in malignant melanoma. *Br J Cancer* 2005;93(8):933-8.
18. Alonso SR, Ortiz P, Pollan M, Perez-Gomez B, Sanchez L, Acuna MJ, et al. Progression in cutaneous malignant melanoma is associated with distinct expression profiles: a tissue microarray-based study. *Am J Pathol* 2004;164(1):193-203.
19. Berger AJ, Camp RL, Divito KA, Kluger HM, Halaban R, Rimm DL. Automated quantitative analysis of HDM2 expression in malignant melanoma shows association with early-stage disease and improved outcome. *Cancer Res* 2004;64(23):8767-72.
20. Divito KA, Berger AJ, Camp RL, Dolled-Filhart M, Rimm DL, Kluger HM. Automated quantitative analysis of tissue microarrays reveals an association between high Bcl-2 expression and improved outcome in melanoma. *Cancer Res* 2004;64(23):8773-7.
21. Hofbauer GF, Burkhart A, Schuler G, Dummer R, Burg G, Nestle FO. High frequency of melanoma-associated antigen or HLA class I loss does not correlate with survival in primary melanoma. *J Immunother* 2004;27(1):73-8.
22. Ilmonen S, Jahkola T, Turunen JP, Muhonen T, Asko-Seljavaara S. Tenascin-C in primary malignant melanoma of the skin. *Histopathology* 2004;45(4):405-11.
23. Li Q, Murphy M, Ross J, Sheehan C, Carlson JA. Skp2 and p27kip1 expression in melanocytic nevi and melanoma: an inverse relationship. *J Cutan Pathol* 2004;31(10):633-42.
24. Berger AJ, Kluger HM, Li N, Kielhorn E, Halaban R, Ronai Z, et al. Subcellular localization of activating transcription factor 2 in melanoma specimens predicts patient survival. *Cancer Res* 2003;63(23):8103-7.
25. Korabiowska M, Tscherny M, Stachura J, Berger H, Cordon-Cardo C, Brinck U. Differential expression of DNA nonhomologous end-joining proteins Ku70 and Ku80 in melanoma progression. *Mod Pathol* 2002;15(4):426-33.
26. Thies A, Schachner M, Moll I, Berger J, Schulze HJ, Brunner G, et al. Overexpression of the cell adhesion molecule L1 is associated with metastasis in cutaneous malignant melanoma. *Eur J Cancer* 2002;38(13):1708-16.
27. Thies A, Moll I, Berger J, Wagener C, Brummer J, Schulze HJ, et al. CEACAM1 expression in cutaneous malignant melanoma predicts the development of metastatic disease. *J Clin Oncol* 2002;20(10):2530-6.
28. Florenes VA, Maelandsmo GM, Faye R, Nesland JM, Holm R. Cyclin A expression in superficial spreading malignant melanomas correlates with clinical outcome. *J Pathol* 2001;195(5):530-6.
29. Ferrier CM, Suci S, van Geloof WL, Straatman H, Eggermont AM, Koops HS, et al. High tPA-expression in primary melanoma of the limb correlates with good prognosis. *Br J Cancer* 2000;83(10):1351-9.
30. Florenes VA, Faye RS, Maelandsmo GM, Nesland JM, Holm R. Levels of cyclin D1 and D3 in malignant melanoma: deregulated cyclin D3 expression is associated with poor clinical outcome in superficial melanoma. *Clin Cancer Res* 2000;6(9):3614-20.
31. Karjalainen JM, Tammi RH, Tammi MI, Eskelinen MJ, Agren UM, Parkkinen JJ, et al. Reduced level of CD44 and hyaluronan associated with unfavorable prognosis in clinical stage I cutaneous melanoma. *Am J Pathol* 2000;157(3):957-65.
32. McDermott NC, Milburn C, Curran B, Kay EW, Barry Walsh C, Leader MB. Immunohistochemical expression of nm23 in primary invasive malignant melanoma is predictive of survival outcome. *J Pathol* 2000;190(2):157-62.
33. Straume O, Sviland L, Akslen LA. Loss of nuclear p16 protein expression correlates with increased tumor cell proliferation (Ki-67) and poor prognosis in patients with vertical growth phase melanoma. *Clin Cancer Res* 2000;6(5):1845-53.

34. Niezabitowski A, Czajewski K, Rys J, Kruczak A, Gruchala A, Wasilewska A, et al. Prognostic evaluation of cutaneous malignant melanoma: a clinicopathologic and immunohistochemical study. *J Surg Oncol* 1999;70(3):150-60.
35. Karjalainen JM, Kellokoski JK, Eskelinen MJ, Alhava EM, Kosma VM. Downregulation of transcription factor AP-2 predicts poor survival in stage I cutaneous malignant melanoma. *J Clin Oncol* 1998;16(11):3584-91.
36. Tran TA, Ross JS, Carlson JA, Mihm MC, Jr. Mitotic cyclins and cyclin-dependent kinases in melanocytic lesions. *Hum Pathol* 1998;29(10):1085-90.
37. Vaisanen A, Kallioinen M, Taskinen PJ, Turpeenniemi-Hujanen T. Prognostic value of MMP-2 immunoreactive protein (72 kD type IV collagenase) in primary skin melanoma. *J Pathol* 1998;186(1):51-8.
38. Potti A, Moazzam N, Tendulkar K, Javed NA, Koch M, Kargas S. Immunohistochemical determination of vascular endothelial growth factor (VEGF) overexpression in malignant melanoma. *Anticancer Res* 2003;23(5A):4023-6.
39. Potti A, Hille RC, Koch M. Immunohistochemical determination of HER-2/neu overexpression in malignant melanoma reveals no prognostic value, while c-Kit (CD117) overexpression exhibits potential therapeutic implications. *J Carcinog* 2003;2(1):8.
40. Weinlich G, Bitterlich W, Mayr V, Fritsch PO, Zelger B. Metallothionein-overexpression as a prognostic factor for progression and survival in melanoma. A prospective study on 520 patients. *Br J Dermatol* 2003;149(3):535-41.
41. Straume O, Akslen LA. Alterations and prognostic significance of p16 and p53 protein expression in subgroups of cutaneous melanoma. *Int J Cancer* 1997;74(5):535-9.
42. Vlaykova T, Talve L, Hahka-Kemppinen M, Hernberg M, Muhonen T, Collan Y, et al. Immunohistochemically detectable bcl-2 expression in metastatic melanoma: association with survival and treatment response. *Oncology* 2002;62(3):259-68.
43. Pearl RA, Pacifico MD, Richman PI, Stott DJ, Wilson GD, Grobbelaar AO. Ki-67 expression in melanoma. A potential method of risk assessment for the patient with a positive sentinel node. *J Exp Clin Cancer Res* 2007;26(1):109-15.
44. Mihic-Probst D, Mnich CD, Oberholzer PA, Seifert B, Sasse B, Moch H, et al. p16 expression in primary malignant melanoma is associated with prognosis and lymph node status. *Int J Cancer* 2006;118(9):2262-8.
45. Potti A, Moazzam N, Langness E, Sholes K, Tendulkar K, Koch M, et al. Immunohistochemical determination of HER-2/neu, c-Kit (CD117), and vascular endothelial growth factor (VEGF) overexpression in malignant melanoma. *J Cancer Res Clin Oncol* 2004;130(2):80-6. Epub 2003 Nov 21.
46. Giatromanolaki A, Sivridis E, Kouskoukis C, Gatter KC, Harris AL, Koukourakis MI. Hypoxia-inducible factors 1alpha and 2alpha are related to vascular endothelial growth factor expression and a poorer prognosis in nodular malignant melanomas of the skin. *Melanoma Res* 2003;13(5):493-501.
47. Maelandsmo GM, Holm R, Nesland JM, Fodstad O, Florenes VA. Reduced beta-catenin expression in the cytoplasm of advanced-stage superficial spreading malignant melanoma. *Clin Cancer Res* 2003;9(9):3383-8.
48. Mu XC, Tran TA, Ross JS, Carlson JA. Topoisomerase II-alpha expression in melanocytic nevi and malignant melanoma. *J Cutan Pathol* 2000;27(5):242-8.
49. Hieken TJ, Ronan SG, Farolan M, Shilkaitis AL, Das Gupta TK. Molecular prognostic markers in intermediate-thickness cutaneous malignant melanoma. *Cancer* 1999;85(2):375-82.
50. Karjalainen JM, Eskelinen MJ, Kellokoski JK, Reinikainen M, Alhava EM, Kosma VM. p21(WAF1/CIP1) expression in stage I cutaneous malignant melanoma: its relationship with p53, cell proliferation and survival. *Br J Cancer* 1999;79(5-6):895-902.

51. Ostmeier H, Fuchs B, Otto F, Mawick R, Lippold A, Krieg V, et al. Can immunohistochemical markers and mitotic rate improve prognostic precision in patients with primary melanoma? *Cancer* 1999;85(11):2391-9.
52. Talve LA, Collan YU, Ekfors TO. Nuclear morphometry, immunohistochemical staining with Ki-67 antibody and mitotic index in the assessment of proliferative activity and prognosis of primary malignant melanomas of the skin. *J Cutan Pathol* 1996;23(4):335-43.
53. Talve L, Kainu J, Collan Y, Ekfors T. Immunohistochemical expression of p53 protein, mitotic index and nuclear morphometry in primary malignant melanoma of the skin. *Pathol Res Pract* 1996;192(8):825-33.
54. Ramsay JA, From L, Iscoe NA, Kahn HJ. MIB-1 proliferative activity is a significant prognostic factor in primary thick cutaneous melanomas. *J Invest Dermatol* 1995;105(1):22-6.
55. McCarthy MM, Pick E, Kluger Y, Gould-Rothberg B, Lazova R, Camp RL, et al. HSP90 as a marker of progression in melanoma. *Ann Oncol* 2008;19:590-4.
56. Jorgensen K, Davidson B, Florenes VA. Activation of c-jun N-terminal kinase is associated with cell proliferation and shorter relapse-free period in superficial spreading malignant melanoma. *Mod Pathol* 2006;19(11):1446-55.
57. Lu F, Dai DL, Martinka M, Ho V, Li G. Nuclear ING2 expression is reduced in human cutaneous melanomas. *Br J Cancer* 2006;95(1):80-6. Epub 2006 Jun 6.
58. McCarthy MM, DiVito KA, Sznol M, Kovacs D, Halaban R, Berger AJ, et al. Expression of tumor necrosis factor--related apoptosis-inducing ligand receptors 1 and 2 in melanoma. *Clin Cancer Res* 2006;12(12):3856-63.
59. Sirigu P, Piras F, Minerba L, Murtas D, Maxia C, Colombari R, et al. Prognostic prediction of the immunohistochemical expression of p16 and p53 in cutaneous melanoma: a comparison of two populations from different geographical regions. *Eur J Histochem* 2006;50(3):191-8.
60. Slipicevic A, Holm R, Nguyen MT, Bohler PJ, Davidson B, Florenes VA. Expression of activated Akt and PTEN in malignant melanomas: relationship with clinical outcome. *Am J Clin Pathol* 2005;124(4):528-36.
61. Zhuang L, Lee CS, Scolyer RA, McCarthy SW, Palmer AA, Zhang XD, et al. Activation of the extracellular signal regulated kinase (ERK) pathway in human melanoma. *J Clin Pathol* 2005;58(11):1163-9.
62. Andersen K, Nesland JM, Holm R, Florenes VA, Fodstad O, Maelandsmo GM. Expression of S100A4 combined with reduced E-cadherin expression predicts patient outcome in malignant melanoma. *Mod Pathol* 2004;17(8):990-7.
63. Bachmann IM, Straume O, Akslen LA. Altered expression of cell cycle regulators Cyclin D1, p14, p16, CDK4 and Rb in nodular melanomas. *Int J Oncol* 2004;25(6):1559-65.
64. Dai DL, Martinka M, Bush JA, Li G. Reduced Apaf-1 expression in human cutaneous melanomas. *Br J Cancer* 2004;91(6):1089-95.
65. Florenes VA, Maelandsmo GM, Holm R, Reich R, Lazarovici P, Davidson B. Expression of activated TrkA protein in melanocytic tumors: relationship to cell proliferation and clinical outcome. *Am J Clin Pathol* 2004;122(3):412-20.
66. Korabiowska M, Schlott T, Siems N, Muller A, Cordon-Cardo C, Fischer G, et al. Analysis of adenomatous polyposis coli gene expression, APC locus-microsatellite instability and APC promoter methylation in the progression of melanocytic tumours. *Mod Pathol* 2004;17(12):1539-44.
67. Torlakovic EE, Bilalovic N, Nesland JM, Torlakovic G, Florenes VA. Ets-1 transcription factor is widely expressed in benign and malignant melanocytes and its expression has no significant association with prognosis. *Mod Pathol* 2004;17(11):1400-6.
68. Cruz J, Reis-Filho JS, Silva P, Lopes JM. Expression of c-met tyrosine kinase receptor is biologically and prognostically relevant for primary cutaneous malignant melanomas. *Oncology* 2003;65(1):72-82.

69. Jorgensen K, Holm R, Maeldandsmo GM, Florenes VA. Expression of activated extracellular signal-regulated kinases 1/2 in malignant melanomas: relationship with clinical outcome. *Clin Cancer Res* 2003;9(14):5325-31.
70. Korabiowska M, Cordon-Cardo C, Betke H, Schlott T, Kotthaus M, Stachura J, et al. GADD153 is an independent prognostic factor in melanoma: immunohistochemical and molecular genetic analysis. *Histol Histopathol* 2002;17(3):805-11.
71. Nikkola J, Vihinen P, Vlaykova T, Hahka-Kemppinen M, Kahari VM, Pyrhonen S. High expression levels of collagenase-1 and stromelysin-1 correlate with shorter disease-free survival in human metastatic melanoma. *Int J Cancer* 2002;97(4):432-8.
72. Straume O, Akslen LA. Importance of vascular phenotype by basic fibroblast growth factor, and influence of the angiogenic factors basic fibroblast growth factor/fibroblast growth factor receptor-1 and ephrin-A1/EphA2 on melanoma progression. *Am J Pathol* 2002;160(3):1009-19.
73. Straume O, Akslen LA. Expression of vascular endothelial growth factor, its receptors (FLT-1, KDR) and TSP-1 related to microvessel density and patient outcome in vertical growth phase melanomas. *Am J Pathol* 2001;159(1):223-35.
74. Ekmekcioglu S, Ellerhorst J, Smid CM, Prieto VG, Munsell M, Buzaid AC, et al. Inducible nitric oxide synthase and nitrotyrosine in human metastatic melanoma tumors correlate with poor survival. *Clin Cancer Res* 2000;6(12):4768-75.
75. Henrique R, Azevedo R, Bento MJ, Domingues JC, Silva C, Jeronimo C. Prognostic value of Ki-67 expression in localized cutaneous malignant melanoma. *J Am Acad Dermatol* 2000;43(6):991-1000.
76. Dai DL, Wang Y, Liu M, Martinka M, Li G. Bim Expression Is Reduced in Human Cutaneous Melanomas. *J Invest Dermatol* 2008;128:403-7.
77. Tucci MG, Lucarini G, Brancorsini D, Zizzi A, Pugnali A, Giacchetti A, et al. Involvement of E-cadherin, beta-catenin, Cdc42 and CXCR4 in the progression and prognosis of cutaneous melanoma. *Br J Dermatol* 2007;157(6):1212-6.
78. Wang Y, Dai DL, Martinka M, Li G. Prognostic significance of nuclear ING3 expression in human cutaneous melanoma. *Clin Cancer Res* 2007;13(14):4111-6.
79. Bachmann IM, Halvorsen OJ, Collett K, Stefansson IM, Straume O, Haukaas SA, et al. EZH2 expression is associated with high proliferation rate and aggressive tumor subgroups in cutaneous melanoma and cancers of the endometrium, prostate, and breast. *J Clin Oncol* 2006;24(2):268-73. Epub 2005 Dec 5.
80. Streit S, Mestel DS, Schmidt M, Ullrich A, Berking C. FGFR4 Arg388 allele correlates with tumour thickness and FGFR4 protein expression with survival of melanoma patients. *Br J Cancer* 2006;94(12):1879-86. Epub 2006 May 23.
81. Bachmann IM, Straume O, Puntervoll HE, Kalvenes MB, Akslen LA. Importance of P-cadherin, beta-catenin, and Wnt5a/frizzled for progression of melanocytic tumors and prognosis in cutaneous melanoma. *Clin Cancer Res* 2005;11(24 Pt 1):8606-14.
82. Dai DL, Martinka M, Li G. Prognostic significance of activated Akt expression in melanoma: a clinicopathologic study of 292 cases. *J Clin Oncol* 2005;23(7):1473-82.
83. Gimotty PA, Van Belle P, Elder DE, Murry T, Montone KT, Xu X, et al. Biologic and prognostic significance of dermal Ki67 expression, mitoses, and tumorigenicity in thin invasive cutaneous melanoma. *J Clin Oncol* 2005;23(31):8048-56.
84. Ilmonen S, Hernberg M, Pyrhonen S, Tarkkanen J, Asko-Seljavaara S. Ki-67, Bcl-2 and p53 expression in primary and metastatic melanoma. *Melanoma Res* 2005;15(5):375-81.
85. Ilmonen S, Vaheri A, Asko-Seljavaara S, Carpen O. Ezrin in primary cutaneous melanoma. *Mod Pathol* 2005;18(4):503-10.
86. Karst AM, Dai DL, Martinka M, Li G. PUMA expression is significantly reduced in human cutaneous melanomas. *Oncogene* 2005;24(6):1111-6.

87. Staibano S, Pepe S, Lo Muzio L, Somma P, Mascolo M, Argenziano G, et al. Poly(adenosine diphosphate-ribose) polymerase 1 expression in malignant melanomas from photoexposed areas of the head and neck region. *Hum Pathol* 2005;36(7):724-31.
88. Zhou Y, Dai DL, Martinka M, Su M, Zhang Y, Campos EI, et al. Osteopontin expression correlates with melanoma invasion. *J Invest Dermatol* 2005;124(5):1044-52.
89. Korabiowska M, Fischer G, Steinacker A, Stachura J, Cordon-Cardo C, Brinck U. Cytokeratin positivity in paraffin-embedded malignant melanomas: comparative study of KL1, A4 and Lu5 antibodies. *Anticancer Res* 2004;24(5B):3203-7.
90. Nikkola J, Vihinen P, Vlaykova T, Hahka-Kemppinen M, Heino J, Pyrhonen S. Integrin chains beta1 and alphav as prognostic factors in human metastatic melanoma. *Melanoma Res* 2004;14(1):29-37.
91. Dai DL, Makretsov N, Campos EI, Huang C, Zhou Y, Huntsman D, et al. Increased expression of integrin-linked kinase is correlated with melanoma progression and poor patient survival. *Clin Cancer Res* 2003;9(12):4409-14.
92. Kielhorn E, Provost E, Olsen D, D'Aquila TG, Smith BL, Camp RL, et al. Tissue microarray-based analysis shows phospho-beta-catenin expression in malignant melanoma is associated with poor outcome. *Int J Cancer* 2003;103(5):652-6.
93. Gutman M, Even-Sapir E, Merimsky O, Trejo L, Klausner JM, Lev-Chelouche D. The role of interleukin-8 in the initiation and progression of human cutaneous melanoma. *Anticancer Res* 2002;22(6A):3395-8.
94. Hazan C, Melzer K, Panageas KS, Li E, Kamino H, Kopf A, et al. Evaluation of the proliferation marker MIB-1 in the prognosis of cutaneous malignant melanoma. *Cancer* 2002;95(3):634-40.
95. Polsky D, Melzer K, Hazan C, Panageas KS, Busam K, Drobnjak M, et al. HDM2 protein overexpression and prognosis in primary malignant melanoma. *J Natl Cancer Inst* 2002;94(23):1803-6.
96. Korabiowska M, Ruschenburg I, Betke H, Stachura J, Schlott T, Cardo CC, et al. Downregulation of the retinoblastoma gene expression in the progression of malignant melanoma. *Pathobiology* 2001;69(5):274-80.
97. Moretti S, Spallanzani A, Chiarugi A, Fabiani M, Pinzi C. Correlation of Ki-67 expression in cutaneous primary melanoma with prognosis in a prospective study: different correlation according to thickness. *J Am Acad Dermatol* 2001;44(2):188-92.
98. Ostmeier H, Fuchs B, Otto F, Mawick R, Lippold A, Krieg V, et al. Prognostic immunohistochemical markers of primary human melanomas. *Br J Dermatol* 2001;145(2):203-9.
99. Ricaniadis N, Katakaki A, Agnantis N, Androulakis G, Karakousis CP. Long-term prognostic significance of HSP-70, c-myc and HLA-DR expression in patients with malignant melanoma. *Eur J Surg Oncol* 2001;27(1):88-93.
100. Korabiowska M, Brinck U, Dengler H, Stachura J, Schauer A, Droese M. Analysis of the DNA mismatch repair proteins expression in malignant melanomas. *Anticancer Res* 2000;20(6B):4499-505.
101. Sauroja I, Smeds J, Vlaykova T, Kumar R, Talve L, Hahka-Kemppinen M, et al. Analysis of G(1)/S checkpoint regulators in metastatic melanoma. *Genes Chromosomes Cancer* 2000;28(4):404-14.
102. van Duinen SG, Ruiter DJ, Broecker EB, van der Velde EA, Sorg C, Welvaart K, et al. Level of HLA antigens in locoregional metastases and clinical course of the disease in patients with melanoma. *Cancer Res* 1988;48(4):1019-25.
103. Fearfield LA, Larkin JM, Rowe A, A'Hern R, Fisher C, Francis N, et al. Expression of p16, CD95, CD95L and Helix pomatia agglutinin in relapsing and nonrelapsing very thin melanoma. *Br J Dermatol* 2007;156(3):440-7.

104. Bauer R, Wild PJ, Meyer S, Bataille F, Pauer A, Klinkhammer-Schalke M, et al. Prognostic relevance of P-cadherin expression in melanocytic skin tumours analysed by high-throughput tissue microarrays. *J Clin Pathol* 2006;59(7):699-705. Epub 2006 Mar 24.
105. Demirkesen C, Buyukpinarbasili N, Ramazanoglu R, Oguz O, Mandel NM, Kaner G. The correlation of angiogenesis with metastasis in primary cutaneous melanoma: a comparative analysis of microvessel density, expression of vascular endothelial growth factor and basic fibroblastic growth factor. *Pathology* 2006;38(2):132-7.
106. Fecker LF, Geilen CC, Tchernev G, Trefzer U, Assaf C, Kurbanov BM, et al. Loss of proapoptotic Bcl-2-related multidomain proteins in primary melanomas is associated with poor prognosis. *J Invest Dermatol* 2006;126(6):1366-71.
107. Ivan D, Niveiro M, Diwan AH, Eton O, Kim KB, Lacey C, et al. Analysis of protein tyrosine kinases expression in the melanoma metastases of patients treated with Imatinib Mesylate (STI571, Gleevec). *J Cutan Pathol* 2006;33(4):280-5.
108. Kashani-Sabet M, Shaikh L, Miller JR, 3rd, Nosrati M, Ferreira CM, Debs RJ, et al. NF-kappa B in the vascular progression of melanoma. *J Clin Oncol* 2004;22(4):617-23.
109. Sarris M, Scolyer RA, Konopka M, Thompson JF, Harper CG, Lee CS. Cytoplasmic expression of nm23 predicts the potential for cerebral metastasis in patients with primary cutaneous melanoma. *Melanoma Res* 2004;14(1):23-7.
110. Massi D, Franchi A, Borgognoni L, Reali UM, Santucci M. Osteonectin expression correlates with clinical outcome in thin cutaneous malignant melanomas. *Hum Pathol* 1999;30(3):339-44.
111. Otto FJ, Goldmann T, Biess B, Lippold A, Suter L, Westhoff U. Prognostic classification of malignant melanomas by combining clinical, histological, and immunohistochemical parameters. *Oncology* 1999;56(3):208-14.
112. Hernberg M, Turunen JP, von Boguslawsky K, Muhonen T, Pyrhonen S. Prognostic value of biomarkers in malignant melanoma. *Melanoma Res* 1998;8(3):283-91.
113. Sparrow LE, English DR, Taran JM, Heenan PJ. Prognostic significance of MIB-1 proliferative activity in thin melanomas and immunohistochemical analysis of MIB-1 proliferative activity in melanocytic tumors. *Am J Dermatopathol* 1998;20(1):12-6.
114. Holmes SC, MacKie RM. The value of Nm23 expression as an independent prognostic indicator in primary thick melanoma. *J Cutan Pathol* 1996;23(4):344-9.
115. Hieken TJ, Ronan SG, Farolan M, Shilkaitis AL, Kim DK, Das Gupta TK. Beta 1 integrin expression in malignant melanoma predicts occult lymph node metastases. *Surgery* 1995;118(4):669-73; discussion 673-5.
116. Reddy VB, Gattuso P, Aranha G, Carson HJ. Cell proliferation markers in predicting metastases in malignant melanoma. *J Cutan Pathol* 1995;22(3):248-51.
117. Sparrow LE, English DR, Heenan PJ, Dawkins HJ, Taran J. Prognostic significance of p53 over-expression in thin melanomas. *Melanoma Res* 1995;5(6):387-92.
118. Kernohan NM, Rankin R. S-100 protein: a prognostic indicator in cutaneous malignant melanoma? *Histopathology* 1987;11(12):1285-93.
119. Karbowniczek M, Spittle CS, Morrison T, Wu H, Henske EP. mTOR Is Activated in the Majority of Malignant Melanomas. *J Invest Dermatol* 2008;128:980-7.
120. Batinac T, Hadzisejdic I, Brumini G, Ruzic A, Vojnikovic B, Zamolo G. Expression of cell cycle and apoptosis regulatory proteins and telomerase in melanocytic lesions. *Coll Antropol* 2007;31 Suppl 1:17-22.
121. Bertucci F, Pages C, Finetti P, Rochaix P, Lamant L, Devilard E, et al. Gene expression profiling of human melanoma cell lines with distinct metastatic potential identifies new progression markers. *Anticancer Res* 2007;27(5A):3441-9.

122. Chwirot BW, Kuzbicki L. Cyclooxygenase-2 (COX-2): first immunohistochemical marker distinguishing early cutaneous melanomas from benign melanocytic skin tumours. *Melanoma Res* 2007;17(3):139-45.
123. Demirkan NC, Kesen Z, Akdag B, Larue L, Delmas V. The effect of the sun on expression of beta-catenin, p16 and cyclin d1 proteins in melanocytic lesions. *Clin Exp Dermatol* 2007;32(6):733-9.
124. Denicourt C, Saenz CC, Datnow B, Cui XS, Dowdy SF. Relocalized p27Kip1 tumor suppressor functions as a cytoplasmic metastatic oncogene in melanoma. *Cancer Res* 2007;67(19):9238-43.
125. Denk AE, Bettstetter M, Wild PJ, Hoek K, Bataille F, Dietmaier W, et al. Loss of maspin expression contributes to a more invasive potential in malignant melanoma. *Pigment Cell Res* 2007;20(2):112-9.
126. Einspahr JG, Thomas TL, Saboda K, Nickolof BJ, Warneke J, Curiel-Lewandrowski C, et al. Expression of vascular endothelial growth factor in early cutaneous melanocytic lesion progression. *Cancer* 2007;110(11):2519-27.
127. Ferrari D, Lombardi M, Ricci R, Michiara M, Santini M, De Panfilis G. Dermatopathological indicators of poor melanoma prognosis are significantly inversely correlated with the expression of NM23 protein in primary cutaneous melanoma. *J Cutan Pathol* 2007;34(9):705-12.
128. Giehl KA, Nagele U, Volkenandt M, Berking C. Protein expression of melanocyte growth factors (bFGF, SCF) and their receptors (FGFR-1, c-kit) in nevi and melanoma. *J Cutan Pathol* 2007;34(1):7-14.
129. Gilaberte Y, Vera J, Coscojuela C, Roca MJ, Parrado C, Gonzalez S. [Expression of galanin in melanocytic tumors]. *Actas Dermosifiliogr* 2007;98(1):24-34.
130. Klein WM, Wu BP, Zhao S, Wu H, Klein-Szanto AJ, Tahan SR. Increased expression of stem cell markers in malignant melanoma. *Mod Pathol* 2007;20(1):102-7.
131. Lebe B, Pabuccuoglu U, Ozer E. The significance of Ki-67 proliferative index and cyclin D1 expression of dysplastic nevi in the biologic spectrum of melanocytic lesions. *Appl Immunohistochem Mol Morphol* 2007;15(2):160-4.
132. Leotlela PD, Wade MS, Duray PH, Rhode MJ, Brown HF, Rosenthal DT, et al. Claudin-1 overexpression in melanoma is regulated by PKC and contributes to melanoma cell motility. *Oncogene* 2007;26(26):3846-56.
133. McHugh JB, Fullen DR, Ma L, Klee CG, Su LD. Expression of polycomb group protein EZH2 in nevi and melanoma. *J Cutan Pathol* 2007;34(8):597-600.
134. Neto DS, Pantaleao L, de Sa BC, Landman G. Alpha-v-beta3 integrin expression in melanocytic nevi and cutaneous melanoma. *J Cutan Pathol* 2007;34(11):851-6.
135. Pecina-Slaus N, Zigmund M, Kusec V, Martic TN, Cacic M, Slaus M. E-cadherin and beta-catenin expression patterns in malignant melanoma assessed by image analysis. *J Cutan Pathol* 2007;34(3):239-46.
136. Pisacane AM, Picciotto F, Risio M. CD31 and CD34 expression as immunohistochemical markers of endothelial transdifferentiation in human cutaneous melanoma. *Cell Oncol* 2007;29(1):59-66.
137. Polak ME, Borthwick NJ, Gabriel FG, Johnson P, Higgins B, Hurren J, et al. Mechanisms of local immunosuppression in cutaneous melanoma. *Br J Cancer* 2007;96(12):1879-87.
138. Pritchard-Jones RO, Dunn DB, Qiu Y, Varey AH, Orlando A, Rigby H, et al. Expression of VEGF(xxx)b, the inhibitory isoforms of VEGF, in malignant melanoma. *Br J Cancer* 2007;97(2):223-30.
139. Puri N, Ahmed S, Janamanchi V, Tretiakova M, Zumba O, Krausz T, et al. c-Met is a potentially new therapeutic target for treatment of human melanoma. *Clin Cancer Res* 2007;13(7):2246-53.

140. Rakosy Z, Vizkeleti L, Ecsedi S, Voko Z, Begany A, Barok M, et al. EGFR gene copy number alterations in primary cutaneous malignant melanomas are associated with poor prognosis. *Int J Cancer* 2007;121(8):1729-37.
141. Rothhammer T, Wild PJ, Meyer S, Bataille F, Pauer A, Klinkhammer-Schalke M, et al. Bone morphogenetic protein 7 (BMP7) expression is a potential novel prognostic marker for recurrence in patients with primary melanoma. *Cancer Biomark* 2007;3(2):111-7.
142. Sanki A, Li W, Colman M, Karim RZ, Thompson JF, Scolyer RA. Reduced expression of p16 and p27 is correlated with tumour progression in cutaneous melanoma. *Pathology* 2007;39(6):551-7.
143. Seidl H, Richtig E, Tilz H, Stefan M, Schmidbauer U, Asslaber M, et al. Profiles of chemokine receptors in melanocytic lesions: de novo expression of CXCR6 in melanoma. *Hum Pathol* 2007;38(5):768-80.
144. Singh RS, Diwan AH, Zhang PS, Prieto VG. Phosphoinositide 3-kinase is not overexpressed in melanocytic lesions. *J Cutan Pathol* 2007;34(3):220-5.
145. Thies A, Berlin A, Brunner G, Schulze HJ, Moll I, Pfuller U, et al. Glycoconjugate profiling of primary melanoma and its sentinel node and distant metastases: implications for diagnosis and pathophysiology of metastases. *Cancer Lett* 2007;248(1):68-80.
146. Weishaupt C, Munoz KN, Buzney E, Kupper TS, Fuhlbrigge RC. T-cell distribution and adhesion receptor expression in metastatic melanoma. *Clin Cancer Res* 2007;13(9):2549-56.
147. Wilsher M, Cheerla B. WT1 as a complementary marker of malignant melanoma: an immunohistochemical study of whole sections. *Histopathology* 2007;51(5):605-10.
148. Zygouris P, Tsiambas E, Tiniakos D, Karameris A, Athanassiou AE, Kittas C, et al. Evaluation of combined h-TERT, bcl-2, and caspases 3 and 8 expression in cutaneous malignant melanoma based on tissue microarrays and computerized image analysis. *J Buon* 2007;12(4):513-9.
149. Arndt S, Bosserhoff AK. TANGO is a tumor suppressor of malignant melanoma. *Int J Cancer* 2006;119(12):2812-20.
150. Barrow C, Browning J, MacGregor D, Davis ID, Sturrock S, Jungbluth AA, et al. Tumor antigen expression in melanoma varies according to antigen and stage. *Clin Cancer Res* 2006;12(3 Pt 1):764-71.
151. Ding Y, Prieto VG, Zhang PS, Rosenthal S, Smith KJ, Skelton HG, et al. Nuclear expression of the antiapoptotic protein survivin in malignant melanoma. *Cancer* 2006;106(5):1123-9.
152. Honig A, Rieger L, Kapp M, Krockenberger M, Eck M, Dietl J, et al. Increased tartrate-resistant acid phosphatase (TRAP) expression in malignant breast, ovarian and melanoma tissue: an investigational study. *BMC Cancer* 2006;6(199):199.
153. Kaariainen E, Nummela P, Soikkeli J, Yin M, Lukk M, Jahkola T, et al. Switch to an invasive growth phase in melanoma is associated with tenascin-C, fibronectin, and procollagen-I forming specific channel structures for invasion. *J Pathol* 2006;210(2):181-91.
154. Kalogeraki A, Garbagnati F, Darivianaki K, Delides GS, Santinami M, Stathopoulos EN, et al. HSP-70, C-myc and HLA-DR expression in patients with cutaneous malignant melanoma metastatic in lymph nodes. *Anticancer Res* 2006;26(5A):3551-4.
155. Kuphal S, Wallner S, Schimanski CC, Bataille F, Hofer P, Strand S, et al. Expression of Hvgl-1 is strongly reduced in malignant melanoma. *Oncogene* 2006;25(1):103-10.
156. Kuphal S, Lodermeier S, Bataille F, Schuierer M, Hoang BH, Bosserhoff AK. Expression of Dickkopf genes is strongly reduced in malignant melanoma. *Oncogene* 2006;25(36):5027-36. *Epub* 2006 Mar 27.
157. Kuzbicki L, Gajo B, Chwirot BW. Different expression of lysosome-associated membrane protein-1 in human melanomas and benign melanocytic lesions. *Melanoma Res* 2006;16(3):235-43.
158. Kuzbicki L, Sarnecka A, Chwirot BW. Expression of cyclooxygenase-2 in benign naevi and during human cutaneous melanoma progression. *Melanoma Res* 2006;16(1):29-36.

159. Kuzbicki L, Aladowicz E, Chwirot BW. Cyclin-dependent kinase 2 expression in human melanomas and benign melanocytic skin lesions. *Melanoma Res* 2006;16(5):435-44.
160. Massi D, Tarantini F, Franchi A, Paglierani M, Di Serio C, Pellerito S, et al. Evidence for differential expression of Notch receptors and their ligands in melanocytic nevi and cutaneous malignant melanoma. *Mod Pathol* 2006;19(2):246-54.
161. Miracco C, De Nisi MC, Arcuri F, Cosci E, Pacenti L, Toscano M, et al. Macrophage migration inhibitory factor protein and mRNA expression in cutaneous melanocytic tumours. *Int J Oncol* 2006;28(2):345-52.
162. Mirmohammadsadegh A, Hassan M, Bardenheuer W, Marini A, Gustrau A, Nambiar S, et al. STAT5 phosphorylation in malignant melanoma is important for survival and is mediated through SRC and JAK1 kinases. *J Invest Dermatol* 2006;126(10):2272-80. Epub 2006 Jun 1.
163. Niedojadlo K, Labeledzka K, Lada E, Milewska A, Chwirot BW. Apaf-1 expression in human cutaneous melanoma progression and in pigmented nevi. *Pigment Cell Res* 2006;19(1):43-50.
164. Packer L, Pavey S, Parker A, Stark M, Johansson P, Clarke B, et al. Osteopontin is a downstream effector of the PI3-kinase pathway in melanomas that is inversely correlated with functional PTEN. *Carcinogenesis* 2006;27(9):1778-86.
165. Prieto VG, Mourad-Zeidan AA, Melnikova V, Johnson MM, Lopez A, Diwan AH, et al. Galectin-3 expression is associated with tumor progression and pattern of sun exposure in melanoma. *Clin Cancer Res* 2006;12(22):6709-15.
166. Scala S, Giuliano P, Ascierto PA, Ierano C, Franco R, Napolitano M, et al. Human melanoma metastases express functional CXCR4. *Clin Cancer Res* 2006;12(8):2427-33.
167. Schmidt AN, Nanney LB, Boyd AS, King LE, Jr., Ellis DL. Oestrogen receptor-beta expression in melanocytic lesions. *Exp Dermatol* 2006;15(12):971-80.
168. Shannan B, Seifert M, Leskov K, Boothman D, Pfohler C, Tilgen W, et al. Clusterin (CLU) and melanoma growth: CLU is expressed in malignant melanoma and 1,25-dihydroxyvitamin D3 modulates expression of CLU in melanoma cell lines in vitro. *Anticancer Res* 2006;26(4A):2707-16.
169. Simonetti O, Goteri G, Lucarini G, Filosa A, Pieramici T, Rubini C, et al. Potential role of CCL27 and CCR10 expression in melanoma progression and immune escape. *Eur J Cancer* 2006;42(8):1181-7. Epub 2006 Apr 27.
170. Topczewska JM, Postovit LM, Margaryan NV, Sam A, Hess AR, Wheaton WW, et al. Embryonic and tumorigenic pathways converge via Nodal signaling: role in melanoma aggressiveness. *Nat Med* 2006;12(8):925-32. Epub 2006 Jul 30.
171. Varney ML, Johansson SL, Singh RK. Distinct expression of CXCL8 and its receptors CXCR1 and CXCR2 and their association with vessel density and aggressiveness in malignant melanoma. *Am J Clin Pathol* 2006;125(2):209-16.
172. Vereecken P, Reynaert S, Lalmand MC, Zouaoui-Boudjeltia K, Heenen M, Van Den Heule B, et al. Decreased immunoreactive maspin expression in intermediate thickness and thick primary melanoma lesions. *J Int Med Res* 2006;34(1):52-7.
173. Winnepeninckx V, Debiec-Rychter M, Belien JA, Fiten P, Michiels S, Lazar V, et al. Expression and possible role of hPTTG1/securin in cutaneous malignant melanoma. *Mod Pathol* 2006;19(9):1170-80. Epub 2006 Jun 23.
174. Xi Y, Nakajima G, Hamil T, Fodstad O, Riker A, Ju J. Association of insulin-like growth factor binding protein-3 expression with melanoma progression. *Mol Cancer Ther* 2006;5(12):3078-84.
175. Zhang H, Rosdahl I. Bcl-xL and bcl-2 proteins in melanoma progression and UVB-induced apoptosis. *Int J Oncol* 2006;28(3):661-6.
176. Zubieta MR, Furman D, Barrio M, Bravo AI, Domenichini E, Mordoh J. Galectin-3 expression correlates with apoptosis of tumor-associated lymphocytes in human melanoma biopsies. *Am J Pathol* 2006;168(5):1666-75.

177. Al-Batran SE, Rafiyan MR, Atmaca A, Neumann A, Karbach J, Bender A, et al. Intratumoral T-cell infiltrates and MHC class I expression in patients with stage IV melanoma. *Cancer Res* 2005;65(9):3937-41.
178. Baldi A, Lombardi D, Russo P, Palescandolo E, De Luca A, Santini D, et al. Ferritin contributes to melanoma progression by modulating cell growth and sensitivity to oxidative stress. *Clin Cancer Res* 2005;11(9):3175-83.
179. Brychtova S, Fiuraskova M, Brychta T, Hirnak J. [The role of intermedial filament nestin in malignant melanoma progression]. *Cesk Patol* 2005;41(4):143-5.
180. Busam KJ, Kucukgol D, Sato E, Frosina D, Teruya-Feldstein J, Jungbluth AA. Immunohistochemical analysis of novel monoclonal antibody PNL2 and comparison with other melanocyte differentiation markers. *Am J Surg Pathol* 2005;29(3):400-6.
181. Cohn ML, Goncharuk VN, Diwan AH, Zhang PS, Shen SS, Prieto VG. Loss of claudin-1 expression in tumor-associated vessels correlates with acquisition of metastatic phenotype in melanocytic neoplasms. *J Cutan Pathol* 2005;32(8):533-6.
182. Ehrmann J, Kolar Z, Mokry J. Nestin as a diagnostic and prognostic marker: immunohistochemical analysis of its expression in different tumours. *J Clin Pathol* 2005;58(2):222-3.
183. Fiuraskova M, Brychtova S, Sedlakova E, Benes P, Zalesak B, Hlobilkova A, et al. Molecular changes in PDEGF and bFGF in malignant melanomas in relation to the stromal microenvironment. *Anticancer Res* 2005;25(6B):4299-303.
184. Hess AR, Postovit LM, Margaryan NV, Seftor EA, Schneider GB, Seftor RE, et al. Focal adhesion kinase promotes the aggressive melanoma phenotype. *Cancer Res* 2005;65(21):9851-60.
185. Kuivanen T, Ahokas K, Virolainen S, Jahkola T, Holtta E, Saksela O, et al. MMP-21 is upregulated at early stages of melanoma progression but disappears with more aggressive phenotype. *Virchows Arch* 2005;447(6):954-60. Epub 2005 Aug 20.
186. Kumar SM, Acs G, Fang D, Herlyn M, Elder DE, Xu X. Functional erythropoietin autocrine loop in melanoma. *Am J Pathol* 2005;166(3):823-30.
187. Longo-Imedio MI, Longo N, Trevino I, Lazaro P, Sanchez-Mateos P. Clinical significance of CXCR3 and CXCR4 expression in primary melanoma. *Int J Cancer* 2005;117(5):861-5.
188. Massi D, Naldini A, Ardinghi C, Carraro F, Franchi A, Paglierani M, et al. Expression of protease-activated receptors 1 and 2 in melanocytic nevi and malignant melanoma. *Hum Pathol* 2005;36(6):676-85.
189. Murry BP, Greiter-Wilke A, Paulsen DP, Hiatt KM, Beltrami CA, Marchetti D. Selective heparanase localization in malignant melanoma. *Int J Oncol* 2005;26(2):345-52.
190. Pisacane AM, Risio M. VEGF and VEGFR-2 immunohistochemistry in human melanocytic naevi and cutaneous melanomas. *Melanoma Res* 2005;15(1):39-43.
191. Quatresooz P, Pierard GE. Immunohistochemical investigation of alpha1 (IV) and alpha5 (IV) collagen chains in a broad spectrum of melanocytic tumours. *Melanoma Res* 2005;15(3):161-8.
192. Ramirez JA, Guitart J, Rao MS, Diaz LK. Cyclin D1 expression in melanocytic lesions of the skin. *Ann Diagn Pathol* 2005;9(4):185-8.
193. Redondo P, Lloret P, Idoate M, Inoges S. Expression and serum levels of MMP-2 and MMP-9 during human melanoma progression. *Clin Exp Dermatol* 2005;30(5):541-5.
194. Roesch A, Becker B, Meyer S, Wild P, Hafner C, Landthaler M, et al. Retinoblastoma-binding protein 2-homolog 1: a retinoblastoma-binding protein downregulated in malignant melanomas. *Mod Pathol* 2005;18(9):1249-57.
195. Rothhammer T, Poser I, Soncin F, Bataille F, Moser M, Bosserhoff AK. Bone morphogenic proteins are overexpressed in malignant melanoma and promote cell invasion and migration. *Cancer Res* 2005;65(2):448-56.

196. Sedghizadeh PP, Williams JD, Allen CM, Prasad ML. MSG-1 expression in benign and malignant melanocytic lesions of cutaneous and mucosal epithelium. *Med Sci Monit* 2005;11(7):BR189-94.
197. Varney ML, Johansson SL, Singh RK. Tumour-associated macrophage infiltration, neovascularization and aggressiveness in malignant melanoma: role of monocyte chemoattractant protein-1 and vascular endothelial growth factor-A. *Melanoma Res* 2005;15(5):417-25.
198. Vereecken P, Debray C, Petein M, Awada A, Lalmand MC, Laporte M, et al. Expression of galectin-3 in primary and metastatic melanoma: immunohistochemical studies on human lesions and nude mice xenograft tumors. *Arch Dermatol Res* 2005;296(8):353-8. Epub 2005 Jan 11.
199. Vetter CS, Muller-Blech K, Schrama D, Brocker EB, Becker JC. Cytoplasmic and nuclear expression of survivin in melanocytic skin lesions. *Arch Dermatol Res* 2005;297(1):26-30. Epub 2005 May 19.
200. Woenckhaus C, Maile S, Uffmann S, Bansemir M, Dittberner T, Poetsch M, et al. Expression of Skp2 and p27KIP1 in naevi and malignant melanoma of the skin and its relation to clinical outcome. *Histol Histopathol* 2005;20(2):501-8.
201. Zhang H. Survivin protein in UVB induced apoptosis of melanoma cells and in melanoma progression. *Oncol Rep* 2005;13(6):1121-6.
202. Baldi A, Santini D, Russo P, Catricala C, Amantea A, Picardo M, et al. Analysis of APAF-1 expression in human cutaneous melanoma progression. *Exp Dermatol* 2004;13(2):93-7.
203. Becker B, Multhoff G, Farkas B, Wild PJ, Landthaler M, Stolz W, et al. Induction of Hsp90 protein expression in malignant melanomas and melanoma metastases. *Exp Dermatol* 2004;13(1):27-32.
204. Bilalovic N, Sandstad B, Golouh R, Nesland JM, Selak I, Torlakovic EE. CD10 protein expression in tumor and stromal cells of malignant melanoma is associated with tumor progression. *Mod Pathol* 2004;17(10):1251-8.
205. Dissemond J, Busch M, Kothen T, Mors J, Weimann TK, Lindeke A, et al. Differential downregulation of endoplasmic reticulum-residing chaperones calnexin and calreticulin in human metastatic melanoma. *Cancer Lett* 2004;203(2):225-31.
206. Ellerhorst JA, Naderi AA, Johnson MK, Pelletier P, Prieto VG, Diwan AH, et al. Expression of thyrotropin-releasing hormone by human melanoma and nevi. *Clin Cancer Res* 2004;10(16):5531-6.
207. Hazarika P, McCarty MF, Prieto VG, George S, Babu D, Koul D, et al. Up-regulation of Flotillin-2 is associated with melanoma progression and modulates expression of the thrombin receptor protease activated receptor 1. *Cancer Res* 2004;64(20):7361-9.
208. Ivan D, Diwan AH, Esteva FJ, Prieto VG. Expression of cell cycle inhibitor p27Kip1 and its inactivator Jab1 in melanocytic lesions. *Mod Pathol* 2004;17(7):811-8.
209. Kang SH, Fung MA, Gandour-Edwards R, Reilly D, Dizon T, Grahn J, et al. Heat shock protein 27 is expressed in normal and malignant human melanocytes in vivo. *J Cutan Pathol* 2004;31(10):665-71.
210. Kluger HM, DiVito K, Berger AJ, Halaban R, Ariyan S, Camp RL, et al. Her2/neu is not a commonly expressed therapeutic target in melanoma -- a large cohort tissue microarray study. *Melanoma Res* 2004;14(3):207-10.
211. Krenkel S, Groteluschen F, Bartsch S, Tronnier M. Cadherin expression pattern in melanocytic tumors more likely depends on the melanocyte environment than on tumor cell progression. *J Cutan Pathol* 2004;31(1):1-7.
212. Li Z, Metze D, Nashan D, Muller-Tidow C, Serve HL, Poremba C, et al. Expression of SOCS-1, suppressor of cytokine signalling-1, in human melanoma. *J Invest Dermatol* 2004;123(4):737-45.

213. McNulty SE, del Rosario R, Cen D, Meyskens FL, Jr., Yang S. Comparative expression of NFkappaB proteins in melanocytes of normal skin vs. benign intradermal naevus and human metastatic melanoma biopsies. *Pigment Cell Res* 2004;17(2):173-80.
214. Ng KC, Campos EI, Martinka M, Li G. XAF1 expression is significantly reduced in human melanoma. *J Invest Dermatol* 2004;123(6):1127-34.
215. Poyraz A, Akyurek N, Gonul, II, Erdem O. P21 and Bax expression in cutaneous malignant melanomas: correlation with histologic prognostic parameters. *J Exp Clin Cancer Res* 2004;23(4):625-31.
216. Schuierer MM, Bataille F, Hagan S, Kolch W, Bosserhoff AK. Reduction in Raf kinase inhibitor protein expression is associated with increased Ras-extracellular signal-regulated kinase signaling in melanoma cell lines. *Cancer Res* 2004;64(15):5186-92.
217. Stefanou D, Batistatou A, Zioga A, Arkoumani E, Papachristou DJ, Agnantis NJ. Immunohistochemical expression of vascular endothelial growth factor (VEGF) and C-KIT in cutaneous melanocytic lesions. *Int J Surg Pathol* 2004;12(2):133-8.
218. Weeraratna AT, Becker D, Carr KM, Duray PH, Rosenblatt KP, Yang S, et al. Generation and analysis of melanoma SAGE libraries: SAGE advice on the melanoma transcriptome. *Oncogene* 2004;23(12):2264-74.
219. Woenckhaus C, Fenic I, Giebel J, Hauser S, Failing K, Woenckhaus J, et al. Loss of heterozygosity at 12p13 and loss of p27KIP1 protein expression contribute to melanoma progression. *Virchows Arch* 2004;445(5):491-7.
220. Banfalvi T, Udvarhelyi N, Orosz Z, Gergye M, Gilde K, Timar J. Heterogenous S-100B protein expression patterns in malignant melanoma and association with serum protein levels. *Oncology* 2003;64(4):374-9.
221. Behrmann I, Wallner S, Komyod W, Heinrich PC, Schuierer M, Buettner R, et al. Characterization of methylthioadenosin phosphorylase (MTAP) expression in malignant melanoma. *Am J Pathol* 2003;163(2):683-90.
222. Bernard K, Litman E, Fitzpatrick JL, Shellman YG, Argast G, Polvinen K, et al. Functional proteomic analysis of melanoma progression. *Cancer Res* 2003;63(20):6716-25.
223. Dissemmond J, Kothen T, Mors J, Weimann TK, Lindeke A, Goos M, et al. Downregulation of tapasin expression in progressive human malignant melanoma. *Arch Dermatol Res* 2003;295(2):43-9.
224. Ekmekcioglu S, Ellerhorst JA, Mumm JB, Zheng M, Broemeling L, Prieto VG, et al. Negative association of melanoma differentiation-associated gene (mda-7) and inducible nitric oxide synthase (iNOS) in human melanoma: MDA-7 regulates iNOS expression in melanoma cells. *Mol Cancer Ther* 2003;2(1):9-17.
225. Fogel M, Mechttersheimer S, Huszar M, Smirnov A, Abu-Dahi A, Tilgen W, et al. L1 adhesion molecule (CD 171) in development and progression of human malignant melanoma. *Cancer Lett* 2003;189(2):237-47.
226. Goulet AC, Einsphar JG, Alberts DS, Beas A, Burk C, Bhattacharyya A, et al. Analysis of cyclooxygenase 2 (COX-2) expression during malignant melanoma progression. *Cancer Biol Ther* 2003;2(6):713-8.
227. Hafner C, Bataille F, Meyer S, Becker B, Roesch A, Landthaler M, et al. Loss of EphB6 expression in metastatic melanoma. *Int J Oncol* 2003;23(6):1553-9.
228. Haritopoulos KN, Lazaris AC, Kavantzias N, Tseleni-Balafouta S, Thomopoulou G, Aroni K. ICAM-1 and beta(3) integrin immunoexpression in malignant melanoma cells: can they be used as additional predictors? *APMIS* 2003;111(3):421-9.
229. Keehn CA, Smoller BR, Morgan MB. Expression of the ets-1 proto-oncogene in melanocytic lesions. *Mod Pathol* 2003;16(8):772-7.

230. Miranda E, Vizoso F, Martin A, Quintela I, Corte MD, Segui ME, et al. Apolipoprotein D expression in cutaneous malignant melanoma. *J Surg Oncol* 2003;83(2):99-105.
231. Potti A, Hille R, Koch M. Immunohistochemical determination of HER-2/neu in malignant melanoma. *Anticancer Res* 2003;23(5A):4067-9.
232. Redondo P, Sanchez-Carpintero I, Bauza A, Idoate M, Solano T, Mihm MC, Jr. Immunologic escape and angiogenesis in human malignant melanoma. *J Am Acad Dermatol* 2003;49(2):255-63.
233. Ribatti D, Vacca A, Ria R, Marzullo A, Nico B, Filotico R, et al. Neovascularisation, expression of fibroblast growth factor-2, and mast cells with tryptase activity increase simultaneously with pathological progression in human malignant melanoma. *Eur J Cancer* 2003;39(5):666-74.
234. Rosenwald IB, Wang S, Savas L, Woda B, Pullman J. Expression of translation initiation factor eIF-2alpha is increased in benign and malignant melanocytic and colonic epithelial neoplasms. *Cancer* 2003;98(5):1080-8.
235. Sander CS, Hamm F, Elsner P, Thiele JJ. Oxidative stress in malignant melanoma and non-melanoma skin cancer. *Br J Dermatol* 2003;148(5):913-22.
236. Shen SS, Zhang PS, Eton O, Prieto VG. Analysis of protein tyrosine kinase expression in melanocytic lesions by tissue array. *J Cutan Pathol* 2003;30(9):539-47.
237. Slater M, Scolyer RA, Gidley-Baird A, Thompson JF, Barden JA. Increased expression of apoptotic markers in melanoma. *Melanoma Res* 2003;13(2):137-45.
238. Sundram U, Harvell JD, Rouse RV, Natkunam Y. Expression of the B-cell proliferation marker MUM1 by melanocytic lesions and comparison with S100, gp100 (HMB45), and MelanA. *Mod Pathol* 2003;16(8):802-10.
239. Wang H, Shen SS, Wang H, Diwan AH, Zhang W, Fuller GN, et al. Expression of insulin-like growth factor-binding protein 2 in melanocytic lesions. *J Cutan Pathol* 2003;30(10):599-605.
240. Xu X, Tahan SR, Pasha TL, Zhang PJ. Expression of neurotrophin receptor Trk-C in nevi and melanomas. *J Cutan Pathol* 2003;30(5):318-22.
241. Baldi A, De Luca A, Morini M, Battista T, Felsani A, Baldi F, et al. The HtrA1 serine protease is down-regulated during human melanoma progression and represses growth of metastatic melanoma cells. *Oncogene* 2002;21(43):6684-8.
242. Demunter A, Libbrecht L, Degreef H, De Wolf-Peeters C, van den Oord JJ. Loss of membranous expression of beta-catenin is associated with tumor progression in cutaneous melanoma and rarely caused by exon 3 mutations. *Mod Pathol* 2002;15(4):454-61.
243. Dhawan P, Singh AB, Ellis DL, Richmond A. Constitutive activation of Akt/protein kinase B in melanoma leads to up-regulation of nuclear factor-kappaB and tumor progression. *Cancer Res* 2002;62(24):7335-42.
244. Dobrowolski R, Hein R, Buettner R, Bosserhoff AK. Loss of p14ARF expression in melanoma. *Arch Dermatol Res* 2002;293(11):545-51.
245. Ellerhorst JA, Prieto VG, Ekmekcioglu S, Broemeling L, Yekell S, Chada S, et al. Loss of MDA-7 expression with progression of melanoma. *J Clin Oncol* 2002;20(4):1069-74.
246. Goncharuk VN, Ross JS, Carlson JA. Actin-binding protein fascin expression in skin neoplasia. *J Cutan Pathol* 2002;29(7):430-8.
247. Kanitakis J, Narvaez D, Claudy A. Differential expression of the CD10 antigen (neutral endopeptidase) in primary versus metastatic malignant melanomas of the skin. *Melanoma Res* 2002;12(3):241-4.
248. Kim SH, Gunnery S, Choe JK, Mathews MB. Neoplastic progression in melanoma and colon cancer is associated with increased expression and activity of the interferon-inducible protein kinase, PKR. *Oncogene* 2002;21(57):8741-8.

249. Kneisel L, Strebhardt K, Bernd A, Wolter M, Binder A, Kaufmann R. Expression of polo-like kinase (PLK1) in thin melanomas: a novel marker of metastatic disease. *J Cutan Pathol* 2002;29(6):354-8.
250. Kurschat P, Wickenhauser C, Groth W, Krieg T, Mauch C. Identification of activated matrix metalloproteinase-2 (MMP-2) as the main gelatinolytic enzyme in malignant melanoma by in situ zymography. *J Pathol* 2002;197(2):179-87.
251. Nouman GS, Anderson JJ, Mathers ME, Leonard N, Crosier S, Lunec J, et al. Nuclear to cytoplasmic compartment shift of the p33ING1b tumour suppressor protein is associated with malignancy in melanocytic lesions. *Histopathology* 2002;40(4):360-6.
252. Pavey SJ, Cummings MC, Whiteman DC, Castellano M, Walsh MD, Gabrielli BG, et al. Loss of p16 expression is associated with histological features of melanoma invasion. *Melanoma Res* 2002;12(6):539-47.
253. Redondo P, Solano T, B VA, Bauza A, Idoate M. Fas and Fas ligand: expression and soluble circulating levels in cutaneous malignant melanoma. *Br J Dermatol* 2002;147(1):80-6.
254. Simonetti O, Lucarini G, Brancorsini D, Nita P, Bernardini ML, Biagini G, et al. Immunohistochemical expression of vascular endothelial growth factor, matrix metalloproteinase 2, and matrix metalloproteinase 9 in cutaneous melanocytic lesions. *Cancer* 2002;95(9):1963-70.
255. Timar J, Raso E, Dome B, Ladanyi A, Banfalvi T, Gilde K, et al. Expression and function of the AMF receptor by human melanoma in experimental and clinical systems. *Clin Exp Metastasis* 2002;19(3):225-32.
256. Touab M, Villena J, Barranco C, Arumi-Uria M, Bassols A. Versican is differentially expressed in human melanoma and may play a role in tumor development. *Am J Pathol* 2002;160(2):549-57.
257. Winer I, Normolle DP, Shureiqi I, Sondak VK, Johnson T, Su L, et al. Expression of 12-lipoxygenase as a biomarker for melanoma carcinogenesis. *Melanoma Res* 2002;12(5):429-34.
258. Ahrens T, Assmann V, Fieber C, Termeer C, Herrlich P, Hofmann M, et al. CD44 is the principal mediator of hyaluronic-acid-induced melanoma cell proliferation. *J Invest Dermatol* 2001;116(1):93-101.
259. Baldi A, Santini D, Battista T, Dragonetti E, Ferranti G, Petitti T, et al. Expression of AP-2 transcription factor and of its downstream target genes c-kit, E-cadherin and p21 in human cutaneous melanoma. *J Cell Biochem* 2001;83(3):364-72.
260. Bodey B, Bodey B, Jr., Siegel SE, Kaiser HE. Matrix metalloproteinase expression in malignant melanomas: tumor-extracellular matrix interactions in invasion and metastasis. *In Vivo* 2001;15(1):57-64.
261. de Vries TJ, Smeets M, de Graaf R, Hou-Jensen K, Brocker EB, Renard N, et al. Expression of gp100, MART-1, tyrosinase, and S100 in paraffin-embedded primary melanomas and locoregional, lymph node, and visceral metastases: implications for diagnosis and immunotherapy. A study conducted by the EORTC Melanoma Cooperative Group. *J Pathol* 2001;193(1):13-20.
262. Demunter A, De Wolf-Peeters C, Degreef H, Stas M, van den Oord JJ. Expression of the endothelin-B receptor in pigment cell lesions of the skin. Evidence for its role as tumor progression marker in malignant melanoma. *Virchows Arch* 2001;438(5):485-91.
263. Denkert C, Kobel M, Berger S, Siegert A, Leclere A, Trefzer U, et al. Expression of cyclooxygenase 2 in human malignant melanoma. *Cancer Res* 2001;61(1):303-8.
264. Fang D, Hallman J, Sangha N, Kute TE, Hammarback JA, White WL, et al. Expression of microtubule-associated protein 2 in benign and malignant melanocytes: implications for differentiation and progression of cutaneous melanoma. *Am J Pathol* 2001;158(6):2107-15.
265. Fink-Puches R, Pilarski P, Schmidbauer U, Kerl H, Soyer HP. No evidence for c-erbB-2 overexpression in cutaneous melanoma. *Anticancer Res* 2001;21(4A):2793-5.

266. Frahm SO, Schubert C, Parwaresch R, Rudolph P. High proliferative activity may predict early metastasis of thin melanomas. *Hum Pathol* 2001;32(12):1376-81.
267. Georgieva J, Sinha P, Schadendorf D. Expression of cyclins and cyclin dependent kinases in human benign and malignant melanocytic lesions. *J Clin Pathol* 2001;54(3):229-35.
268. Gilhooly EM, Morse-Gaudio M, Bianchi L, Reinhart L, Rose DP, Connolly JM, et al. Loss of expression of protein kinase C beta is a common phenomenon in human malignant melanoma: a result of transformation or differentiation? *Melanoma Res* 2001;11(4):355-69.
269. Hussein MR, Roggero E, Sudilovsky EC, Tuthill RJ, Wood GS, Sudilovsky O. Alterations of mismatch repair protein expression in benign melanocytic nevi, melanocytic dysplastic nevi, and cutaneous malignant melanomas. *Am J Dermatopathol* 2001;23(4):308-14.
270. Innominato PF, Libbrecht L, van den Oord JJ. Expression of neurotrophins and their receptors in pigment cell lesions of the skin. *J Pathol* 2001;194(1):95-100.
271. King R, Googe PB, Weilbaecher KN, Mihm MC, Jr., Fisher DE. Microphthalmia transcription factor expression in cutaneous benign, malignant melanocytic, and nonmelanocytic tumors. *Am J Surg Pathol* 2001;25(1):51-7.
272. Loggini B, Rinaldi I, Pingitore R, Cristofani R, Castagna M, Barachini P. Immunohistochemical study of 49 cutaneous melanomas: p53, PCNA, Bcl-2 expression and multidrug resistance. *Tumori* 2001;87(3):179-86.
273. Massi D, Franchi A, Sardi I, Magnelli L, Paglierani M, Borgognoni L, et al. Inducible nitric oxide synthase expression in benign and malignant cutaneous melanocytic lesions. *J Pathol* 2001;194(2):194-200.
274. Polsky D, Young AZ, Busam KJ, Alani RM. The transcriptional repressor of p16/Ink4a, Id1, is up-regulated in early melanomas. *Cancer Res* 2001;61(16):6008-11.
275. Polsky D, Bastian BC, Hazan C, Melzer K, Pack J, Houghton A, et al. HDM2 protein overexpression, but not gene amplification, is related to tumorigenesis of cutaneous melanoma. *Cancer Res* 2001;61(20):7642-6.
276. Quintela I, Vizoso F, Serra C, Gonzalez LO, Fernandez R, Merino AM, et al. Immunohistochemical study of pepsinogen C expression in cutaneous malignant melanoma: association with clinicopathological parameters. *Int J Biol Markers* 2001;16(4):240-4.
277. Ahmed B, Van Den Oord JJ. Expression of the inducible isoform of nitric oxide synthase in pigment cell lesions of the skin. *Br J Dermatol* 2000;142(3):432-40.
278. Aroni K, Charitopoulos KN, Lazaris AC, Davaris P. Lack of vasopressin expression in malignant melanomas. *Melanoma Res* 2000;10(6):535.
279. Bergman R, Azzam H, Sprecher E, Manov L, Munichor M, Friedman-Birnbaum R, et al. A comparative immunohistochemical study of MART-1 expression in Spitz nevi, ordinary melanocytic nevi, and malignant melanomas. *J Am Acad Dermatol* 2000;42(3):496-500.
280. Busam KJ, Iversen K, Berwick M, Spagnoli GC, Old LJ, Jungbluth AA. Immunoreactivity with the anti-MAGE antibody 57B in malignant melanoma: frequency of expression and correlation with prognostic parameters. *Mod Pathol* 2000;13(4):459-65.
281. Hofmann UB, Westphal JR, Waas ET, Becker JC, Ruiter DJ, van Muijen GN. Coexpression of integrin alpha(v)beta3 and matrix metalloproteinase-2 (MMP-2) coincides with MMP-2 activation: correlation with melanoma progression. *J Invest Dermatol* 2000;115(4):625-32.
282. Hofmann UB, Westphal JR, Zendman AJ, Becker JC, Ruiter DJ, van Muijen GN. Expression and activation of matrix metalloproteinase-2 (MMP-2) and its co-localization with membrane-type 1 matrix metalloproteinase (MT1-MMP) correlate with melanoma progression. *J Pathol* 2000;191(3):245-56.
283. Kanter-Lewensohn L, Dricu A, Girnita L, Wejde J, Larsson O. Expression of insulin-like growth factor-1 receptor (IGF-1R) and p27Kip1 in melanocytic tumors: a potential regulatory role of

- IGF-1 pathway in distribution of p27Kip1 between different cyclins. *Growth Factors* 2000;17(3):193-202.
284. Leiter U, Schmid RM, Kaskel P, Peter RU, Krahn G. Antiapoptotic bcl-2 and bcl-xL in advanced malignant melanoma. *Arch Dermatol Res* 2000;292(5):225-32.
285. Persons DL, Arber DA, Sosman JA, Borelli KA, Slovak ML. Amplification and overexpression of HER-2/neu are uncommon in advanced stage melanoma. *Anticancer Res* 2000;20(3B):1965-8.
286. van Kempen LC, van den Oord JJ, van Muijen GN, Weidle UH, Bloemers HP, Swart GW. Activated leukocyte cell adhesion molecule/CD166, a marker of tumor progression in primary malignant melanoma of the skin. *Am J Pathol* 2000;156(3):769-74.
287. Ahmed B, Van Den Oord JJ. Expression of the neuronal isoform of nitric oxide synthase (nNOS) and its inhibitor, protein inhibitor of nNOS, in pigment cell lesions of the skin. *Br J Dermatol* 1999;141(1):12-9.
288. Bayer-Garner IB, Hough AJ, Jr., Smoller BR. Vascular endothelial growth factor expression in malignant melanoma: prognostic versus diagnostic usefulness. *Mod Pathol* 1999;12(8):770-4.
289. Birck A, Kirkin AF, Zeuthen J, Hou-Jensen K. Expression of basic fibroblast growth factor and vascular endothelial growth factor in primary and metastatic melanoma from the same patients. *Melanoma Res* 1999;9(4):375-81.
290. Boni R, Wellmann A, Man YG, Hofbauer G, Brinkmann U. Expression of the proliferation and apoptosis-associated CAS protein in benign and malignant cutaneous melanocytic lesions. *Am J Dermatopathol* 1999;21(2):125-8.
291. Chiodino C, Cesinaro AM, Ottani D, Fantini F, Giannetti A, Trentini GP, et al. Communication: expression of the novel inhibitor of apoptosis survivin in normal and neoplastic skin. *J Invest Dermatol* 1999;113(3):415-8.
292. Easty DJ, Hill SP, Hsu MY, Fallowfield ME, Florenes VA, Herlyn M, et al. Up-regulation of ephrin-A1 during melanoma progression. *Int J Cancer* 1999;84(5):494-501.
293. Goldmann T, Suter L, Ribbert D, Otto F. The expression of proteolytic enzymes at the dermal invading front of primary cutaneous melanoma predicts metastasis. *Pathol Res Pract* 1999;195(3):171-5.
294. Grossman D, McNiff JM, Li F, Altieri DC. Expression and targeting of the apoptosis inhibitor, survivin, in human melanoma. *J Invest Dermatol* 1999;113(6):1076-81.
295. Hartmann A, Kunz M, Kostlin S, Gillitzer R, Toksoy A, Brocker EB, et al. Hypoxia-induced up-regulation of angiogenin in human malignant melanoma. *Cancer Res* 1999;59(7):1578-83.
296. Korabiowska M, Brinck U, Ruschenburg I, Schlott T, Droese M, Stachura J. Bcl2 and Bax expression in naevi and melanomas and their relation to ploidy status and proliferation. *Pol J Pathol* 1999;50(1):17-21.
297. Lowney JK, Boucher LD, Swanson PE, Doherty GM. Interferon regulatory factor-1 and -2 expression in human melanoma specimens. *Ann Surg Oncol* 1999;6(6):604-8.
298. Moretti S, Pinzi C, Spallanzani A, Berti E, Chiarugi A, Mazzoli S, et al. Immunohistochemical evidence of cytokine networks during progression of human melanocytic lesions. *Int J Cancer* 1999;84(2):160-8.
299. Ozer E, Sagol O, Kuyucuoglu F. Ki-67 immunostaining and stereologic estimation of nuclear volume in melanocytic skin tumors. *Anal Quant Cytol Histol* 1999;21(1):42-6.
300. Reed JA, Finnerty B, Albino AP. Divergent cellular differentiation pathways during the invasive stage of cutaneous malignant melanoma progression. *Am J Pathol* 1999;155(2):549-55.
301. Sanders DS, Blessing K, Hassan GA, Bruton R, Marsden JR, Jankowski J. Alterations in cadherin and catenin expression during the biological progression of melanocytic tumours. *Mol Pathol* 1999;52(3):151-7.

302. Singh RK, Varney ML, Bucana CD, Johansson SL. Expression of interleukin-8 in primary and metastatic malignant melanoma of the skin. *Melanoma Res* 1999;9(4):383-7.
303. Sparrow LE, Heenan PJ. Differential expression of epidermal growth factor receptor in melanocytic tumours demonstrated by immunohistochemistry and mRNA in situ hybridization. *Australas J Dermatol* 1999;40(1):19-24.
304. Tschugguel W, Pustelnik T, Lass H, Mildner M, Weninger W, Schneeberger C, et al. Inducible nitric oxide synthase (iNOS) expression may predict distant metastasis in human melanoma. *Br J Cancer* 1999;79(9-10):1609-12.
305. Van Belle PA, Elenitsas R, Satyamoorthy K, Wolfe JT, Guerry Dt, Schuchter L, et al. Progression-related expression of beta3 integrin in melanomas and nevi. *Hum Pathol* 1999;30(5):562-7.
306. Vlaykova T, Laurila P, Muhonen T, Hahka-Kemppinen M, Jekunen A, Alitalo K, et al. Prognostic value of tumour vascularity in metastatic melanoma and association of blood vessel density with vascular endothelial growth factor expression. *Melanoma Res* 1999;9(1):59-68.
307. Zhang XD, Hersey P. Expression of catenins and p120cas in melanocytic nevi and cutaneous melanoma: deficient alpha-catenin expression is associated with melanoma progression. *Pathology* 1999;31(3):239-46.
308. Bergman R, Kerner H, Manov L, Friedman-Birnbaum R. C-fos protein expression in Spitz nevi, common melanocytic nevi, and malignant melanomas. *Am J Dermatopathol* 1998;20(3):262-5.
309. Betke H, Korabiowska M, Brinck U, Trybus-Galuszka H, Kellner S, Okon K, et al. The role of nm23 in melanoma progression and its prognostic significance. *Pol J Pathol* 1998;49(2):93-6.
310. Busam KJ, Chen YT, Old LJ, Stockert E, Iversen K, Coplan KA, et al. Expression of melan-A (MART1) in benign melanocytic nevi and primary cutaneous malignant melanoma. *Am J Surg Pathol* 1998;22(8):976-82.
311. Cormier JN, Hijazi YM, Abati A, Fetsch P, Bettinotti M, Steinberg SM, et al. Heterogeneous expression of melanoma-associated antigens and HLA-A2 in metastatic melanoma in vivo. *Int J Cancer* 1998;75(4):517-24.
312. Goldmann T, Ribbert D, Suter L, Brode M, Otto F. Tumor characteristics involved in the metastatic behaviour as an improvement in primary cutaneous melanoma prognostics. *J Exp Clin Cancer Res* 1998;17(4):483-9.
313. Grant SW, Kyshtoobayeva AS, Kurosaki T, Jakowatz J, Fruehauf JP. Mutant p53 correlates with reduced expression of thrombospondin-1, increased angiogenesis, and metastatic progression in melanoma. *Cancer Detect Prev* 1998;22(3):185-94.
314. Hensley C, Spitzler S, McAlpine BE, Lynn M, Ansel JC, Solomon AR, et al. In vivo human melanoma cytokine production: inverse correlation of GM-CSF production with tumor depth. *Exp Dermatol* 1998;7(6):335-41.
315. Hofbauer GF, Kamarashev J, Geertsen R, Boni R, Dummer R. Tyrosinase immunoreactivity in formalin-fixed, paraffin-embedded primary and metastatic melanoma: frequency and distribution. *J Cutan Pathol* 1998;25(4):204-9.
316. Hofbauer GF, Kamarashev J, Geertsen R, Boni R, Dummer R. Melan A/MART-1 immunoreactivity in formalin-fixed paraffin-embedded primary and metastatic melanoma: frequency and distribution. *Melanoma Res* 1998;8(4):337-43.
317. Keller-Melchior R, Schmidt R, Piepkorn M. Expression of the tumor suppressor gene product p16INK4 in benign and malignant melanocytic lesions. *J Invest Dermatol* 1998;110(6):932-8.
318. Khare VK, Albino AP, Reed JA. The neuropeptide/mast cell secretagogue substance P is expressed in cutaneous melanocytic lesions. *J Cutan Pathol* 1998;25(1):2-10.
319. Silye R, Karayiannakis AJ, Syrigos KN, Poole S, van Noorden S, Batchelor W, et al. E-cadherin/catenin complex in benign and malignant melanocytic lesions. *J Pathol* 1998;186(4):350-5.

320. Sparrow LE, Eldon MJ, English DR, Heenan PJ. p16 and p21/WAF1 protein expression in melanocytic tumors by immunohistochemistry. *Am J Dermatopathol* 1998;20(3):255-61.
321. Tang L, Tron VA, Reed JC, Mah KJ, Krajewska M, Li G, et al. Expression of apoptosis regulators in cutaneous malignant melanoma. *Clin Cancer Res* 1998;4(8):1865-71.
322. Van den Oord JJ. Expression of CD26/dipeptidyl-peptidase IV in benign and malignant pigment-cell lesions of the skin. *Br J Dermatol* 1998;138(4):615-21.
323. Boni R, Heizmann CW, Doguoglu A, Ilg EC, Schafer BW, Dummer R, et al. Ca(2+)-binding proteins S100A6 and S100B in primary cutaneous melanoma. *J Cutan Pathol* 1997;24(2):76-80.
324. de Vries TJ, Fourkour A, Wobbes T, Verkroost G, Ruitter DJ, van Muijen GN. Heterogeneous expression of immunotherapy candidate proteins gp100, MART-1, and tyrosinase in human melanoma cell lines and in human melanocytic lesions. *Cancer Res* 1997;57(15):3223-9.
325. Erhard H, Rietveld FJ, van Altena MC, Brocker EB, Ruitter DJ, de Waal RM. Transition of horizontal to vertical growth phase melanoma is accompanied by induction of vascular endothelial growth factor expression and angiogenesis. *Melanoma Res* 1997;7 Suppl 2(2):S19-26.
326. Jager E, Ringhoffer M, Altmannsberger M, Arand M, Karbach J, Jager D, et al. Immunoselection in vivo: independent loss of MHC class I and melanocyte differentiation antigen expression in metastatic melanoma. *Int J Cancer* 1997;71(2):142-7.
327. Korabiowska M, Betke H, Kellner S, Stachura J, Schauer A. Differential expression of growth arrest, DNA damage genes and tumour suppressor gene p53 in naevi and malignant melanomas. *Anticancer Res* 1997;17(5A):3697-700.
328. Ledda F, Bravo AI, Adris S, Bover L, Mordoh J, Podhajcer OL. The expression of the secreted protein acidic and rich in cysteine (SPARC) is associated with the neoplastic progression of human melanoma. *J Invest Dermatol* 1997;108(2):210-4.
329. Marcoval J, Moreno A, Graells J, Vidal A, Escriba JM, Garcia-Ramirez M, et al. Angiogenesis and malignant melanoma. Angiogenesis is related to the development of vertical (tumorigenic) growth phase. *J Cutan Pathol* 1997;24(4):212-8.
330. Montone KT, van Belle P, Elenitsas R, Elder DE. Proto-oncogene c-kit expression in malignant melanoma: protein loss with tumor progression. *Mod Pathol* 1997;10(9):939-44.
331. Moretti S, Pinzi C, Berti E, Spallanzani A, Chiarugi A, Boddi V, et al. In situ expression of transforming growth factor beta is associated with melanoma progression and correlates with Ki67, HLA-DR and beta 3 integrin expression. *Melanoma Res* 1997;7(4):313-21.
332. Nicotra MR, Nistico P, Mangoni A, Di Filippo F, Marincola FM, Natali PG. Melan-A/MART-1 antigen expression in cutaneous and ocular melanomas. *J Immunother* (1997) 1997;20(6):466-9.
333. Reichrath J, Seyfried P, Braun R, Muller SM, Baum HP, Bahmer FA. Expression of NM23 protein in acquired melanocytic nevi, malignant melanoma and metastases of malignant melanoma: an immunohistological assessment in human skin. *Dermatology* 1997;194(2):136-9.
334. Rudolph P, Schubert C, Schubert B, Parwaresch R. Proliferation marker Ki-S5 as a diagnostic tool in melanocytic lesions. *J Am Acad Dermatol* 1997;37(2 Pt 1):169-78.
335. Salven P, Heikkila P, Joensuu H. Enhanced expression of vascular endothelial growth factor in metastatic melanoma. *Br J Cancer* 1997;76(7):930-4.
336. Seelentag WK, Boni R, Gunthert U, Futo E, Burg G, Heitz PU, et al. Expression of CD44 isoforms and beta 1,6-branched oligosaccharides in human malignant melanoma is correlated with tumor progression but not with metastatic potential. *J Cutan Pathol* 1997;24(4):206-11.
337. Trotter MJ, Tang L, Tron VA. Overexpression of the cyclin-dependent kinase inhibitor p21(WAF1/CIP1) in human cutaneous malignant melanoma. *J Cutan Pathol* 1997;24(5):265-71.
338. van den Oord JJ, Paemen L, Opdenakker G, de Wolf-Peeters C. Expression of gelatinase B and the extracellular matrix metalloproteinase inducer EMMPRIN in benign and malignant pigment cell lesions of the skin. *Am J Pathol* 1997;151(3):665-70.

339. Weiss J, Biwer B, Schliz M, Jung EG. Clinicopathological and prognostic relevance of Rap1-GAP expression in melanocytic tumors. *Arch Dermatol Res* 1997;289(10):573-7.
340. Brasoveanu LI, Altomonte M, Fonsatti E, Colizzi F, Coral S, Nicotra MR, et al. Levels of cell membrane CD59 regulate the extent of complement-mediated lysis of human melanoma cells. *Lab Invest* 1996;74(1):33-42.
341. Danen EH, de Vries TJ, Morandini R, Ghanem GG, Ruiter DJ, van Muijen GN. E-cadherin expression in human melanoma. *Melanoma Res* 1996;6(2):127-31.
342. De Vries TJ, De Wit PE, Clemmensen I, Verspaget HW, Weidle UH, Brocker EB, et al. Tetranection and plasmin/plasminogen are similarly distributed at the invasive front of cutaneous melanoma lesions. *J Pathol* 1996;179(3):260-5.
343. de Vries TJ, Verheijen JH, de Bart AC, Weidle UH, Ruiter DJ, van Muijen GN. Decreased expression of both the low-density lipoprotein receptor-related protein/alpha(2)-macroglobulin receptor and its receptor-associated protein in late stages of cutaneous melanocytic tumor progression. *Cancer Res* 1996;56(6):1432-9.
344. Easty DJ, Maung K, Lascu I, Veron M, Fallowfield ME, Hart IR, et al. Expression of NM23 in human melanoma progression and metastasis. *Br J Cancer* 1996;74(1):109-14.
345. Francia G, Mitchell SD, Moss SE, Hanby AM, Marshall JF, Hart IR. Identification by differential display of annexin-VI, a gene differentially expressed during melanoma progression. *Cancer Res* 1996;56(17):3855-8.
346. Harwood CA, Green MA, Cook MG. CD44 expression in melanocytic lesions: a marker of malignant progression? *Br J Dermatol* 1996;135(6):876-82.
347. Lee CS, Pirdas A, Lee MW. Immunohistochemical demonstration of the nm23-H1 gene product in human malignant melanoma and Spitz nevi. *Pathology* 1996;28(3):220-4.
348. Marincola FM, Hijazi YM, Fetsch P, Salgaller ML, Rivoltini L, Cormier J, et al. Analysis of expression of the melanoma-associated antigens MART-1 and gp100 in metastatic melanoma cell lines and in in situ lesions. *J Immunother Emphasis Tumor Immunol* 1996;19(3):192-205.
349. Reed JA, McNutt NS, Bogdany JK, Albino AP. Expression of the mast cell growth factor interleukin-3 in melanocytic lesions correlates with an increased number of mast cells in the perilesional stroma: implications for melanoma progression. *J Cutan Pathol* 1996;23(6):495-505.
350. Simon JC, Heider KH, Dietrich A, Wuttig C, Schopf E, Adolf GR, et al. Expression of CD44 isoforms in human skin cancer. *Eur J Cancer* 1996;32A(8):1394-400.
351. Van Belle P, Rodeck U, Nuamah I, Halpern AC, Elder DE. Melanoma-associated expression of transforming growth factor-beta isoforms. *Am J Pathol* 1996;148(6):1887-94.
352. Xerri L, Battyani Z, Grob JJ, Parc P, Hassoun J, Bonerandi JJ, et al. Expression of FGF1 and FGFR1 in human melanoma tissues. *Melanoma Res* 1996;6(3):223-30.
353. Brasoveanu LI, Altomonte M, Gloghini A, Fonsatti E, Coral S, Gasparollo A, et al. Expression of protectin (CD59) in human melanoma and its functional role in cell- and complement-mediated cytotoxicity. *Int J Cancer* 1995;61(4):548-56.
354. Cerroni L, Soyer HP, Kerl H. bcl-2 protein expression in cutaneous malignant melanoma and benign melanocytic nevi. *Am J Dermatopathol* 1995;17(1):7-11.
355. Chetty R, Cerroni L, Pulford K, Giatromanolaki A, Biddolph S, Kaklamanis L, et al. TAL1 gene deletions and TAL1 protein expression in sporadic melanoma. *Melanoma Res* 1995;5(4):251-4.
356. Danen EH, Jansen KF, Van Kraats AA, Cornelissen IM, Ruiter DJ, Van Muijen GN. Alpha v-integrins in human melanoma: gain of alpha v beta 3 and loss of alpha v beta 5 are related to tumor progression in situ but not to metastatic capacity of cell lines in nude mice. *Int J Cancer* 1995;61(4):491-6.
357. Gelsleichter L, Gown AM, Zarbo RJ, Wang E, Coltrera MD. p53 and mdm-2 expression in malignant melanoma: an immunocytochemical study of expression of p53, mdm-2, and markers of cell proliferation in primary versus metastatic tumors. *Mod Pathol* 1995;8(5):530-5.

358. Korabiowska M, Brinck U, Mirecka J, Kellner S, Marx D, Schauer A. Antigen Ki-67 and c-myc oncogene as related to histoclinical parameters in pigmented skin lesions. *In Vivo* 1995;9(5):433-8.
359. Lee CS, Pirdas A, Lee MW. p53 in cutaneous melanoma: immunoreactivity and correlation with prognosis. *Australas J Dermatol* 1995;36(4):192-5.
360. Mirecka J, Korabiowska M, Schauer A. Comparative distribution of S-100 protein and antigen HMB-45 in various types of melanomas and naevi. *Pol J Pathol* 1995;46(3):167-72.
361. Natali PG, Nicotra MR, Di Filippo F, Bigotti A. Expression of fibronectin, fibronectin isoforms and integrin receptors in melanocytic lesions. *Br J Cancer* 1995;71(6):1243-7.
362. Platz A, Ringborg U, Grafstrom E, Hoog A, Lagerlof B. Immunohistochemical analysis of the N-ras p21 and the p53 proteins in naevi, primary tumours and metastases of human cutaneous malignant melanoma: increased immunopositivity in hereditary melanoma. *Melanoma Res* 1995;5(2):101-6.
363. Podhajcer OL, Bover L, Bravo AI, Ledda MF, Kairiyama C, Calb I, et al. Expression of cathepsin D in primary and metastatic human melanoma and dysplastic nevi. *J Invest Dermatol* 1995;104(3):340-4.
364. Poremba C, Yandell DW, Metze D, Kamanabrou D, Bocker W, Dockhorn-Dworniczak B. Immunohistochemical detection of p53 in melanomas with rare p53 gene mutations is associated with mdm-2 overexpression. *Oncol Res* 1995;7(7-8):331-9.
365. Ramsay JA, From L, Kahn HJ. bcl-2 protein expression in melanocytic neoplasms of the skin. *Mod Pathol* 1995;8(2):150-4.
366. Reed JA, Loganzo F, Jr., Shea CR, Walker GJ, Flores JF, Glendening JM, et al. Loss of expression of the p16/cyclin-dependent kinase inhibitor 2 tumor suppressor gene in melanocytic lesions correlates with invasive stage of tumor progression. *Cancer Res* 1995;55(13):2713-8.
367. Rudolph P, Lappe T, Schubert C, Schmidt D, Parwaresch RM, Christophers E. Diagnostic assessment of two novel proliferation-specific antigens in benign and malignant melanocytic lesions. *Am J Pathol* 1995;147(6):1615-25.
368. Schadendorf D, Jurgovsky K, Kohlmus CM, Czarnetzki BM. Glutathione and related enzymes in tumor progression and metastases of human melanoma. *J Invest Dermatol* 1995;105(1):109-12.
369. Sparrow LE, Soong R, Dawkins HJ, Iacopetta BJ, Heenan PJ. p53 gene mutation and expression in naevi and melanomas. *Melanoma Res* 1995;5(2):93-100.
370. Weiss J, Heine M, Korner B, Pilch H, Jung EG. Expression of p53 protein in malignant melanoma: clinicopathological and prognostic implications. *Br J Dermatol* 1995;133(1):23-31.
371. Danen EH, Ten Berge PJ, Van Muijen GN, Van 't Hof-Grootenboer AE, Brocker EB, Ruiter DJ. Emergence of alpha 5 beta 1 fibronectin- and alpha v beta 3 vitronectin-receptor expression in melanocytic tumour progression. *Histopathology* 1994;24(3):249-56.
372. de Vries TJ, Quax PH, Denijn M, Verrijp KN, Verheijen JH, Verspaget HW, et al. Plasminogen activators, their inhibitors, and urokinase receptor emerge in late stages of melanocytic tumor progression. *Am J Pathol* 1994;144(1):70-81.
373. Saenz-Santamaria MC, Reed JA, McNutt NS, Shea CR. Immunohistochemical expression of BCL-2 in melanomas and intradermal nevi. *J Cutan Pathol* 1994;21(5):393-7.
374. Si Z, Hersey P. Immunohistological examination of the relationship between metastatic potential and expression of adhesion molecules and 'selectins' on melanoma cells. *Pathology* 1994;26(1):6-15.
375. van den Oord JJ, Vandeghinste N, De Ley M, De Wolf-Peeters C. Bcl-2 expression in human melanocytes and melanocytic tumors. *Am J Pathol* 1994;145(2):294-300.
376. von Schoultz E, Carlstrom K, Henriksson R, Lagerlof B, Hansson J. Estramustine binding protein in primary tumours and metastases of malignant melanoma. *Melanoma Res* 1994;4(6):401-5.

377. Bishop PW, Menasce LP, Yates AJ, Win NA, Banerjee SS. An immunophenotypic survey of malignant melanomas. *Histopathology* 1993;23(2):159-66.
378. Carrel S, Zografos L, Schreyer M, Rimoldi D. Expression of CALLA/CD10 on human melanoma cells. *Melanoma Res* 1993;3(5):319-23.
379. Lassam NJ, From L, Kahn HJ. Overexpression of p53 is a late event in the development of malignant melanoma. *Cancer Res* 1993;53(10 Suppl):2235-8.
380. McGregor JM, Yu CC, Dublin EA, Barnes DM, Levison DA, MacDonald DM. p53 immunoreactivity in human malignant melanoma and dysplastic naevi. *Br J Dermatol* 1993;128(6):606-11.
381. Natali PG, Nicotra MR, Di Renzo MF, Prat M, Bigotti A, Cavaliere R, et al. Expression of the c-Met/HGF receptor in human melanocytic neoplasms: demonstration of the relationship to malignant melanoma tumour progression. *Br J Cancer* 1993;68(4):746-50.
382. Rieger E, Hofmann-Wellenhof R, Soyer HP, Kofler R, Cerroni L, Smolle J, et al. Comparison of proliferative activity as assessed by proliferating cell nuclear antigen (PCNA) and Ki-67 monoclonal antibodies in melanocytic skin lesions. A quantitative immunohistochemical study. *J Cutan Pathol* 1993;20(3):229-36.
383. Schadendorf D, Gawlik C, Haney U, Ostmeier H, Suter L, Czarnetzki BM. Tumour progression and metastatic behaviour in vivo correlates with integrin expression on melanocytic tumours. *J Pathol* 1993;170(4):429-34.
384. Vacca A, Ribatti D, Roncali L, Lospalluti M, Serio G, Carrel S, et al. Melanocyte tumor progression is associated with changes in angiogenesis and expression of the 67-kilodalton laminin receptor. *Cancer* 1993;72(2):455-61.
385. de Wit PE, Moretti S, Koenders PG, Weterman MA, van Muijen GN, Gianotti B, et al. Increasing epidermal growth factor receptor expression in human melanocytic tumor progression. *J Invest Dermatol* 1992;99(2):168-73.
386. Denton KJ, Stretch JR, Gatter KC, Harris AL. A study of adhesion molecules as markers of progression in malignant melanoma. *J Pathol* 1992;167(2):187-91.
387. Jonjic N, Martin-Padura I, Pollicino T, Bernasconi S, Jilek P, Bigotti A, et al. Regulated expression of vascular cell adhesion molecule-1 in human malignant melanoma. *Am J Pathol* 1992;141(6):1323-30.
388. Natali PG, Nicotra MR, Cavaliere R, Giannarelli D, Bigotti A. Tumor progression in human malignant melanoma is associated with changes in alpha 6/beta 1 laminin receptor. *Int J Cancer* 1991;49(2):168-72.
389. Stretch JR, Gatter KC, Ralfkiaer E, Lane DP, Harris AL. Expression of mutant p53 in melanoma. *Cancer Res* 1991;51(21):5976-9.
390. Takahashi H, Strutton GM, Parsons PG. Determination of proliferating fractions in malignant melanomas by anti-PCNA/cyclin monoclonal antibody. *Histopathology* 1991;18(3):221-7.
391. Wollina U, Kilian U, Henkel U, Schaarschmidt H, Knopf B. The initial steps of tumor progression in melanocytic lineage: a histochemical approach. *Anticancer Res* 1991;11(4):1405-14.
392. Cho KH, Hashimoto K, Taniguchi Y, Pietruk T, Zarbo RJ, An T. Immunohistochemical study of melanocytic nevus and malignant melanoma with monoclonal antibodies against S-100 subunits. *Cancer* 1990;66(4):765-71.
393. Cohen C, DeRose PB, Campbell WG, Schlosnagle DC, Sgoutas D. Estrogen receptor status in malignant melanoma. *Am J Dermatopathol* 1990;12(6):562-4.
394. Natali P, Nicotra MR, Cavaliere R, Bigotti A, Romano G, Temponi M, et al. Differential expression of intercellular adhesion molecule 1 in primary and metastatic melanoma lesions. *Cancer Res* 1990;50(4):1271-8.

395. van Muijen GN, Ruiter DJ, Hoefakker S, Johnson JP. Monoclonal antibody PAL-M1 recognizes the transferrin receptor and is a progression marker in melanocytic lesions. *J Invest Dermatol* 1990;95(1):65-9.
396. Zarbo RJ, Gown AM, Nagle RB, Visscher DW, Crissman JD. Anomalous cytokeratin expression in malignant melanoma: one- and two-dimensional western blot analysis and immunohistochemical survey of 100 melanomas. *Mod Pathol* 1990;3(4):494-501.
397. Johnson JP, Stade BG, Holzmann B, Schwable W, Riethmuller G. De novo expression of intercellular-adhesion molecule 1 in melanoma correlates with increased risk of metastasis. *Proc Natl Acad Sci U S A* 1989;86(2):641-4.
398. Kaudewitz P, Braun-Falco O, Ernst M, Landthaler M, Stolz W, Gerdes J. Tumor cell growth fractions in human malignant melanomas and the correlation to histopathologic tumor grading. *Am J Pathol* 1989;134(5):1063-8.
399. Smolle J, Soyer HP, Kerl H. Proliferative activity of cutaneous melanocytic tumors defined by Ki-67 monoclonal antibody. A quantitative immunohistochemical study. *Am J Dermatopathol* 1989;11(4):301-7.
400. Natali PG, Roberts JT, Difilippo F, Bigotti A, Dent PB, Ferrone S, et al. Immunohistochemical detection of antigen in human primary and metastatic melanomas by the monoclonal antibody 140.240 and its possible prognostic significance. *Cancer* 1987;59(1):55-63.
401. Hagen EC, Vennegoor C, Schlingemann RO, van der Velde EA, Ruiter DJ. Correlation of histopathological characteristics with staining patterns in human melanoma assessed by (monoclonal) antibodies reactive on paraffin sections. *Histopathology* 1986;10(7):689-700.
402. Ruiter DJ, Bergman W, Welvaart K, Scheffer E, van Vloten WA, Russo C, et al. Immunohistochemical analysis of malignant melanomas and nevocellular nevi with monoclonal antibodies to distinct monomorphic determinants of HLA antigens. *Cancer Res* 1984;44(9):3930-5.
403. Chakravarti N, Lotan R, Diwan AH, Warneke CL, Johnson MM, Prieto VG. Decreased expression of retinoid receptors in melanoma: entailment in tumorigenesis and prognosis. *Clin Cancer Res* 2007;13(16):4817-24.
404. Mihic-Probst D, Kuster A, Kilgus S, Bode-Lesniewska B, Ingold-Heppner B, Leung C, et al. Consistent expression of the stem cell renewal factor BMI-1 in primary and metastatic melanoma. *Int J Cancer* 2007;121(8):1764-70.
405. Mnich CD, Hoek KS, Oberholzer PA, Seifert B, Hafner J, Dummer R, et al. Reduced pSmad2 immunodetection correlates with increased primary melanoma thickness. *Melanoma Res* 2007;17(2):131-6.
406. Tchernev G, Orfanos CE. Downregulation of cell cycle modulators p21, p27, p53, Rb and proapoptotic Bcl-2-related proteins Bax and Bak in cutaneous melanoma is associated with worse patient prognosis: preliminary findings. *J Cutan Pathol* 2007;34(3):247-56.
407. Velazquez EF, Jungbluth AA, Yancovitz M, Gnjjatic S, Adams S, O'Neill D, et al. Expression of the cancer/testis antigen NY-ESO-1 in primary and metastatic malignant melanoma (MM)-- correlation with prognostic factors. *Cancer Immun* 2007;7(11):11.
408. Velazquez EF, Yancovitz M, Pavlick A, Berman R, Shapiro R, Bogunovic D, et al. Clinical relevance of neutral endopeptidase (NEP/CD10) in melanoma. *J Transl Med* 2007;5(2):2.
409. Zhuang L, Lee CS, Scolyer RA, McCarthy SW, Zhang XD, Thompson JF, et al. Mcl-1, Bcl-XL and Stat3 expression are associated with progression of melanoma whereas Bcl-2, AP-2 and MITF levels decrease during progression of melanoma. *Mod Pathol* 2007;20(4):416-26.
410. Monteagudo C, Martin JM, Jorda E, Llombart-Bosch A. CXCR3 chemokine receptor immunoreactivity in primary cutaneous malignant melanoma: correlation with clinicopathologic prognostic factors. *J Clin Pathol* 2007;60(6):596-9.
411. Tang L, Dai DL, Su M, Martinka M, Li G, Zhou Y. Aberrant expression of collagen triple helix repeat containing 1 in human solid cancers. *Clin Cancer Res* 2006;12(12):3716-22.

412. Wild PJ, Meyer S, Bataille F, Woenckhaus M, Ameres M, Vogt T, et al. Tissue microarray analysis of methylthioadenosine phosphorylase protein expression in melanocytic skin tumors. *Arch Dermatol* 2006;142(4):471-6.
413. Zhuang L, Lee CS, Scolyer RA, McCarthy SW, Zhang XD, Thompson JF, et al. Progression in melanoma is associated with decreased expression of death receptors for tumor necrosis factor-related apoptosis-inducing ligand. *Hum Pathol* 2006;37(10):1286-94.
414. Corte MD, Gonzalez LO, Corte MG, Quintela I, Pidal I, Bongera M, et al. Collagenase-3 (MMP-13) expression in cutaneous malignant melanoma. *Int J Biol Markers* 2005;20(4):242-8.
415. Roesch A, Becker B, Meyer S, Hafner C, Wild PJ, Landthaler M, et al. Overexpression and hyperphosphorylation of retinoblastoma protein in the progression of malignant melanoma. *Mod Pathol* 2005;18(4):565-72.
416. Wu H, Barusevicius A, Babb J, Klein-Szanto A, Godwin A, Elenitsas R, et al. Pleiotrophin expression correlates with melanocytic tumor progression and metastatic potential. *J Cutan Pathol* 2005;32(2):125-30.
417. Bron LP, Scolyer RA, Thompson JF, Hersey P. Histological expression of tumour necrosis factor-related apoptosis-inducing ligand (TRAIL) in human primary melanoma. *Pathology* 2004;36(6):561-5.
418. Forster-Horvath C, Dome B, Paku S, Ladanyi A, Somlai B, Jalkanen S, et al. Loss of vascular adhesion protein-1 expression in intratumoral microvessels of human skin melanoma. *Melanoma Res* 2004;14(2):135-40.
419. Innocenzi D, Alo PL, Balzani A, Sebastiani V, Silipo V, La Torre G, et al. Fatty acid synthase expression in melanoma. *J Cutan Pathol* 2003;30(1):23-8.
420. Jonjic N, Zamolo G, Stifter S, Fuckar D, Gruber F, Sasso F, et al. Cytomorphological variations, proliferation and angiogenesis in the prognosis of cutaneous melanoma. *Clin Exp Dermatol* 2003;28(3):310-4.
421. Woenckhaus C, Giebel J, Failing K, Fenic I, Dittberner T, Poetsch M. Expression of AP-2alpha, c-kit, and cleaved caspase-6 and -3 in naevi and malignant melanomas of the skin. A possible role for caspases in melanoma progression? *J Pathol* 2003;201(2):278-87.
422. Brinck U, Ruschenburg I, Di Como CJ, Buschmann N, Betke H, Stachura J, et al. Comparative study of p63 and p53 expression in tissue microarrays of malignant melanomas. *Int J Mol Med* 2002;10(6):707-11.
423. Dawn G, MacKie RM. Expression of endoglin in human melanocytic lesions. *Clin Exp Dermatol* 2002;27(2):153-6.
424. Eliopoulos P, Mohammed MQ, Henry K, Retsas S. Overexpression of HER-2 in thick melanoma. *Melanoma Res* 2002;12(2):139-45.
425. Middleman BR, Friedman M, Lawson DH, DeRose PB, Cohen C. Melanoma growth stimulatory activity in primary malignant melanoma: prognostic significance. *Mod Pathol* 2002;15(5):532-7.
426. Berset M, Cerottini JP, Guggisberg D, Romero P, Burri F, Rimoldi D, et al. Expression of Melan-A/MART-1 antigen as a prognostic factor in primary cutaneous melanoma. *Int J Cancer* 2001;95(1):73-7.
427. Kamarashev J, Ferrone S, Seifert B, Boni R, Nestle FO, Burg G, et al. TAP1 down-regulation in primary melanoma lesions: an independent marker of poor prognosis. *Int J Cancer* 2001;95(1):23-8.
428. Nikkola J, Vihinen P, Vlaykova T, Hahka-Kemppinen M, Kahari VM, Pyrhonen S. High collagenase-1 expression correlates with a favourable chemoimmunotherapy response in human metastatic melanoma. *Melanoma Res* 2001;11(2):157-66.

429. Korabiowska M, Brinck U, Middel P, Brinkmann U, Berger H, Radzun HJ, et al. Proliferative activity in the progression of pigmented skin lesions, diagnostic and prognostic significance. *Anticancer Res* 2000;20(3A):1781-5.
430. Salti GI, Manougian T, Farolan M, Shilkaitis A, Majumdar D, Das Gupta TK. Microphthalmia transcription factor: a new prognostic marker in intermediate-thickness cutaneous malignant melanoma. *Cancer Res* 2000;60(18):5012-6.
431. Strebhardt K, Kneisel L, Linhart C, Bernd A, Kaufmann R. Prognostic value of pololike kinase expression in melanomas. *JAMA* 2000;283(4):479-80.
432. Vihinen P, Nikkola J, Vlaykova T, Hahka-Kemppinen M, Talve L, Heino J, et al. Prognostic value of beta1 integrin expression in metastatic melanoma. *Melanoma Res* 2000;10(3):243-51.
433. Ciotti P, Pesce GP, Cafiero F, Rainero ML, Sementa A, Nicolo G, et al. Intercellular adhesion molecule-1 (ICAM-1) and granulocyte-macrophage colony stimulating factor (GM-CSF) co-expression in cutaneous malignant melanoma lesions. *Melanoma Res* 1999;9(3):253-60.
434. Vlaykova T, Talve L, Hahka-Kemppinen M, Hernberg M, Muhonen T, Franssila K, et al. MIB-1 immunoreactivity correlates with blood vessel density and survival in disseminated malignant melanoma. *Oncology* 1999;57(3):242-52.
435. Boni R, Bantschapp O, Muller B, Burg G. c-myc is not useful as prognostic immunohistochemical marker in cutaneous melanoma. *Dermatology* 1998;196(3):288-91.
436. Essner R, Kuo CT, Wang H, Wen DR, Turner RR, Nguyen T, et al. Prognostic implications of p53 overexpression in cutaneous melanoma from sun-exposed and nonexposed sites. *Cancer* 1998;82(2):309-16.
437. Florenes VA, Maelandsmo GM, Kerbel RS, Slingerland JM, Nesland JM, Holm R. Protein expression of the cell-cycle inhibitor p27Kip1 in malignant melanoma: inverse correlation with disease-free survival. *Am J Pathol* 1998;153(1):305-12.
438. Healy E, Belgaid C, Takata M, Harrison D, Zhu NW, Burd DA, et al. Prognostic significance of allelic losses in primary melanoma. *Oncogene* 1998;16(17):2213-8.
439. Konstadoulakis MM, Vezeridis M, Hatziyianni E, Karakousis CP, Cole B, Bland KI, et al. Molecular oncogene markers and their significance in cutaneous malignant melanoma. *Ann Surg Oncol* 1998;5(3):253-60.
440. Bjornhagen V, Lindholm J, Auer G. Analysis of nuclear DNA and morphometry, and proliferating cell nuclear antigen in primary and metastatic malignant melanoma. *Scand J Plast Reconstr Surg Hand Surg* 1997;31(2):109-18.
441. Dietrich A, Tanczos E, Vanscheidt W, Schopf E, Simon JC. High CD44 surface expression on primary tumours of malignant melanoma correlates with increased metastatic risk and reduced survival. *Eur J Cancer* 1997;33(6):926-30.
442. Natali PG, Hamby CV, Felding-Habermann B, Liang B, Nicotra MR, Di Filippo F, et al. Clinical significance of alpha(v)beta3 integrin and intercellular adhesion molecule-1 expression in cutaneous malignant melanoma lesions. *Cancer Res* 1997;57(8):1554-60.
443. van den Oord JJ, Maes A, Stas M, Nuyts J, De Wever I, De Wolf-Peeters C. Prognostic significance of nm23 protein expression in malignant melanoma. An immunohistochemical study. *Melanoma Res* 1997;7(2):121-8.
444. Vielkind JR, Huhn K, Tron VA. The Xiphophorus-derived antibody, XMEL, shows sensitivity and specificity for human cutaneous melanoma but is not a prognostic marker. *J Cutan Pathol* 1997;24(10):620-7.
445. Boni R, Doguoglu A, Burg G, Muller B, Dummer R. MIB-1 immunoreactivity correlates with metastatic dissemination in primary thick cutaneous melanoma. *J Am Acad Dermatol* 1996;35(3 Pt 1):416-8.
446. Hieken TJ, Farolan M, Ronan SG, Shilkaitis A, Wild L, Das Gupta TK. Beta3 integrin expression in melanoma predicts subsequent metastasis. *J Surg Res* 1996;63(1):169-73.

447. Maelandsmo GM, Holm R, Fodstad O, Kerbel RS, Florenes VA. Cyclin kinase inhibitor p21WAF1/CIP1 in malignant melanoma: reduced expression in metastatic lesions. *Am J Pathol* 1996;149(6):1813-22.
448. van den Oord JJ, Maes A, Stas M, Nuyts J, Battocchio S, Kasran A, et al. CD40 is a prognostic marker in primary cutaneous malignant melanoma. *Am J Pathol* 1996;149(6):1953-61.
449. Lazaris AC, Theodoropoulos GE, Aroni K, Saetta A, Davaris PS. Immunohistochemical expression of C-myc oncogene, heat shock protein 70 and HLA-DR molecules in malignant cutaneous melanoma. *Virchows Arch* 1995;426(5):461-7.
450. Schadendorf D, Heidel J, Gawlik C, Suter L, Czarnetzki BM. Association with clinical outcome of expression of VLA-4 in primary cutaneous malignant melanoma as well as P-selectin and E-selectin on intratumoral vessels. *J Natl Cancer Inst* 1995;87(5):366-71.
451. Casazza S, Gambini C, Tunesi G, Rovida S, Caruso F, Pastorino A, et al. [Expression of P53 protein in cutaneous melanoma]. *Pathologica* 1993;85(1097):335-42.
452. Woosley JT, Dietrich DR. Prognostic significance of PCNA grade in malignant melanoma. *J Cutan Pathol* 1993;20(6):498-503.
453. Zelger B, Hittmair A, Schir M, Ofner C, Ofner D, Fritsch PO, et al. Immunohistochemically demonstrated metallothionein expression in malignant melanoma. *Histopathology* 1993;23(3):257-63.
454. Soyer HP. Ki 67 immunostaining in melanocytic skin tumors. Correlation with histologic parameters. *J Cutan Pathol* 1991;18(4):264-72.
455. Natali PG, Nicotra MR, Nuti M, Bigotti G, Calabro A, Schlom J, et al. Molecular profile, tissue distribution and prognostic evaluation of a human melanoma-carcinoma antigen recognized by the murine monoclonal antibody B1.1. *Int J Biol Markers* 1988;3(4):211-20.
456. Pocza P, Suli-Vargha H, Darvas Z, Falus A. Locally generated VGVAPG and VAPG elastin-derived peptides amplify melanoma invasion via the galectin-3 receptor. *Int J Cancer* 2008;122(9):1972-1980.
457. Brezillon S, Venteo L, Ramont L, D'Onofrio MF, Perreau C, Pluot M, et al. Expression of lumican, a small leucine-rich proteoglycan with antitumour activity, in human malignant melanoma. *Clin Exp Dermatol* 2007;32(4):405-16.
458. Huszar M, Moldenhauer G, Gschwend V, Ben-Arie A, Altevogt P, Fogel M. Expression profile analysis in multiple human tumors identifies L1 (CD171) as a molecular marker for differential diagnosis and targeted therapy. *Hum Pathol* 2006;37(8):1000-8. Epub 2006 Jun 21.
459. Straume O, Akslen LA. Increased expression of VEGF-receptors (FLT-1, KDR, NRP-1) and thrombospondin-1 is associated with glomeruloid microvascular proliferation, an aggressive angiogenic phenotype, in malignant melanoma. *Angiogenesis* 2003;6(4):295-301.
460. Hussein MR, Sun M, Roggero E, Sudilovsky EC, Tuthill RJ, Wood GS, et al. Loss of heterozygosity, microsatellite instability, and mismatch repair protein alterations in the radial growth phase of cutaneous malignant melanomas. *Mol Carcinog* 2002;34(1):35-44.
461. Van Duinen CM, Fleuren GJ, Bruijn JA. The extracellular matrix in pigmented skin lesions: an immunohistochemical study. *Histopathology* 1994;24(1):33-40.
462. Tao J, Li Y, Liu YQ, Li L, Liu J, Shen X, et al. Expression of transporters associated with antigen processing and human leucocyte antigen class I in malignant melanoma and its association with prognostic factors. *Br J Dermatol* 2008;158(1):88-94.
463. Kawasaki K, Kawakami T, Watabe H, Itoh F, Mizoguchi M, Soma Y. Expression of matrilysin (matrix metalloproteinase-7) in primary cutaneous and metastatic melanoma. *Br J Dermatol* 2007;156(4):613-9.
464. Liao YH, Hsu SM, Huang PH. ARMS depletion facilitates UV irradiation induced apoptotic cell death in melanoma. *Cancer Res* 2007;67(24):11547-56.

465. Wu Y, Zhang XB, Liu HJ, Zheng LD, Li JW, Lin Y. [Expression of neutral endopeptidase and motility-related protein-1 in cutaneous malignant melanoma]. *Zhonghua Bing Li Xue Za Zhi* 2007;36(7):466-9.
466. Nishimura K, Hirokawa YS, Mizutani H, Shiraishi T. Reduced heterochromatin protein 1-beta (HP1beta) expression is correlated with increased invasive activity in human melanoma cells. *Anticancer Res* 2006;26(6B):4349-56.
467. Mustika R, Budiyanto A, Nishigori C, Ichihashi M, Ueda M. Decreased expression of Apaf-1 with progression of melanoma. *Pigment Cell Res* 2005;18(1):59-62.
468. Nishizawa A, Nakanishi Y, Yoshimura K, Sasajima Y, Yamazaki N, Yamamoto A, et al. Clinicopathologic significance of dysadherin expression in cutaneous malignant melanoma: immunohistochemical analysis of 115 patients. *Cancer* 2005;103(8):1693-700.
469. Kageshita T, Ishihara T, Tokuo H, Funasaka Y, Ichihashi M, Dong J, et al. Widespread expression of parathyroid hormone-related peptide in melanocytic cells. *Br J Dermatol* 2003;148(3):533-8.
470. Koganehira Y, Takeoka M, Ehara T, Sasaki K, Murata H, Saida T, et al. Reduced expression of actin-binding proteins, h-caldesmon and calponin h1, in the vascular smooth muscle inside melanoma lesions: an adverse prognostic factor for malignant melanoma. *Br J Dermatol* 2003;148(5):971-80.
471. Sato H, Nagashima Y, Chrousos GP, Ichihashi M, Funasak Y. The expression of corticotropin-releasing hormone in melanoma. *Pigment Cell Res* 2002;15(2):98-103.
472. Shukuwa T, Katayama I, Koji T. Fas-mediated apoptosis of melanoma cells and infiltrating lymphocytes in human malignant melanomas. *Mod Pathol* 2002;15(4):387-96.
473. Kageshita T, Kawakami Y, Ono T. Clinical significance of MART-1 and HLA-A2 expression and CD8+ T cell infiltration in melanocytic lesions in HLA-A2 phenotype patients. *J Dermatol Sci* 2001;25(1):36-44.
474. Kageshita T, Funasaka Y, Ichihashi M, Wakamatsu K, Ito S, Ono T. Tissue factor expression and serum level in patients with melanoma does not correlate with disease progression. *Pigment Cell Res* 2001;14(3):195-200.
475. Sugita K, Yamamoto O, Asahi M. Immunohistochemical analysis of metallothionein expression in malignant melanoma in Japanese patients. *Am J Dermatopathol* 2001;23(1):29-35.
476. Kageshita T, Hamby CV, Hirai S, Kimura T, Ono T, Ferrone S. Alpha(v)beta3 expression on blood vessels and melanoma cells in primary lesions: differential association with tumor progression and clinical prognosis. *Cancer Immunol Immunother* 2000;49(6):314-8.
477. Torisu-Itakura H, Furue M, Kuwano M, Ono M. Co-expression of thymidine phosphorylase and heme oxygenase-1 in macrophages in human malignant vertical growth melanomas. *Jpn J Cancer Res* 2000;91(9):906-10.
478. Funasaka Y, Sato H, Chakraborty AK, Ohashi A, Chrousos GP, Ichihashi M. Expression of proopiomelanocortin, corticotropin-releasing hormone (CRH), and CRH receptor in melanoma cells, nevus cells, and normal human melanocytes. *J Investig Dermatol Symp Proc* 1999;4(2):105-9.
479. Grover R, Chana J, Grobbelaar AO, Hudson DA, Forder M, Wilson GD, et al. Measurement of c-myc oncogene expression provides an accurate prognostic marker for acral lentiginous melanoma. *Br J Plast Surg* 1999;52(2):122-6.
480. Ichikawa T, Masumoto J, Kaneko M, Saida T, Sagara J, Taniguchi S. Moesin and CD44 expression in cutaneous melanocytic tumours. *Br J Dermatol* 1998;138(5):763-8.
481. Nagahama M, Funasaka Y, Fernandez-Frez ML, Ohashi A, Chakraborty AK, Ueda M, et al. Immunoreactivity of alpha-melanocyte-stimulating hormone, adrenocorticotrophic hormone and beta-endorphin in cutaneous malignant melanoma and benign melanocytic naevi. *Br J Dermatol* 1998;138(6):981-5.

482. Chang TG, Wang J, Chen LW, Hsu CY, Chang HW, Chen JS, et al. Loss of expression of the p16 gene is frequent in malignant skin tumors. *Biochem Biophys Res Commun* 1997;230(1):85-8.
483. Kanoko M, Ueda M, Nagano T, Ichihashi M. Expression of p53 protein in melanoma progression. *J Dermatol Sci* 1996;12(2):97-103.
484. Ohashi A, Funasaka Y, Ueda M, Ichihashi M. c-KIT receptor expression in cutaneous malignant melanoma and benign melanotic naevi. *Melanoma Res* 1996;6(1):25-30.
485. Saitoh K, Takahashi H, Yamamoto M, Kishi H, Parsons PG. Expression of metastasis suppressor gene product, nm23 protein, is not inversely correlated with the tumour progression in human malignant melanomas. *Histopathology* 1996;29(6):497-505.
486. Ueda M, Funasaka Y, Ichihashi M, Mishima Y. Stable and strong expression of basic fibroblast growth factor in naevus cell naevus contrasts with aberrant expression in melanoma. *Br J Dermatol* 1994;130(3):320-4.
487. Saitoh K, Takahashi H, Sawada N, Parsons PG. Detection of the c-met proto-oncogene product in normal skin and tumours of melanocytic origin. *J Pathol* 1994;174(3):191-9.
488. Kageshita T, Yoshii A, Kimura T, Kuriya N, Ono T, Tsujisaki M, et al. Clinical relevance of ICAM-1 expression in primary lesions and serum of patients with malignant melanoma. *Cancer Res* 1993;53(20):4927-32.
489. Kondoh M, Ueda M, Ichihashi M, Mishima Y. Decreased expression of human melanoma-associated antigen ME491 along the progression of melanoma pre-canceroses to invasive and metastatic melanomas. *Melanoma Res* 1993;3(4):241-5.
490. Yamamoto M, Takahashi H. Immunohistochemical detection of the p53 oncoprotein in tumours of melanocytic origin. *Virchows Arch A Pathol Anat Histopathol* 1993;422(2):127-32.
491. Hirano T. Immunohistochemical study of malignant melanoma. *Acta Pathol Jpn* 1986;36(5):733-43.
492. Webber BA, Lawson D, Cohen C. Maspin and Mutant p53 Expression in Malignant Melanoma and Carcinoma: Use of Tissue Microarray. *Appl Immunohistochem Mol Morphol* 2008;16(1):19-23.
493. Nambiar S, Mirmohammadsadegh A, Hassan M, Mota R, Marini A, Alaoui A, et al. Identification and functional characterization of ASK/Dbf4, a novel cell survival gene in cutaneous melanoma with prognostic relevance. *Carcinogenesis* 2007;28(12):2501-10.
494. Soikkeli J, Lukk M, Nummela P, Virolainen S, Jahnkola T, Katainen R, et al. Systematic search for the best gene expression markers for melanoma micrometastasis detection. *J Pathol* 2007;213(2):180-9.
495. Winnepenninckx V, van den Oord JJ. Gene expression profiling and clinical outcome in melanoma: in search of novel prognostic factors. *Expert Rev Anticancer Ther* 2007;7(11):1611-31.
496. Carvalho L, Lipay M, Belfort F, Santos I, Andrade J, Haddad A, et al. Telomerase activity in prognostic histopathologic features of melanoma. *J Plast Reconstr Aesthet Surg* 2006;59(9):961-8.
497. Ellerhorst JA, Ekmekcioglu S, Johnson MK, Cooke CP, Johnson MM, Grimm EA. Regulation of iNOS by the p44/42 mitogen-activated protein kinase pathway in human melanoma. *Oncogene* 2006;25(28):3956-62. Epub 2006 Feb 13.
498. Korabiowska M, Brinck U, Stachura J, Jawien J, Hasse FM, Cordon-Cardos C, et al. Exonic deletions of mismatch repair genes MLH1 and MSH2 correlate with prognosis and protein expression levels in malignant melanomas. *Anticancer Res* 2006;26(2A):1231-5.
499. Stabuc B, Mrevlje Z, Markovic J, Stabuc-Silih M. Expression and prognostic significance of Cathepsin L in early cutaneous malignant melanoma. *Neoplasma* 2006;53(3):259-62.
500. Bales E, Mills L, Milam N, McGahren-Murray M, Bandyopadhyay D, Chen D, et al. The low molecular weight cyclin E isoforms augment angiogenesis and metastasis of human melanoma cells in vivo. *Cancer Res* 2005;65(3):692-7.

501. Thies A, Schachner M, Berger J, Moll I, Schulze HJ, Brunner G, et al. The developmentally regulated neural crest-associated glycocone HNK-1 predicts metastasis in cutaneous malignant melanoma. *J Pathol* 2004;203(4):933-9.
502. Govindarajan B, Bai X, Cohen C, Zhong H, Kilroy S, Louis G, et al. Malignant transformation of melanocytes to melanoma by constitutive activation of mitogen-activated protein kinase kinase (MAPKK) signaling. *J Biol Chem* 2003;278(11):9790-5.
503. Stabuc B, Markovic J, Bartenjev I, Vrhovec I, Medved U, Kocijancic B. Urokinase-type plasminogen activator and plasminogen activator inhibitor type 1 and type 2 in stage I malignant melanoma. *Oncol Rep* 2003;10(3):635-9.
504. Chana JS, Grover R, Wilson GD, Hudson DA, Forders M, Sanders R, et al. The prognostic importance of c-myc oncogene expression in head and neck melanoma. *Ann Plast Surg* 2001;47(2):172-7.
505. Duncan LM, Deeds J, Cronin FE, Donovan M, Sober AJ, Kauffman M, et al. Melastatin expression and prognosis in cutaneous malignant melanoma. *J Clin Oncol* 2001;19(2):568-76.
506. Scholl FA, Kamarashev J, Murmann OV, Geertsen R, Dummer R, Schafer BW. PAX3 is expressed in human melanomas and contributes to tumor cell survival. *Cancer Res* 2001;61(3):823-6.
507. Bartenjev I, Rudolf Z, Stabuc B, Vrhovec I, Perkovic T, Kansky A. Cathepsin D expression in early cutaneous malignant melanoma. *Int J Dermatol* 2000;39(8):599-602.
508. Rudolph P, Schubert C, Tamm S, Heidorn K, Hauschild A, Michalska I, et al. Telomerase activity in melanocytic lesions: A potential marker of tumor biology. *Am J Pathol* 2000;156(4):1425-32.
509. Nurnberg W, Tobias D, Otto F, Henz BM, Schadendorf D. Expression of interleukin-8 detected by in situ hybridization correlates with worse prognosis in primary cutaneous melanoma. *J Pathol* 1999;189(4):546-51.
510. Ross DA, Wilson GD. Expression of c-myc oncoprotein represents a new prognostic marker in cutaneous melanoma. *Br J Surg* 1998;85(1):46-51.
511. Grover R, Ross DA, Wilson GD, Sanders R. Measurement of c-myc oncoprotein provides an independent prognostic marker for regional metastatic melanoma. *Br J Plast Surg* 1997;50(7):478-82.
512. Ross DA, Wilson GD. Flow cytometric analysis of p53 oncoprotein expression in cutaneous melanoma. *Br J Surg* 1997;84(6):803-7.
513. Fleming MG, Howe SF, Graf LH, Jr. Expression of insulin-like growth factor I (IGF-I) in nevi and melanomas. *Am J Dermatopathol* 1994;16(4):383-91.
514. Walker MJ, Ronan SG, Han MC, Beattie CW, Das Gupta TK. Interrelationship between histopathologic characteristics of melanoma and estrogen receptor status. *Cancer* 1991;68(1):184-8.
515. Walker MJ, Beattie CW, Patel MK, Ronan SM, Das Gupta TK. Estrogen receptor in malignant melanoma. *J Clin Oncol* 1987;5(8):1256-61.
